# Supplementary material for: Quantitative analysis of mammalian translation initiation sites by FACS-seq
Source: PubMed Central journal article supplement (PMC4299517; doi:10.15252/msb.20145136), 2014-08-28

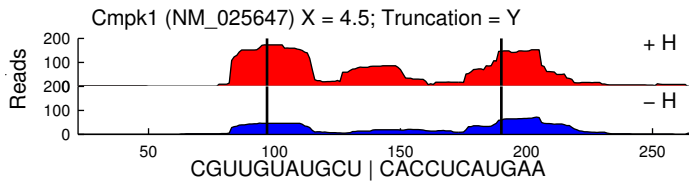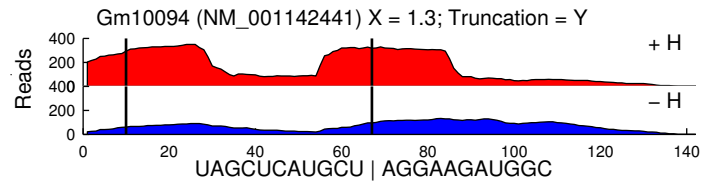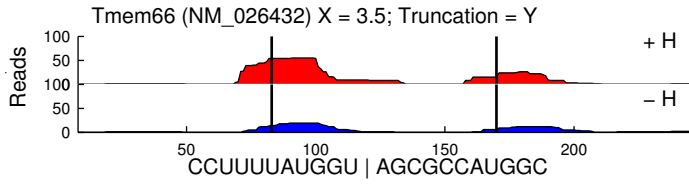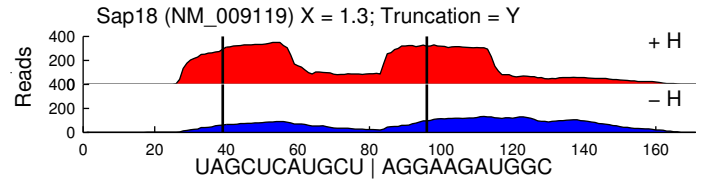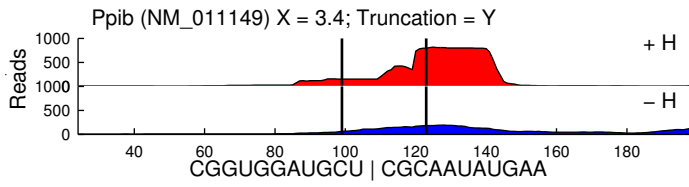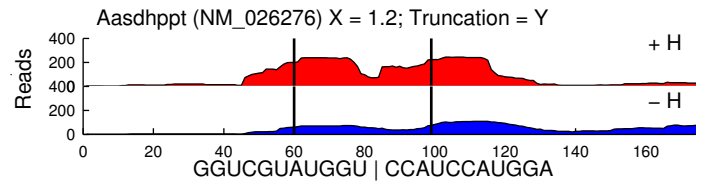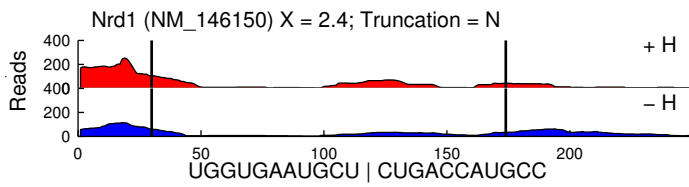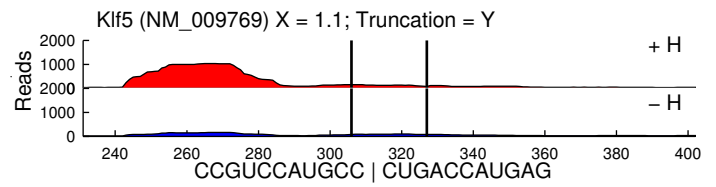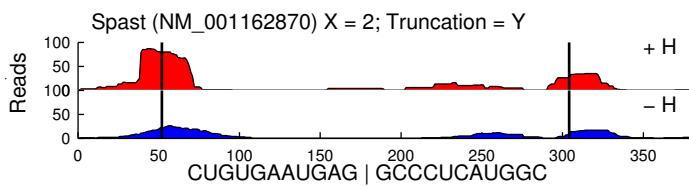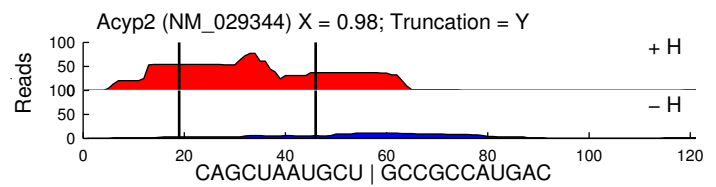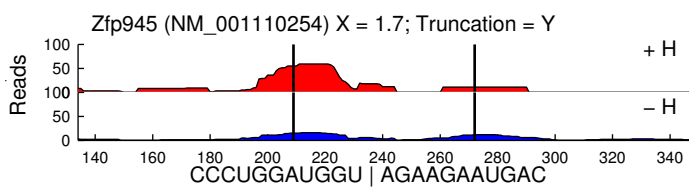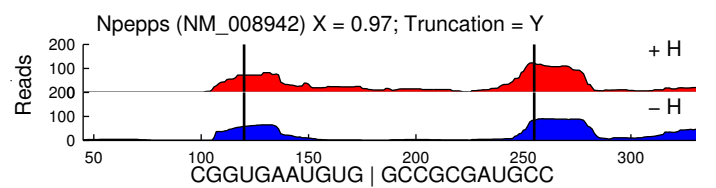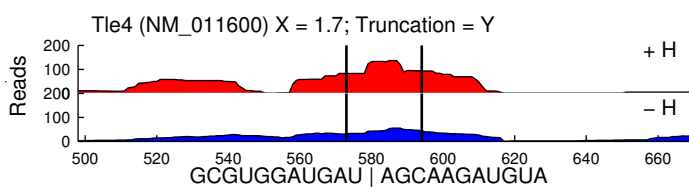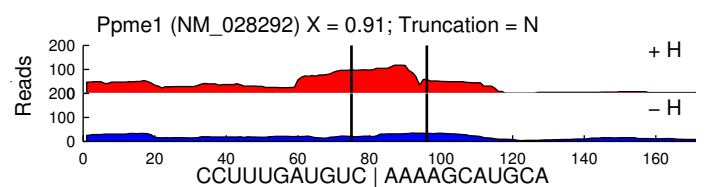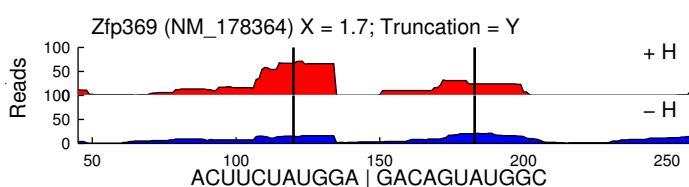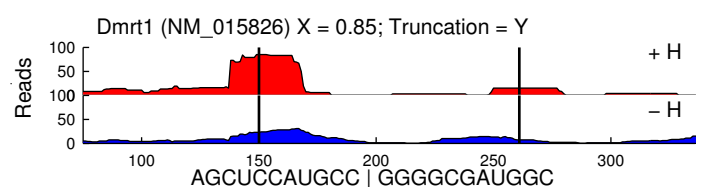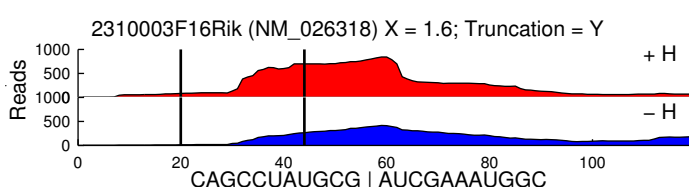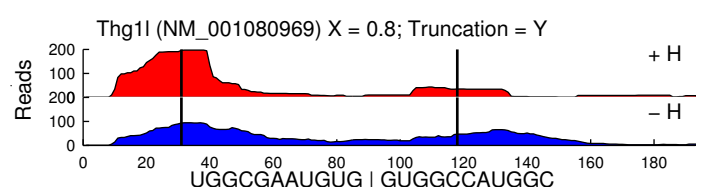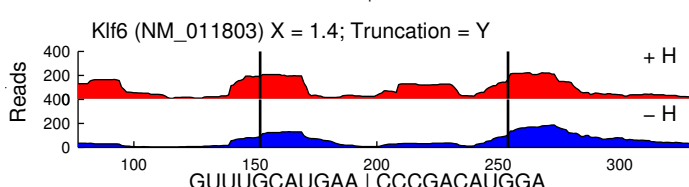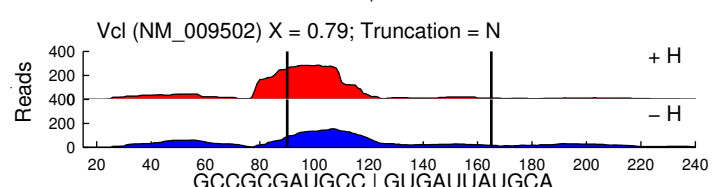

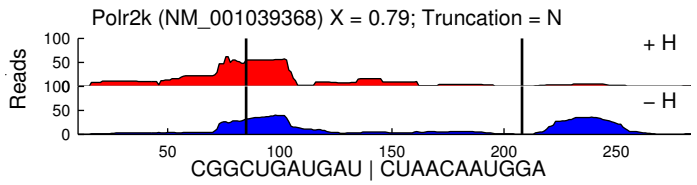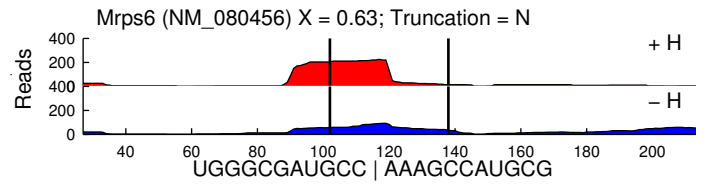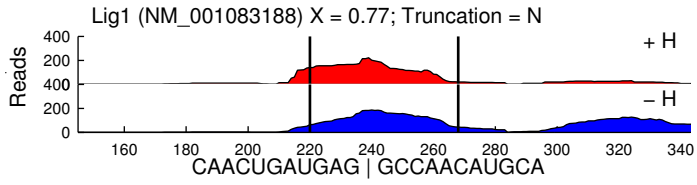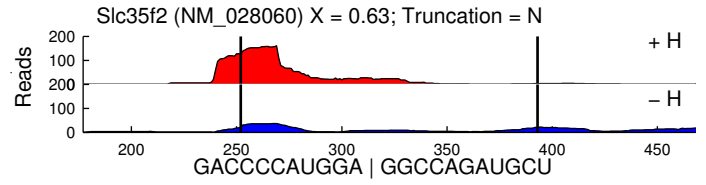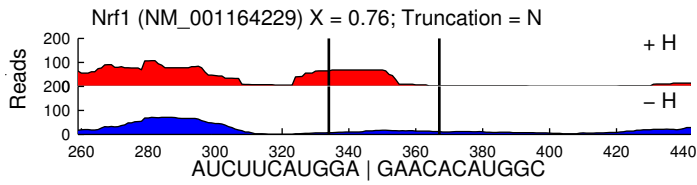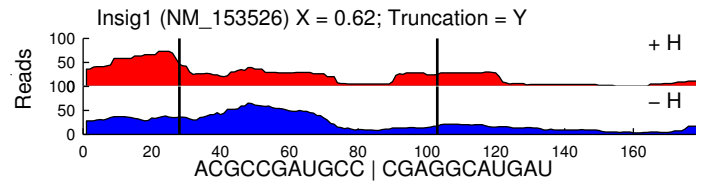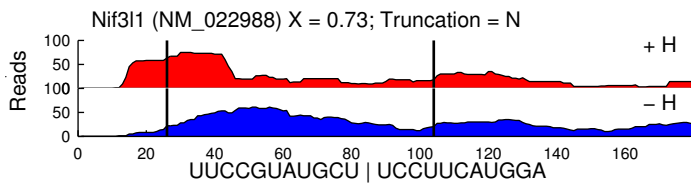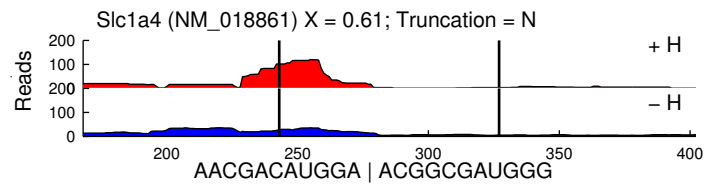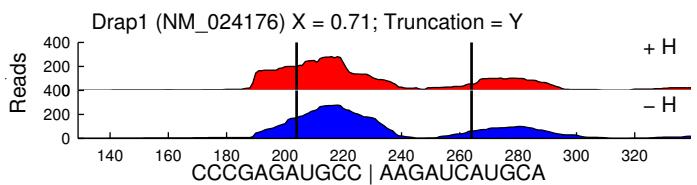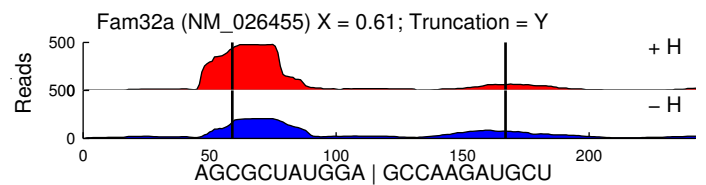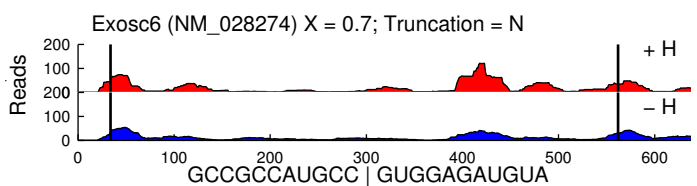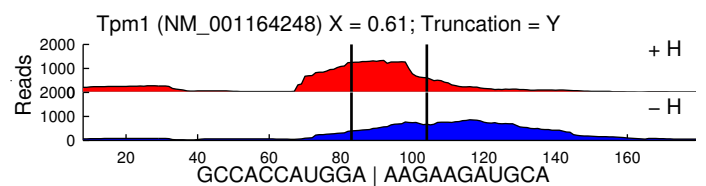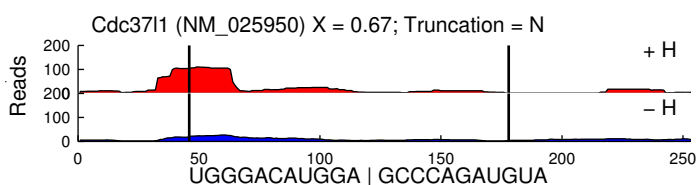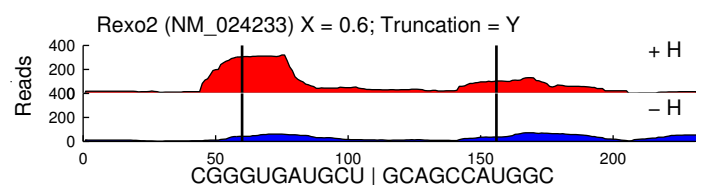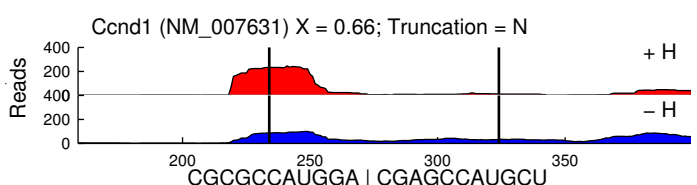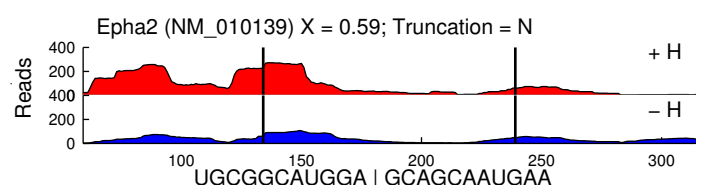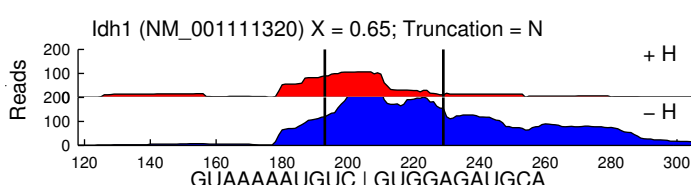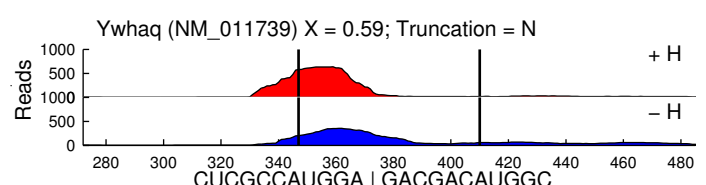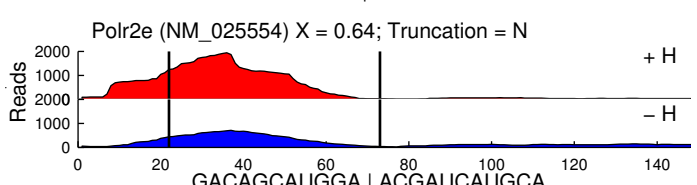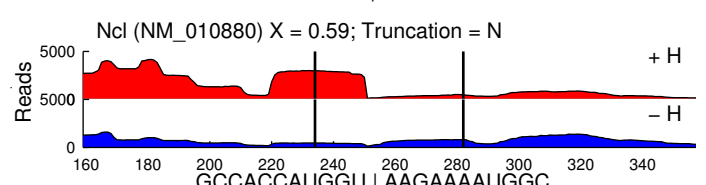

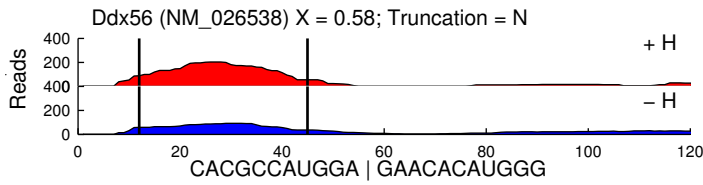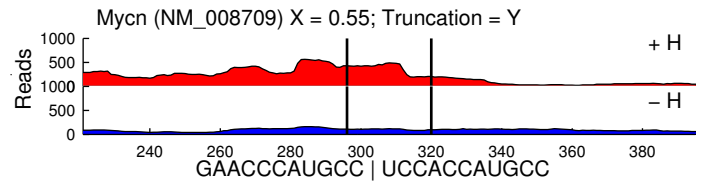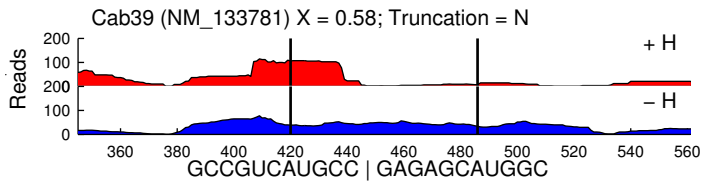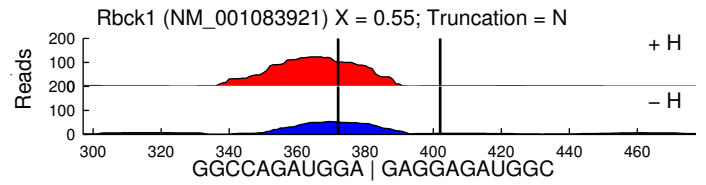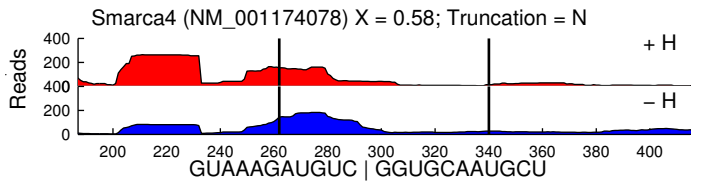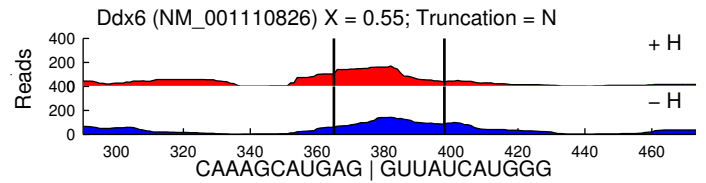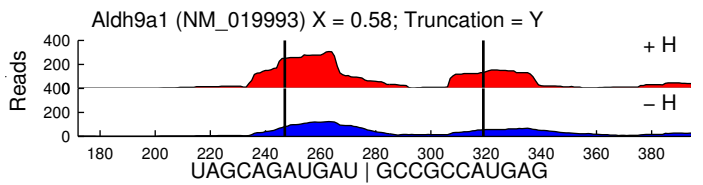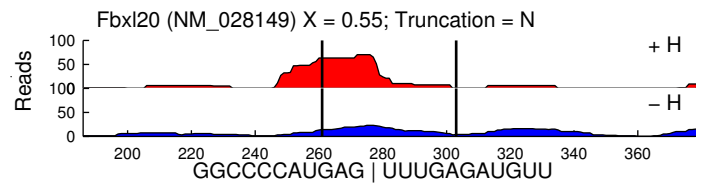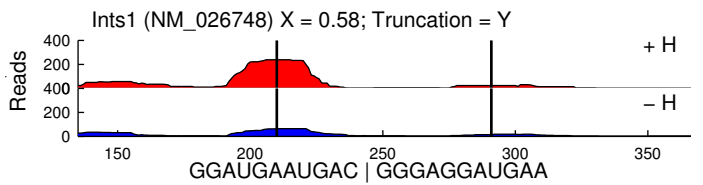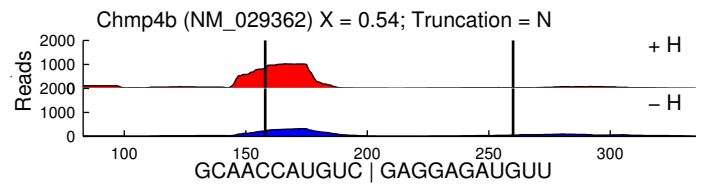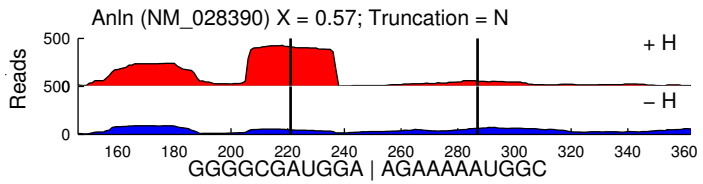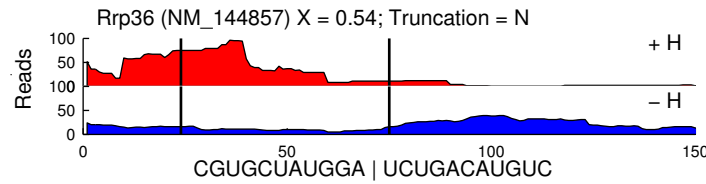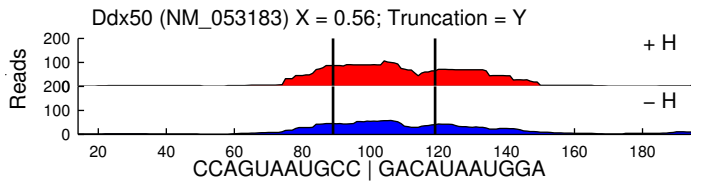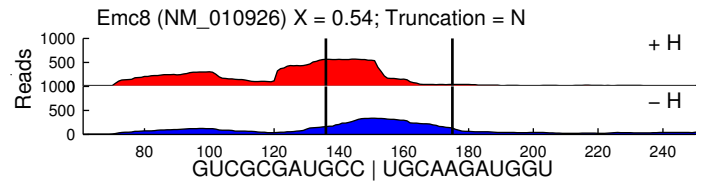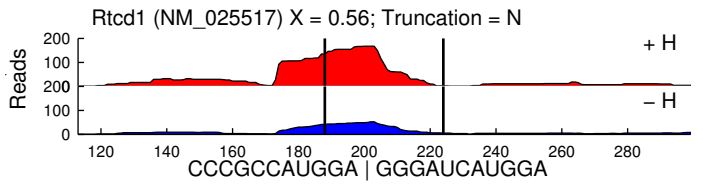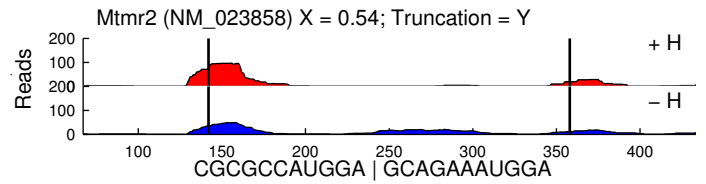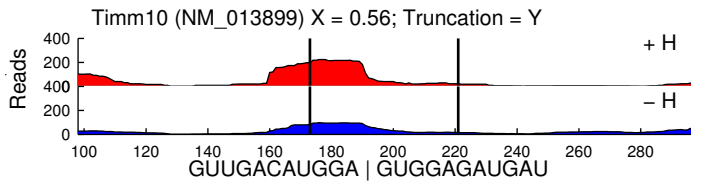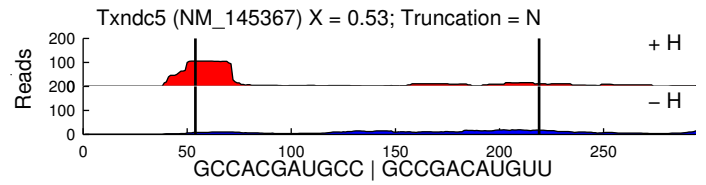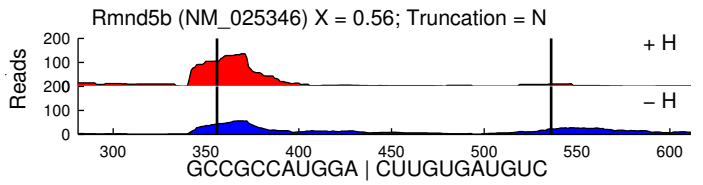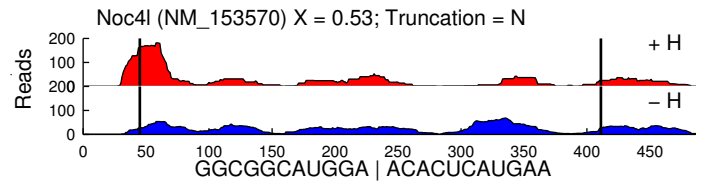

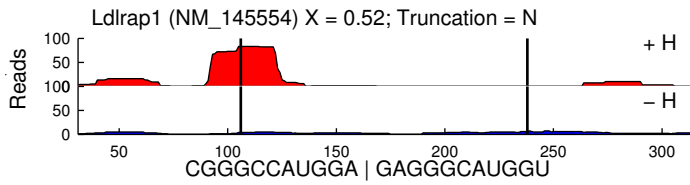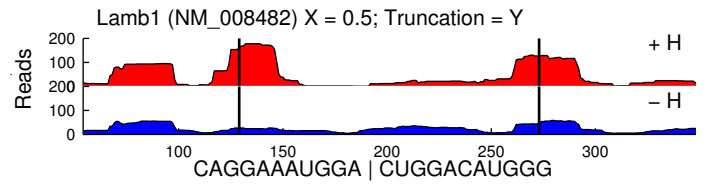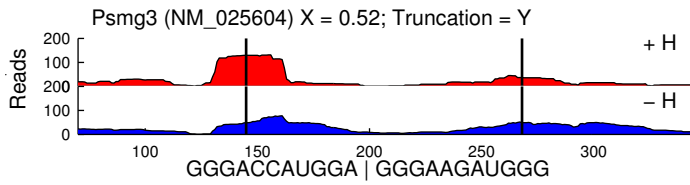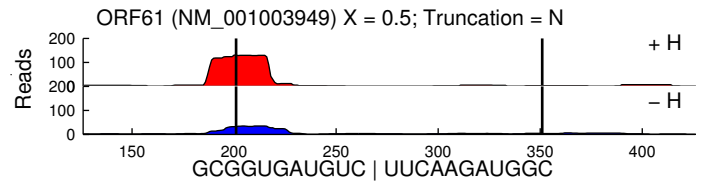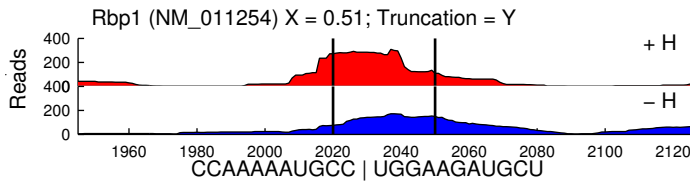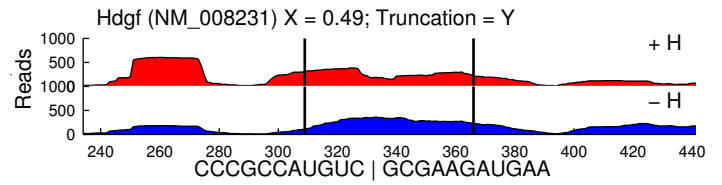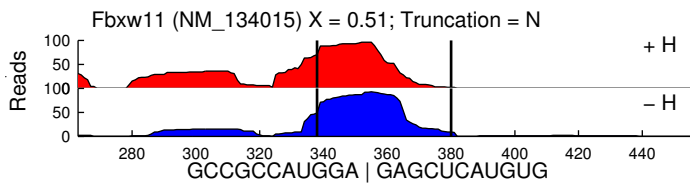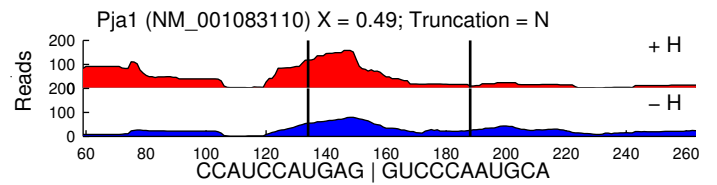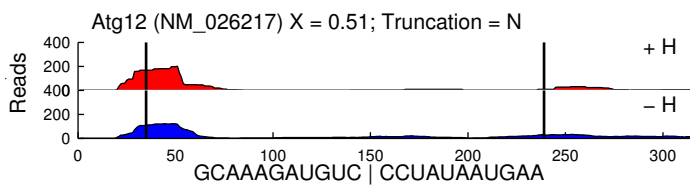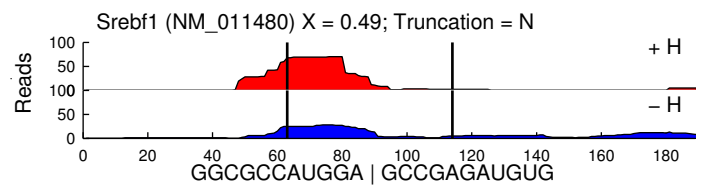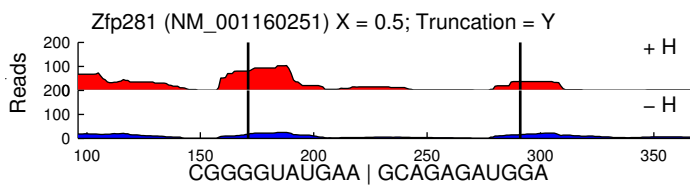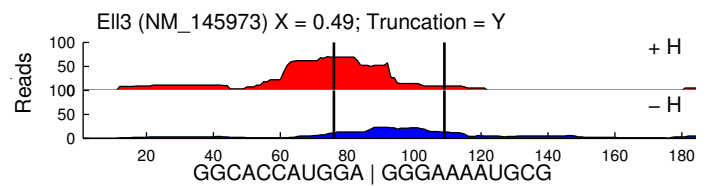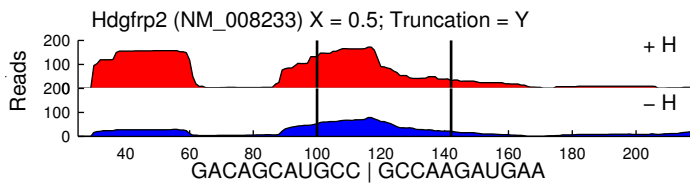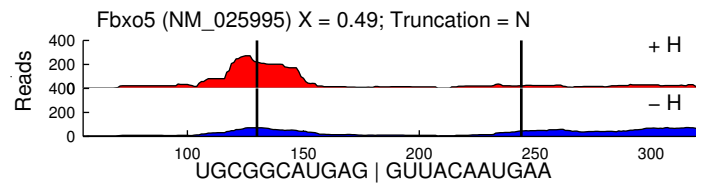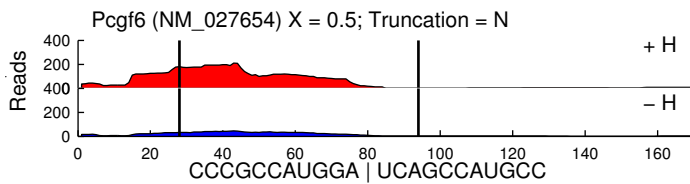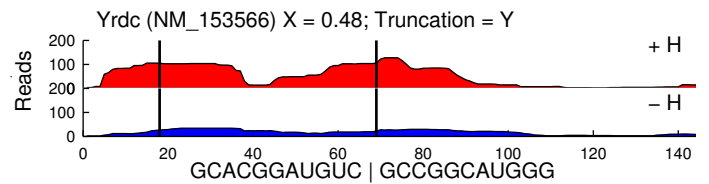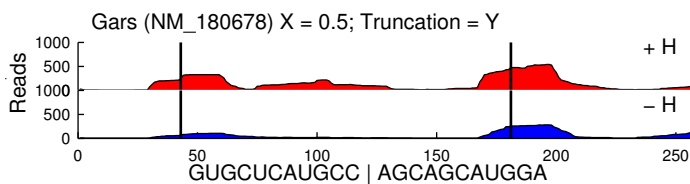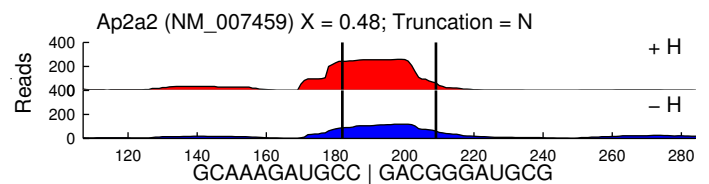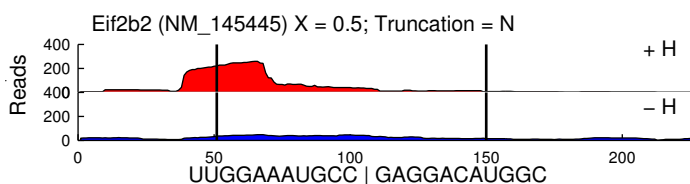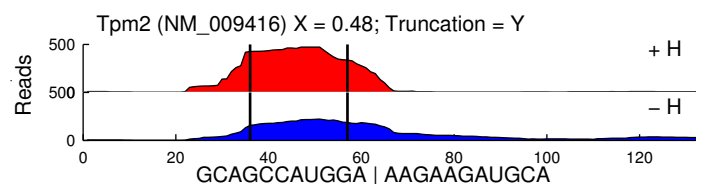

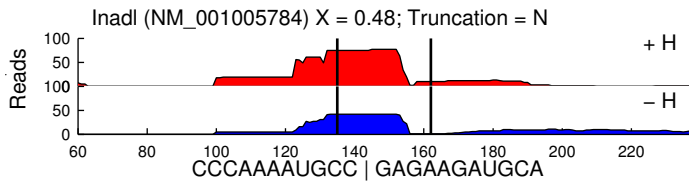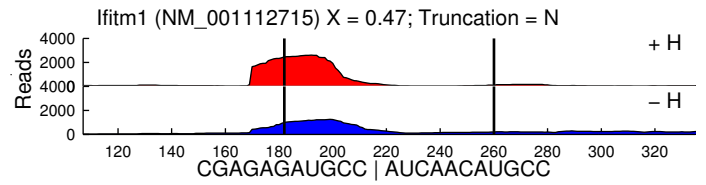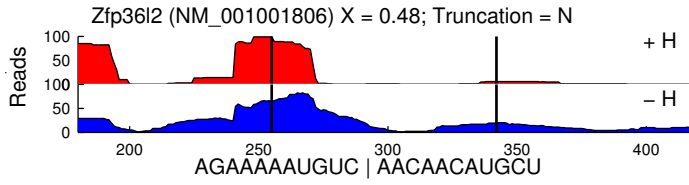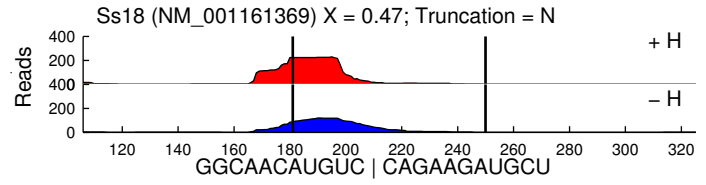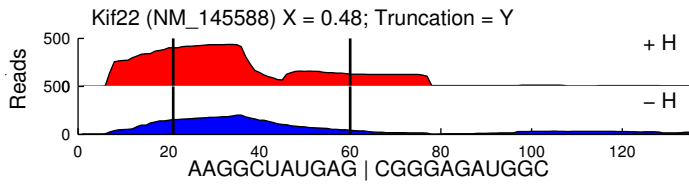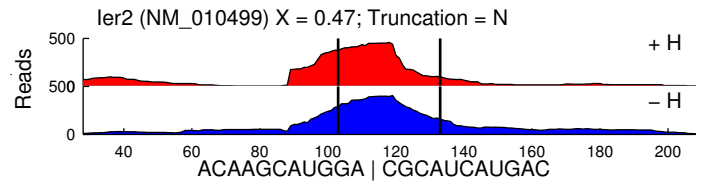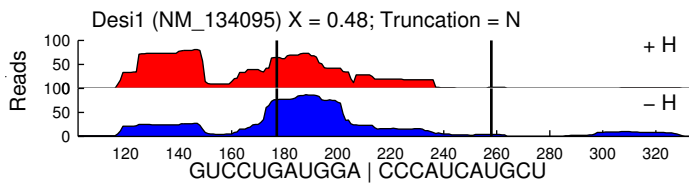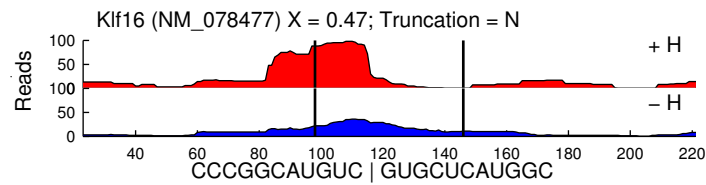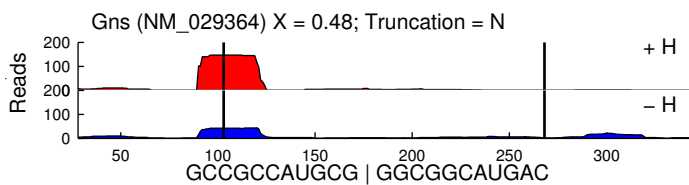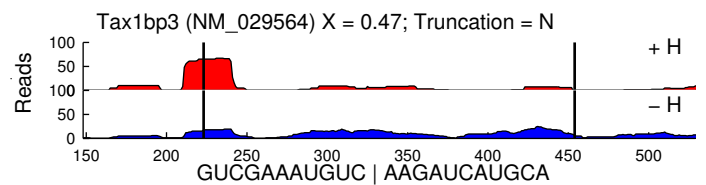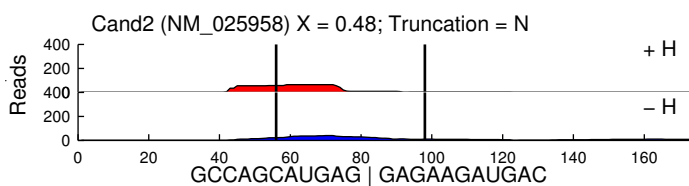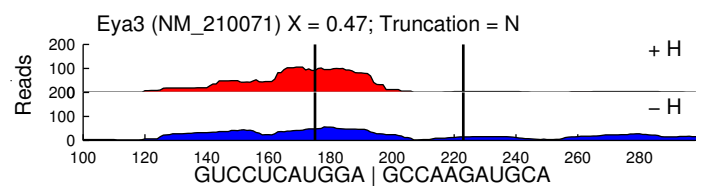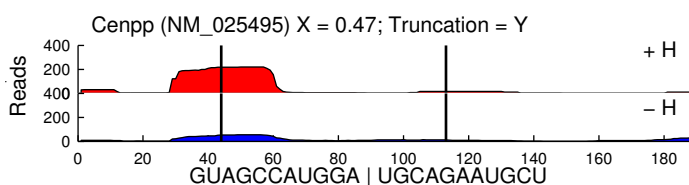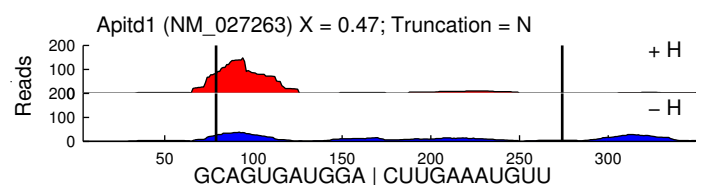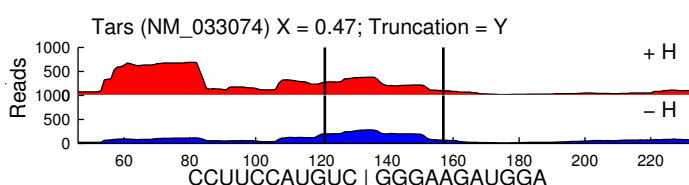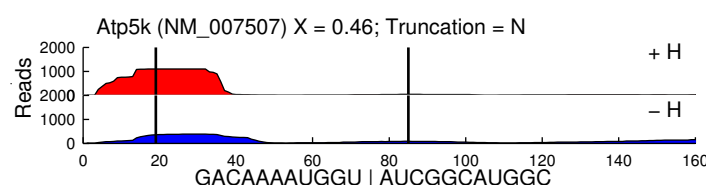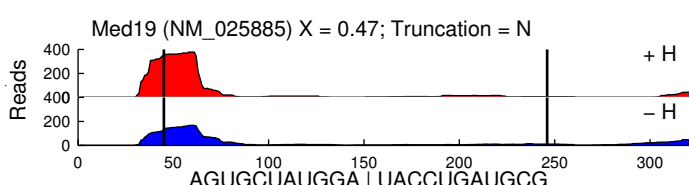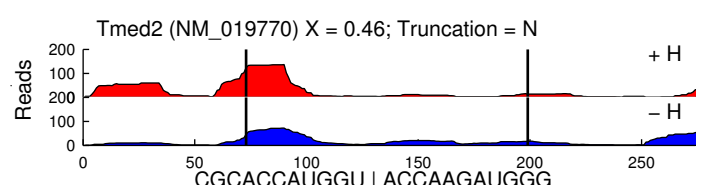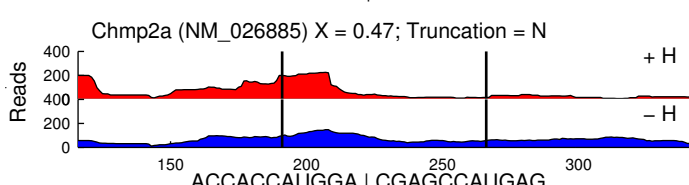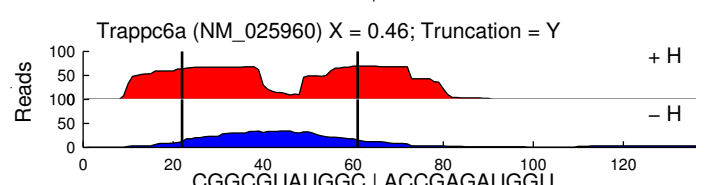

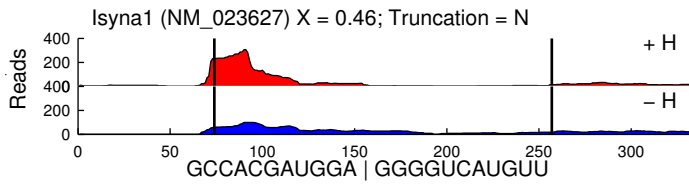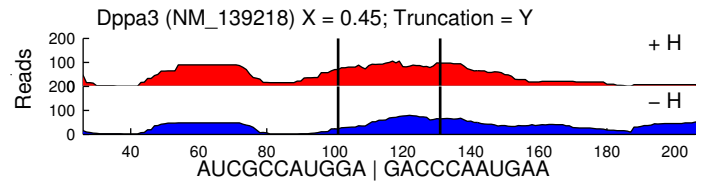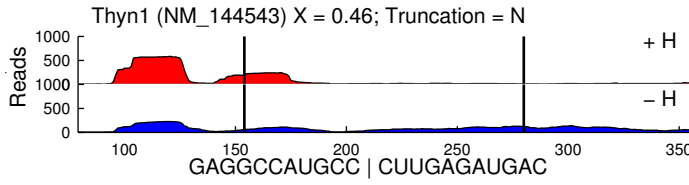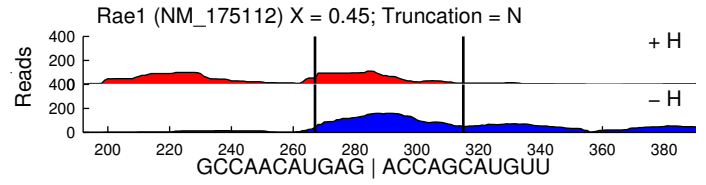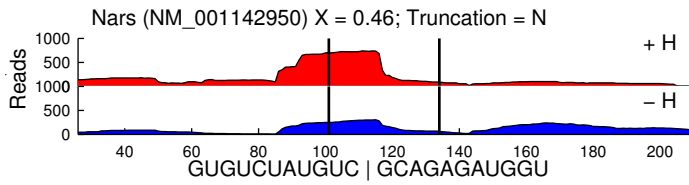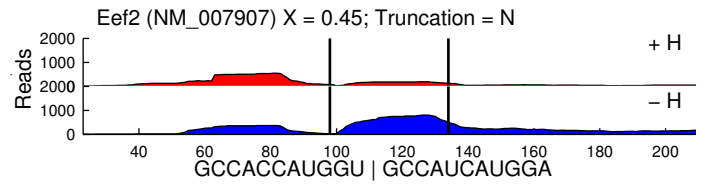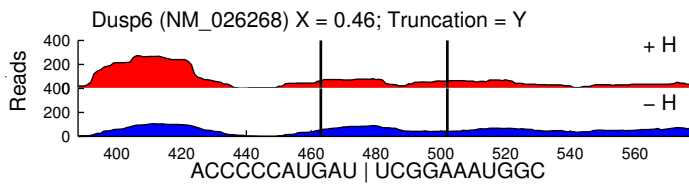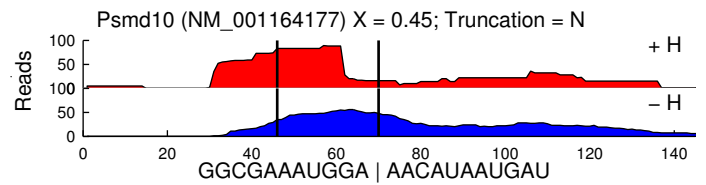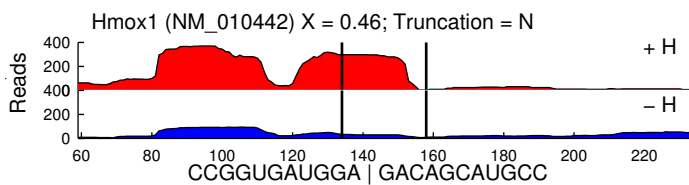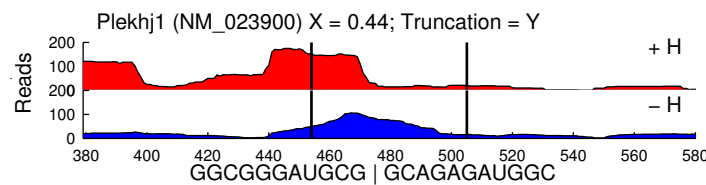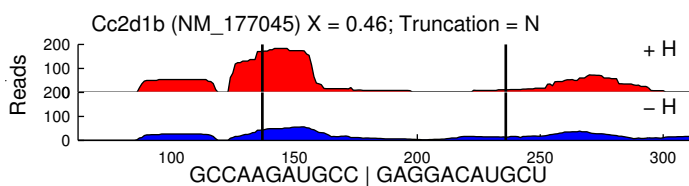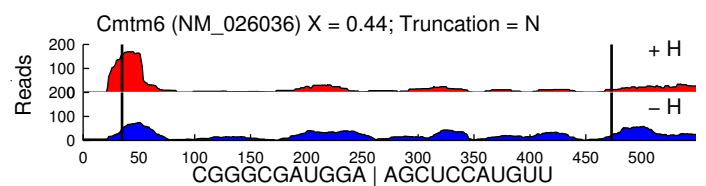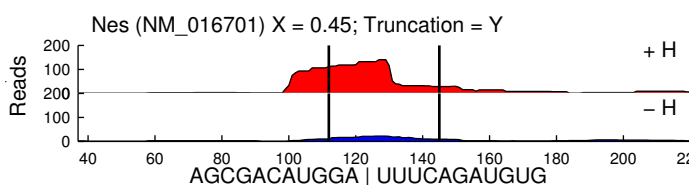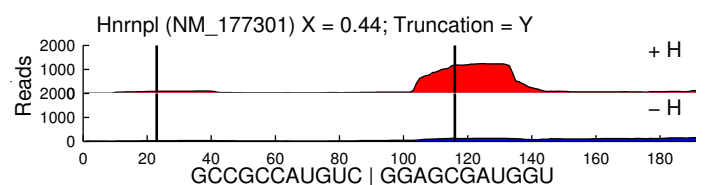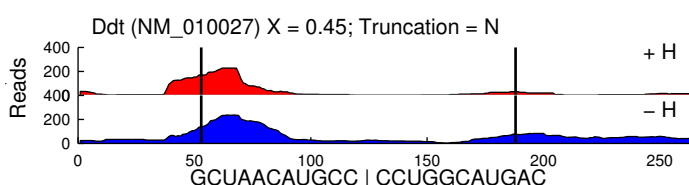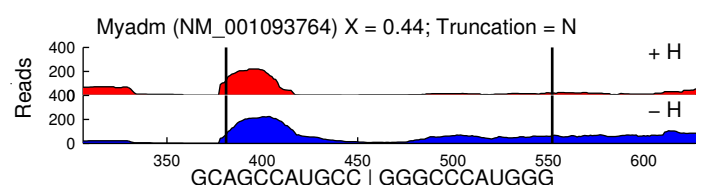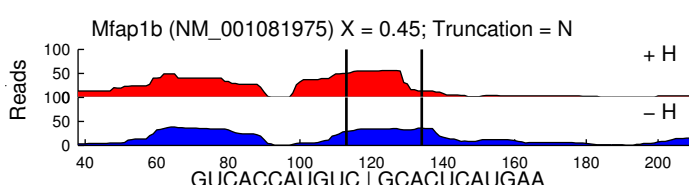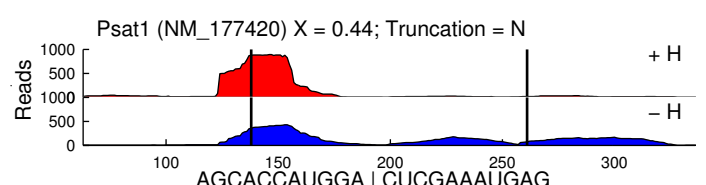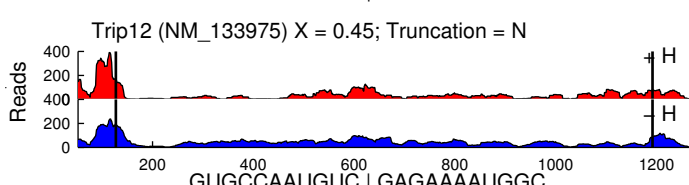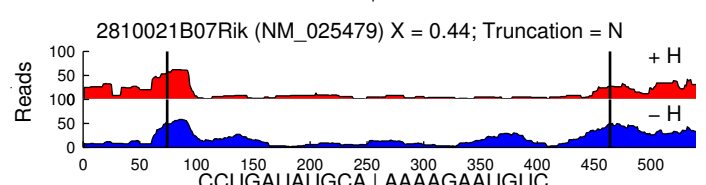

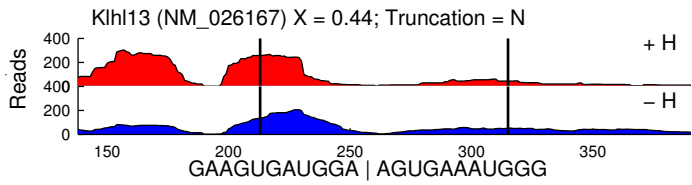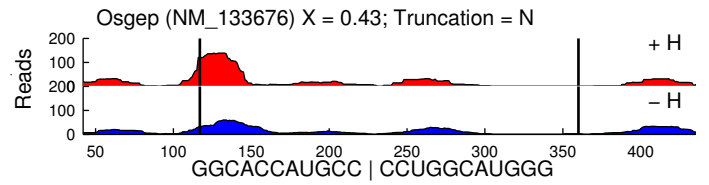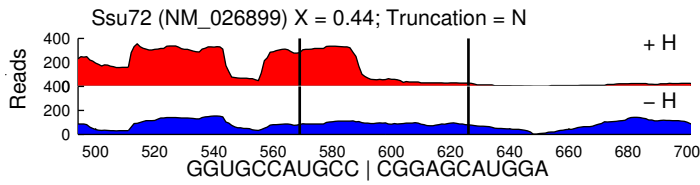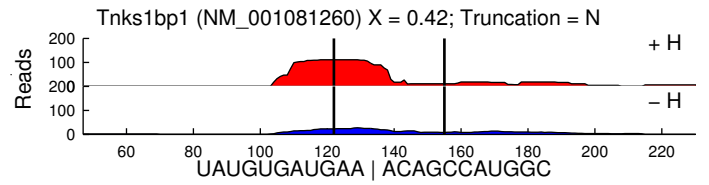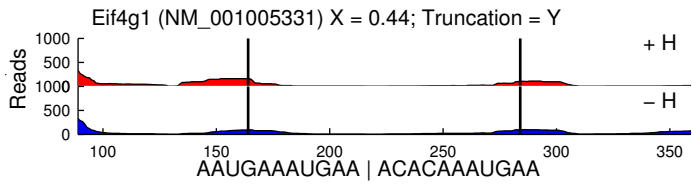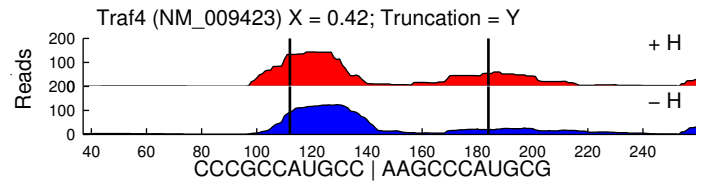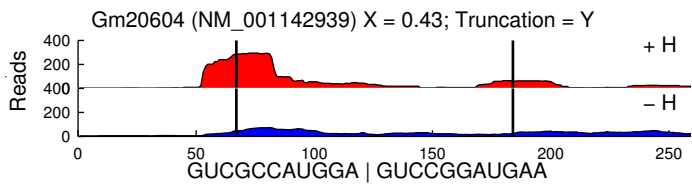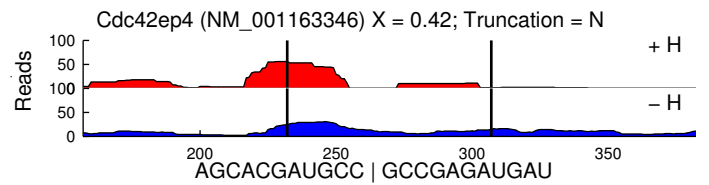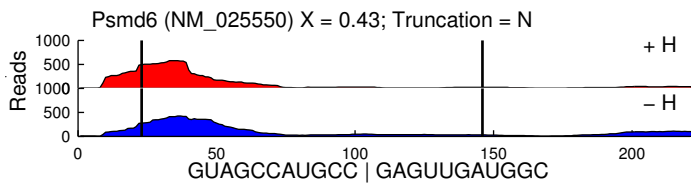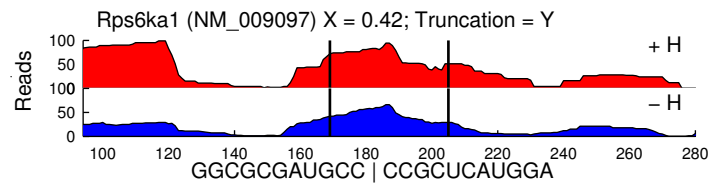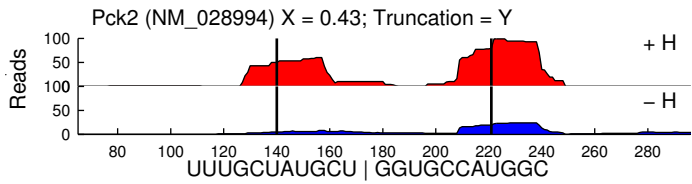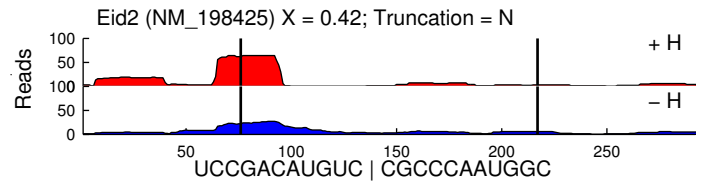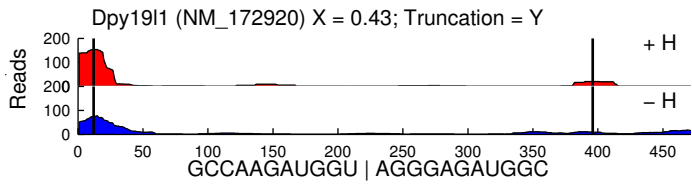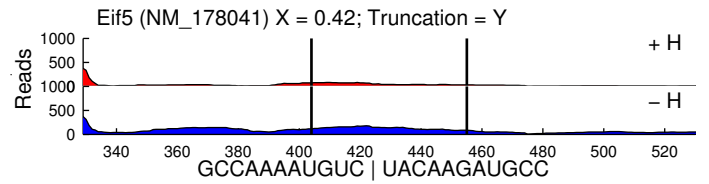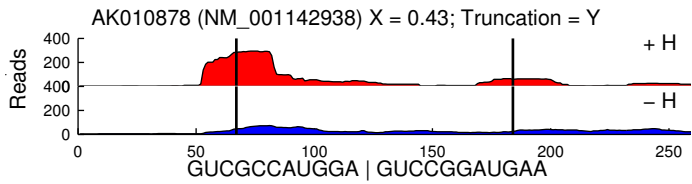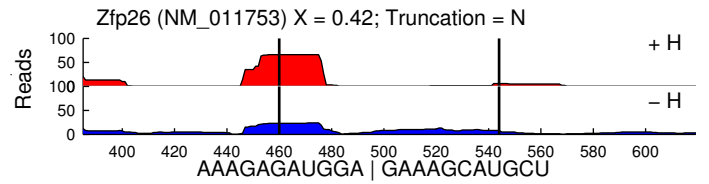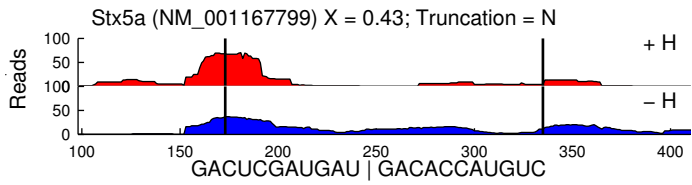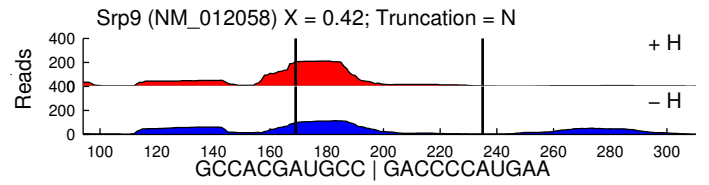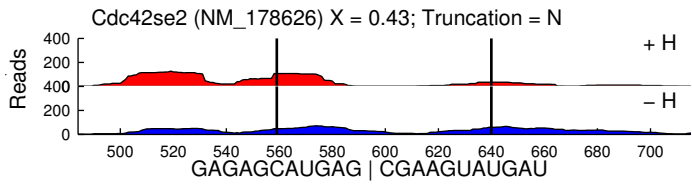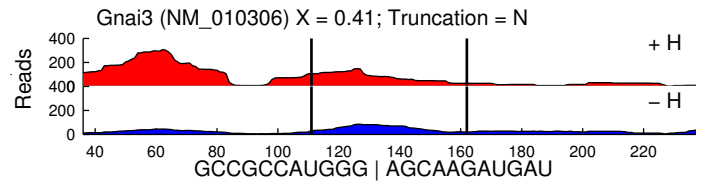

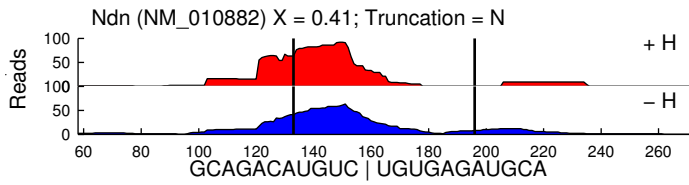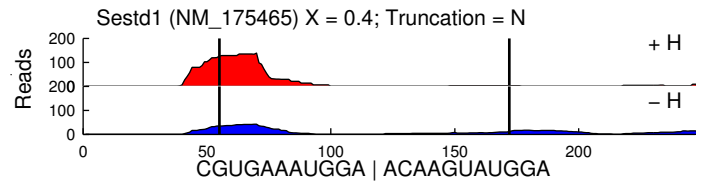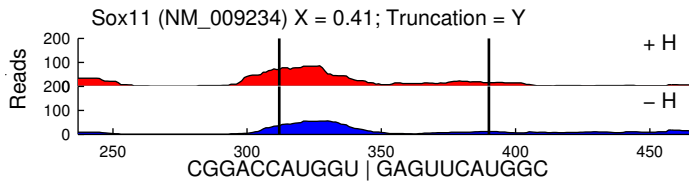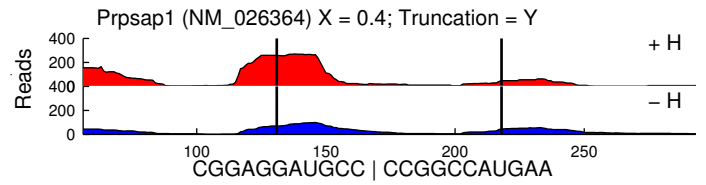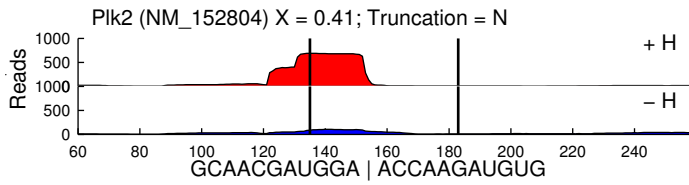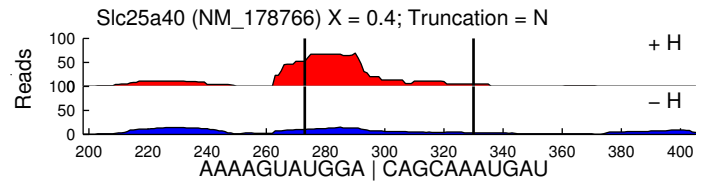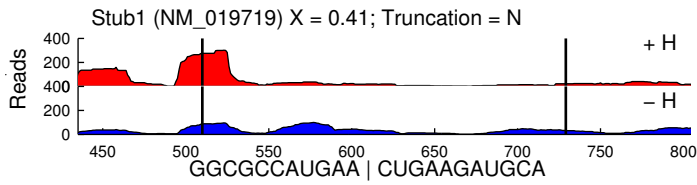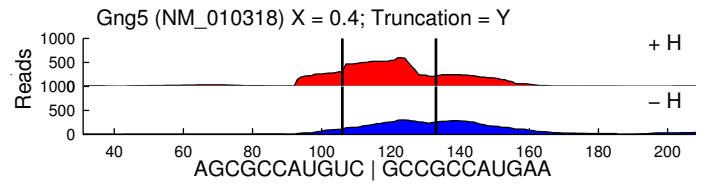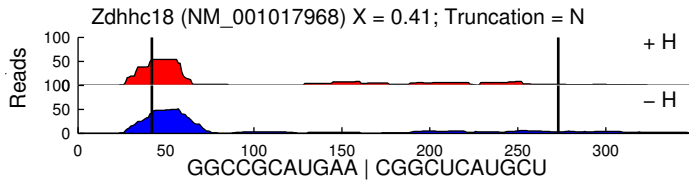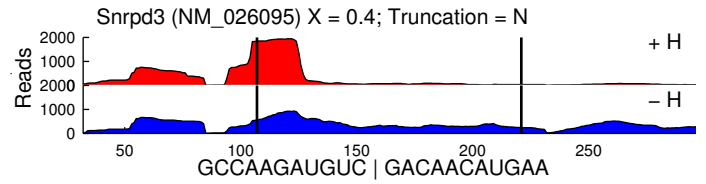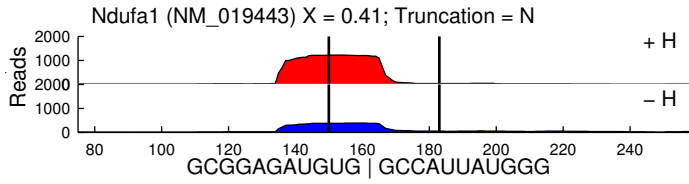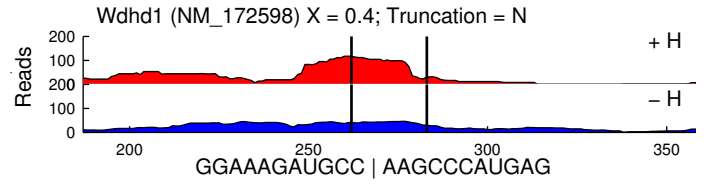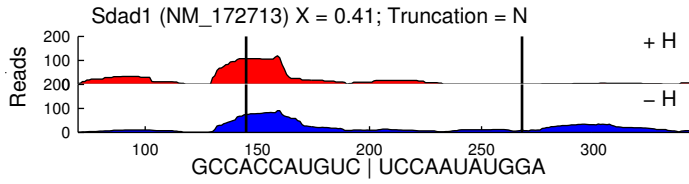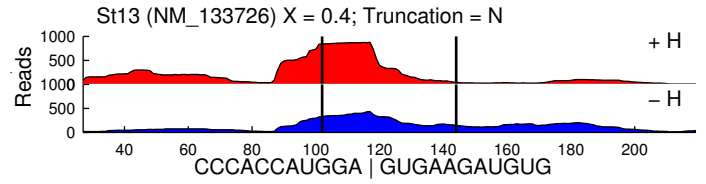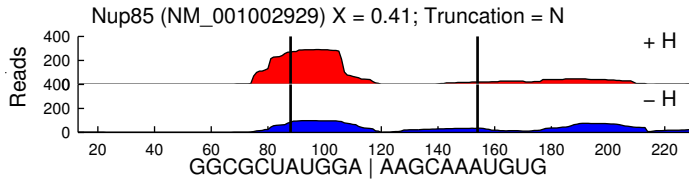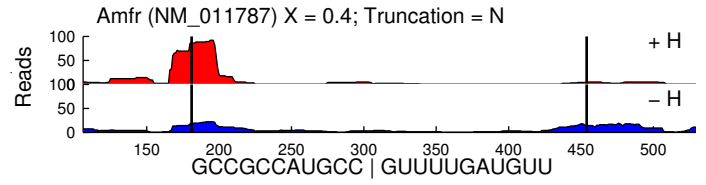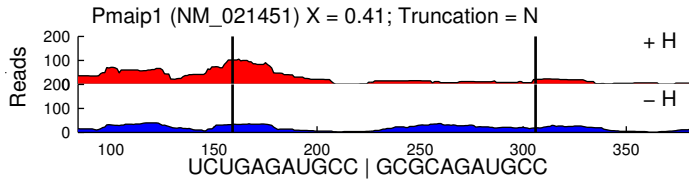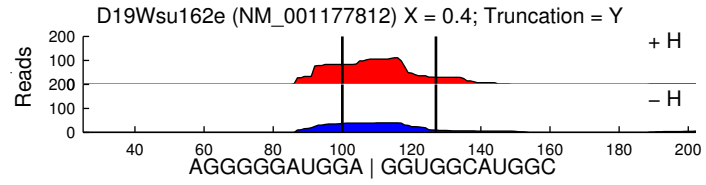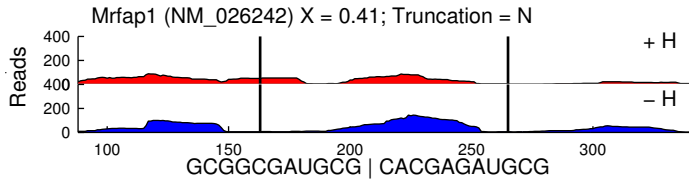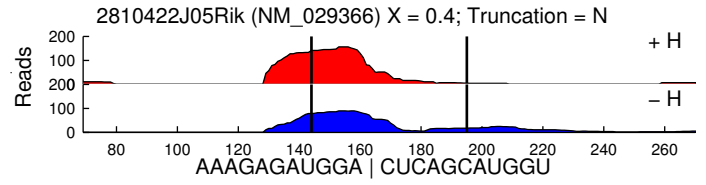



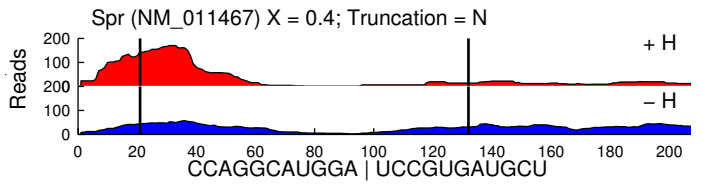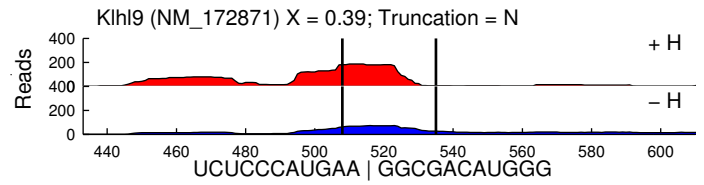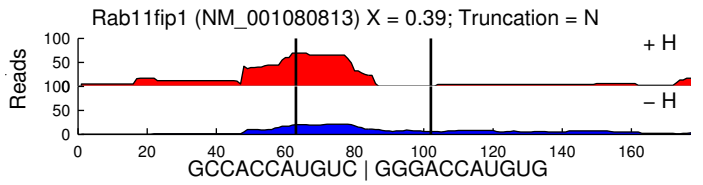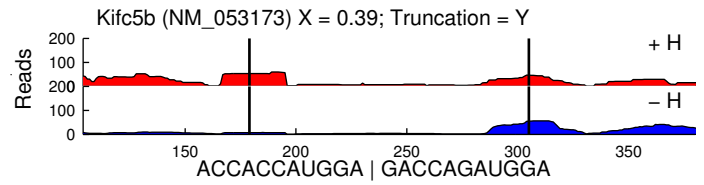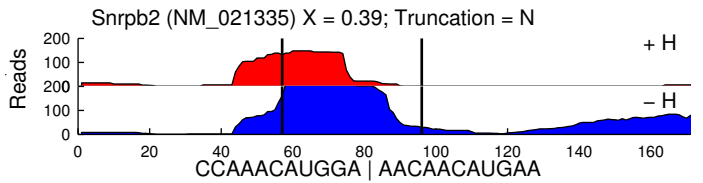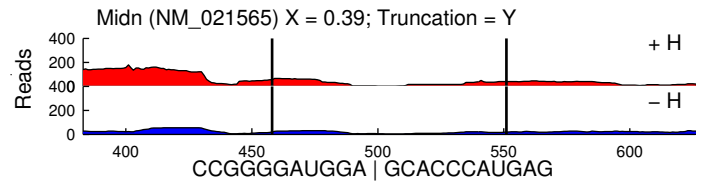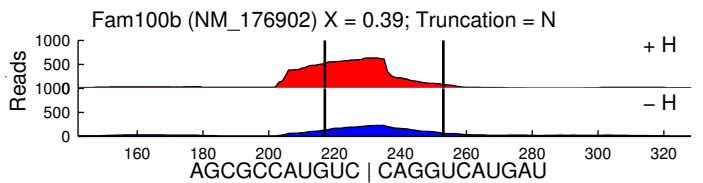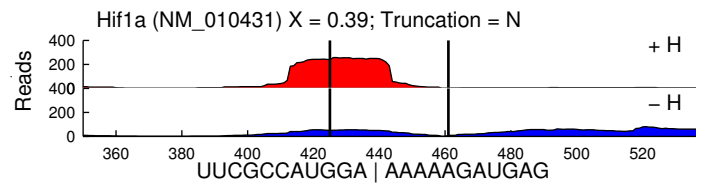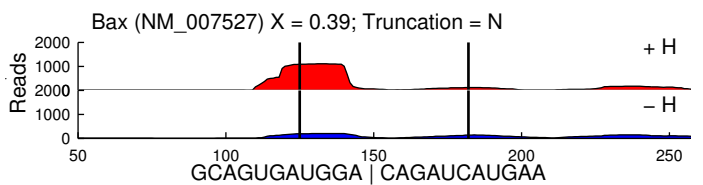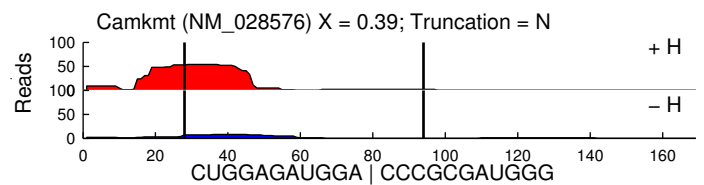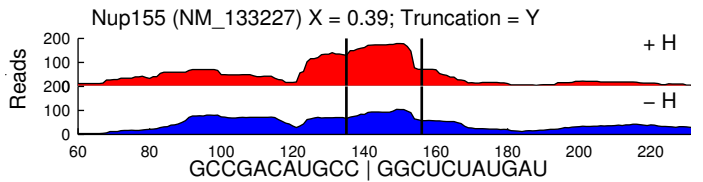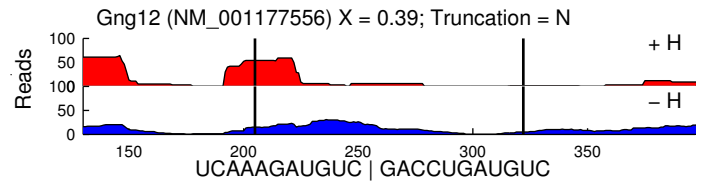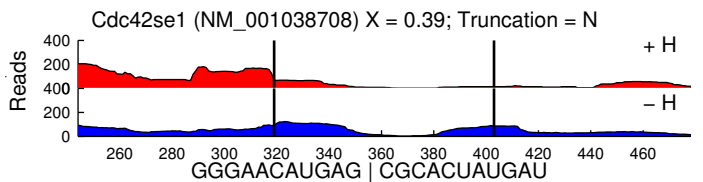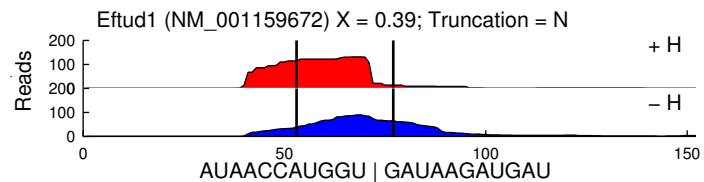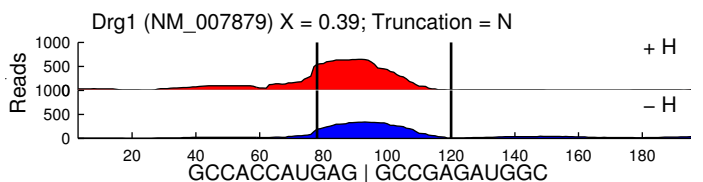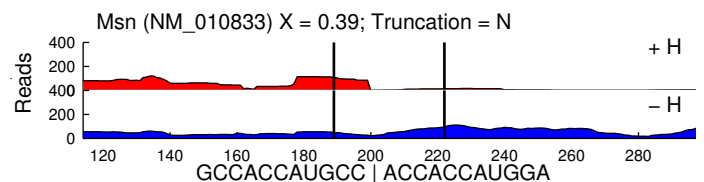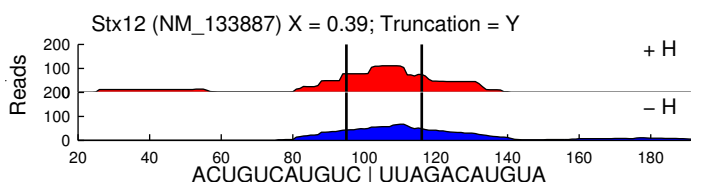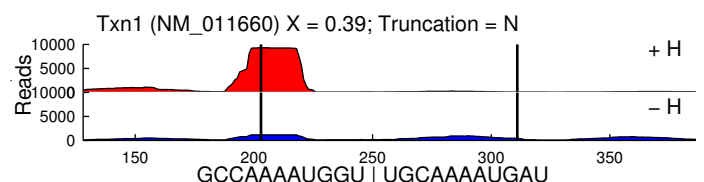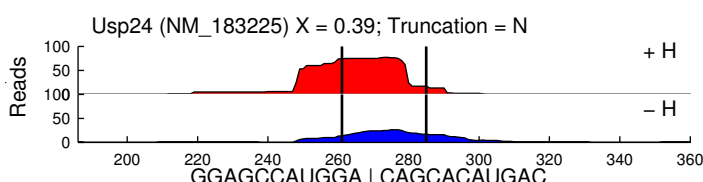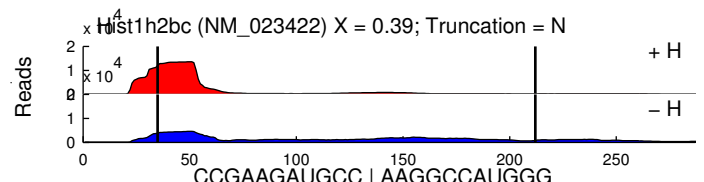

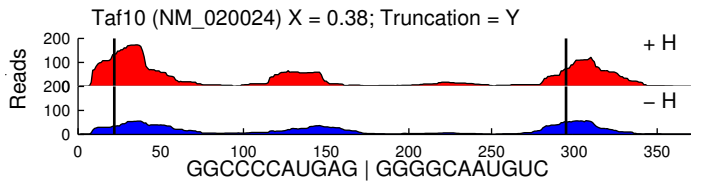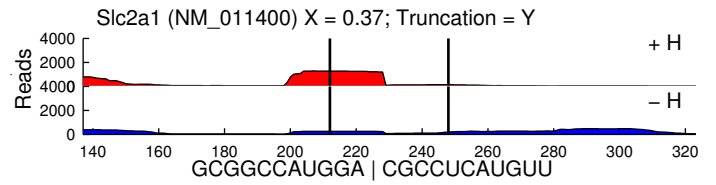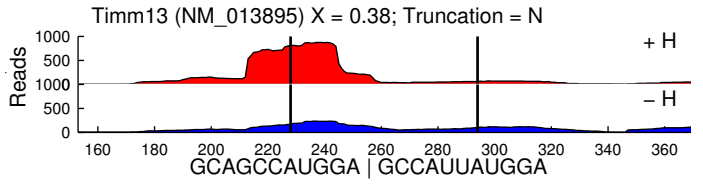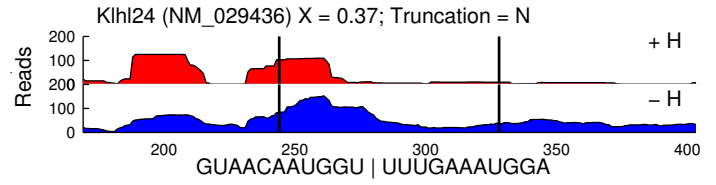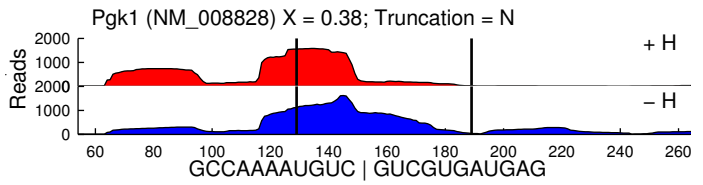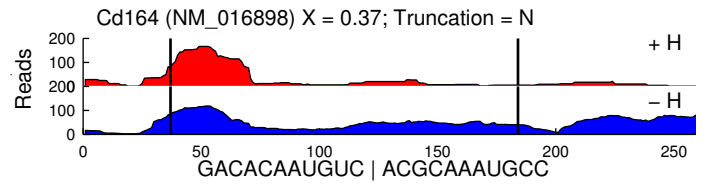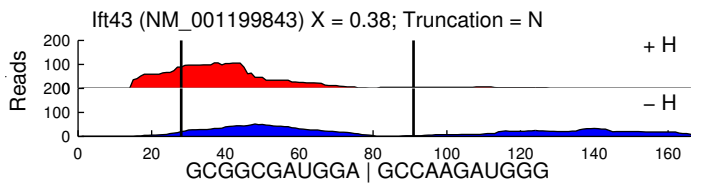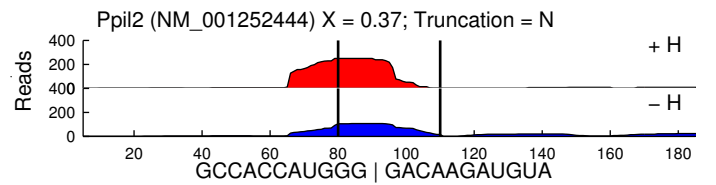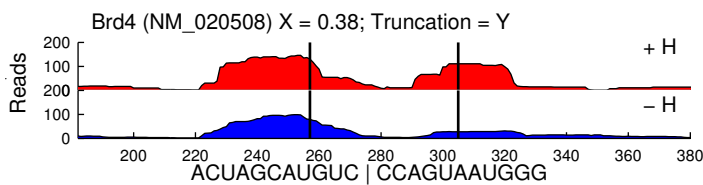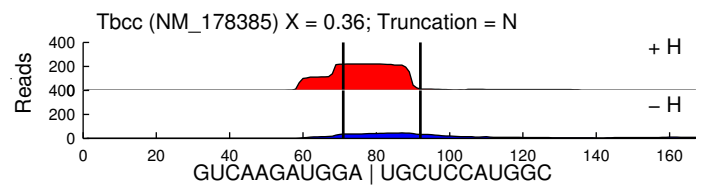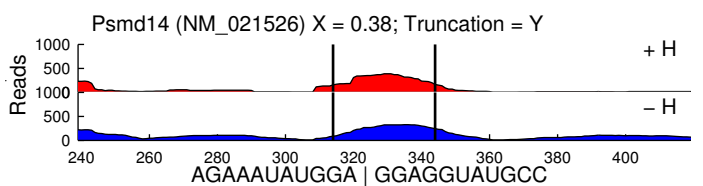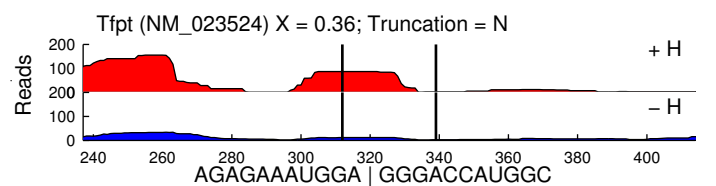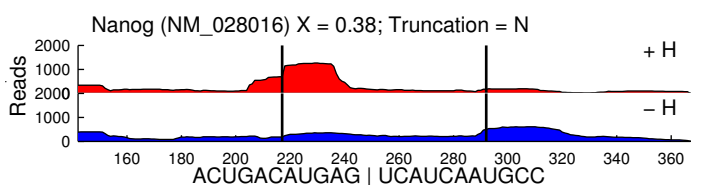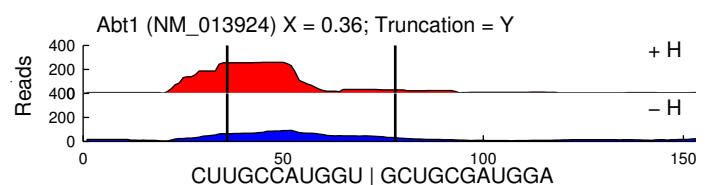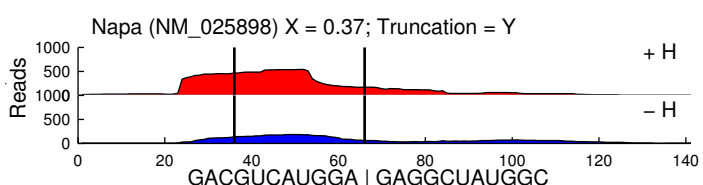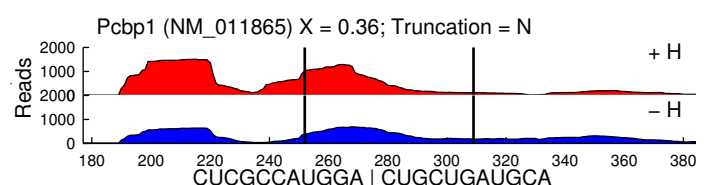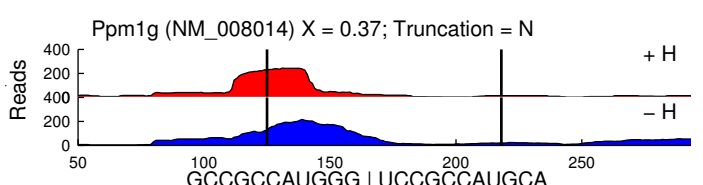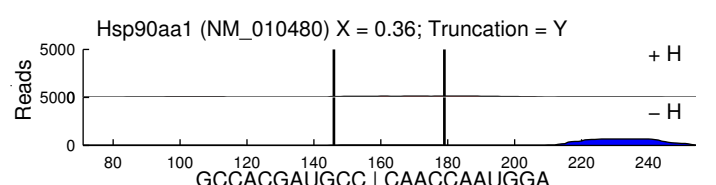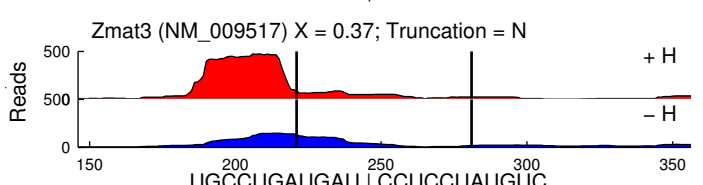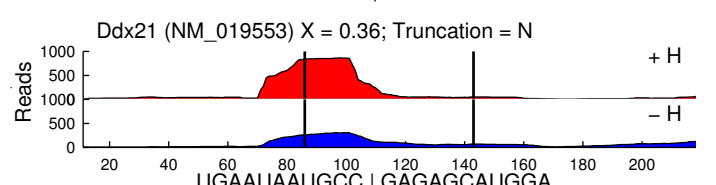

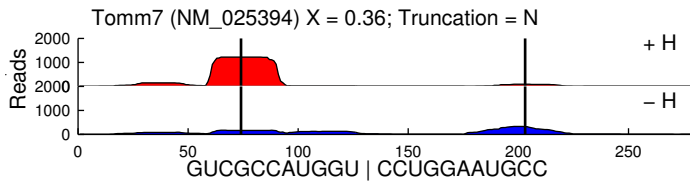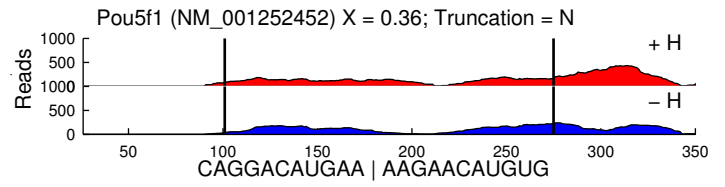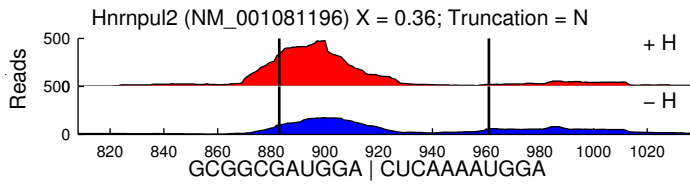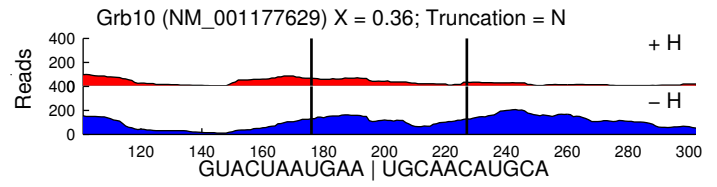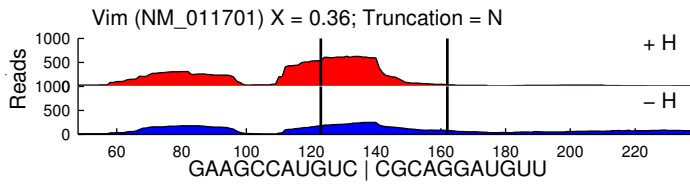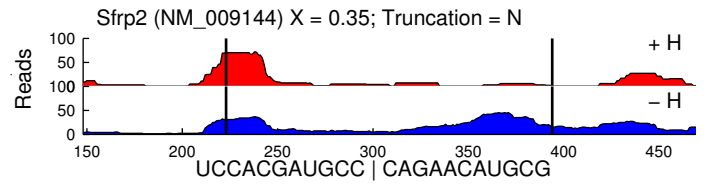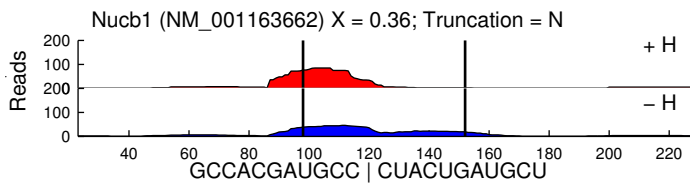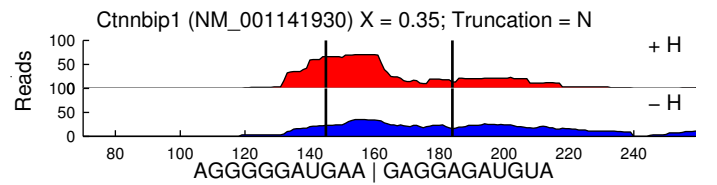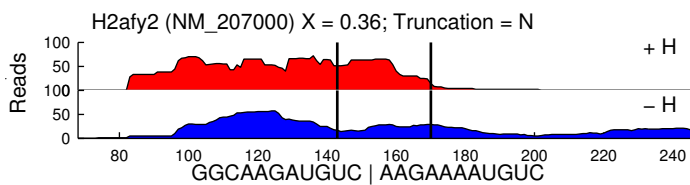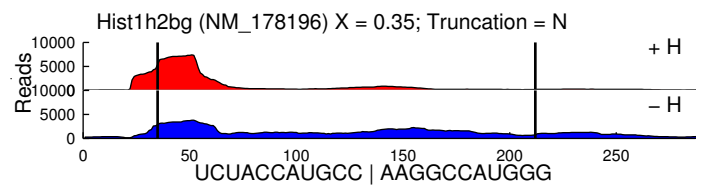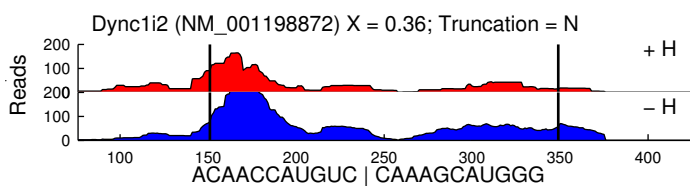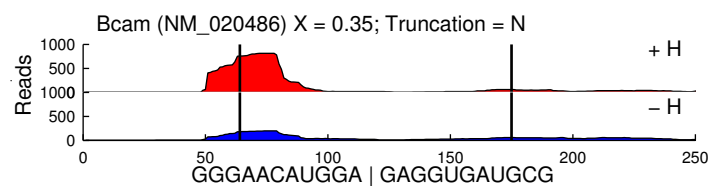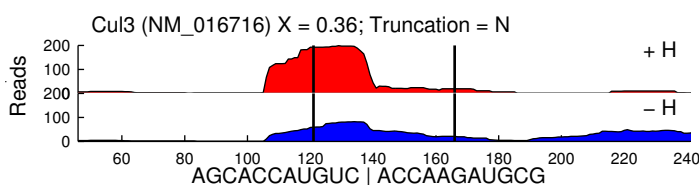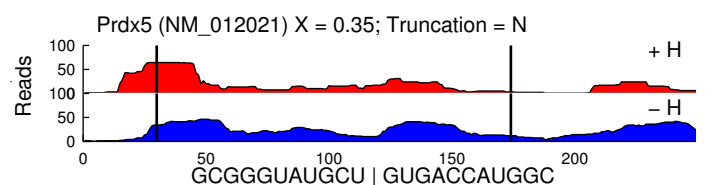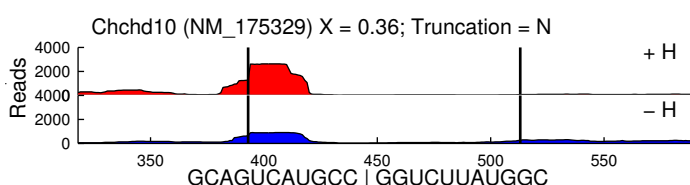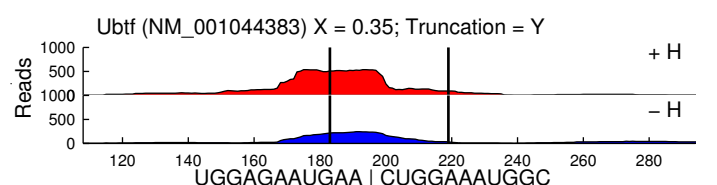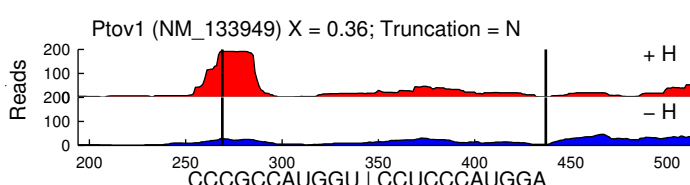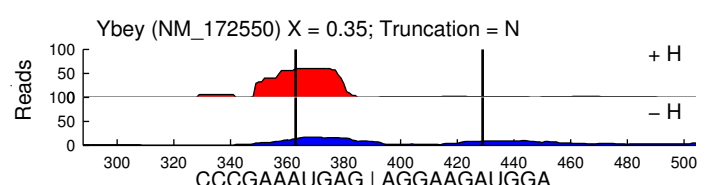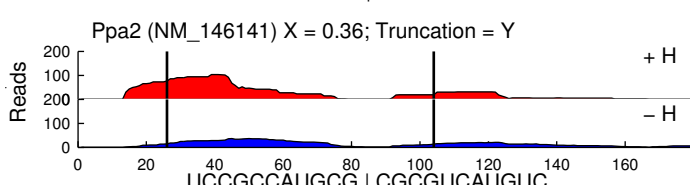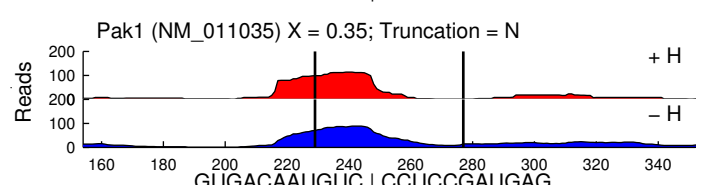

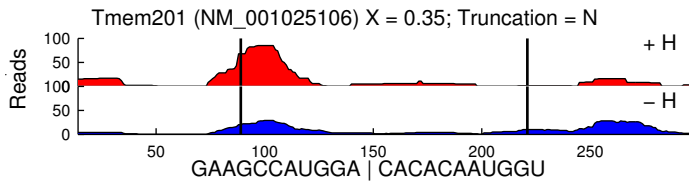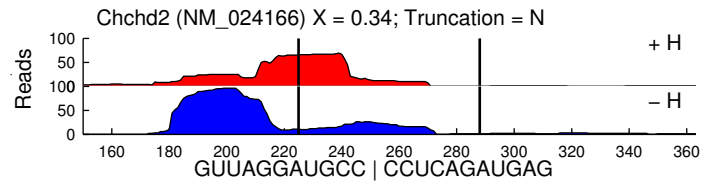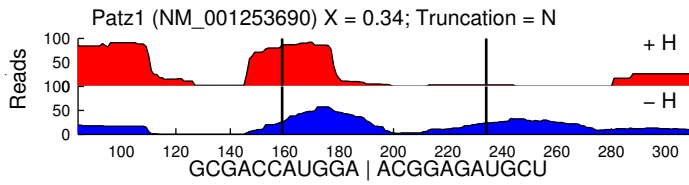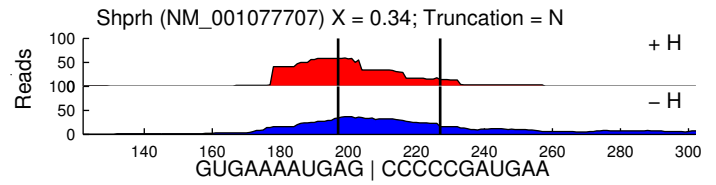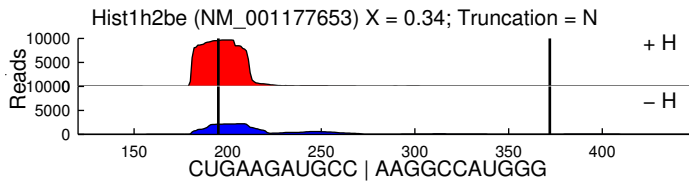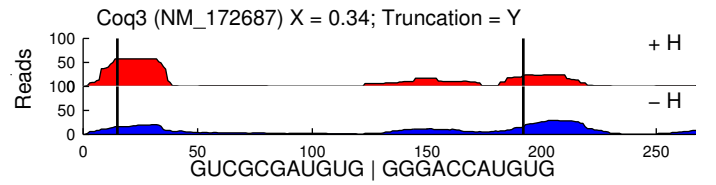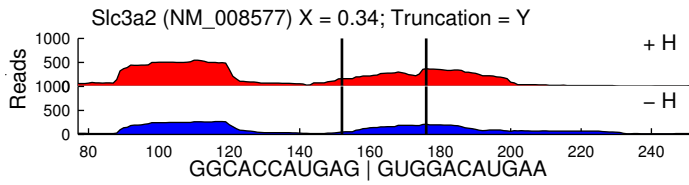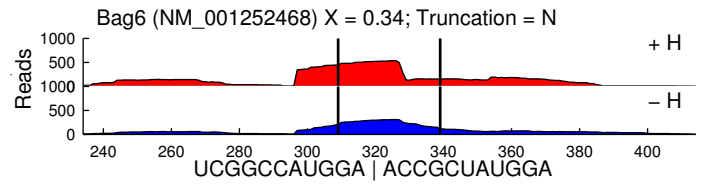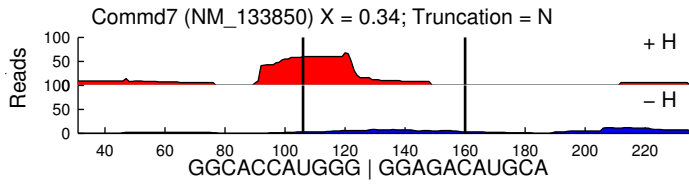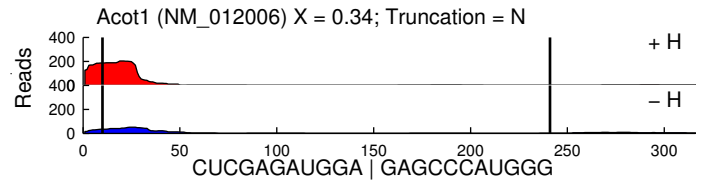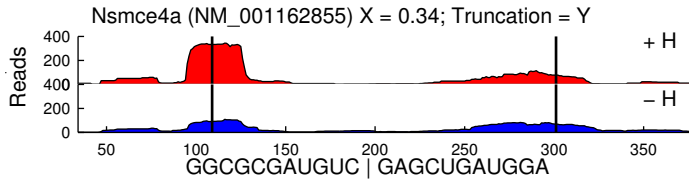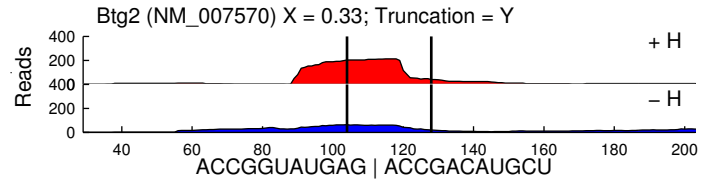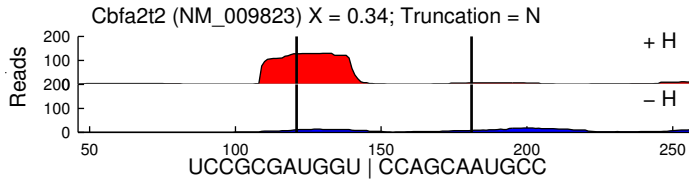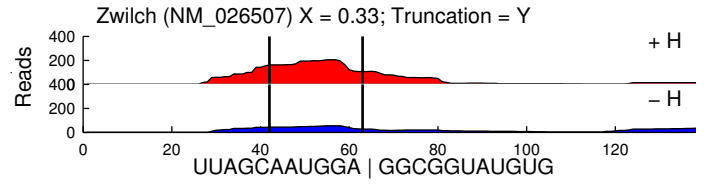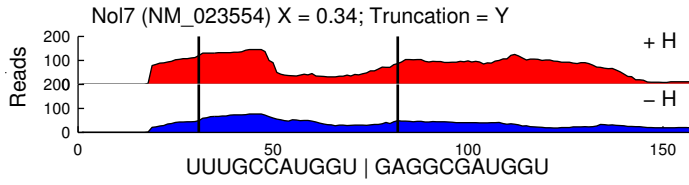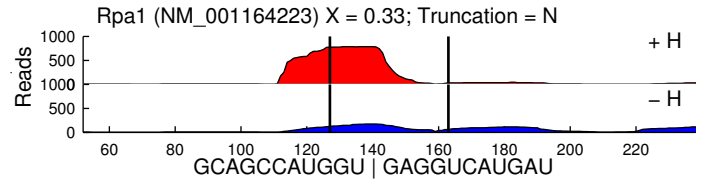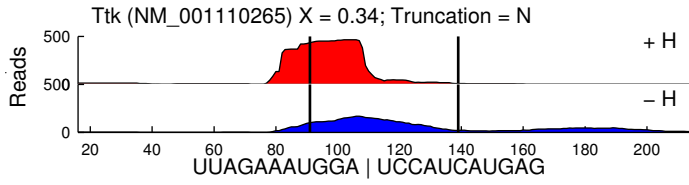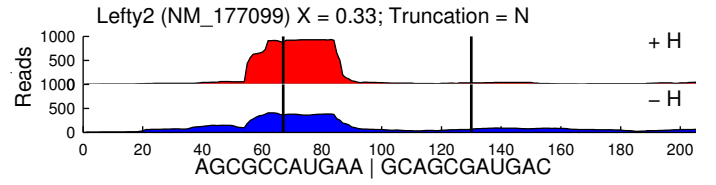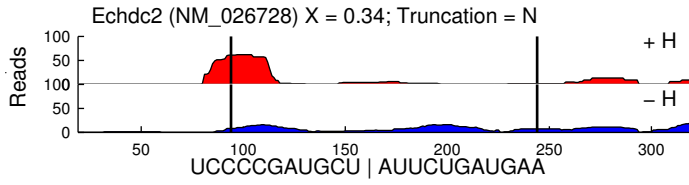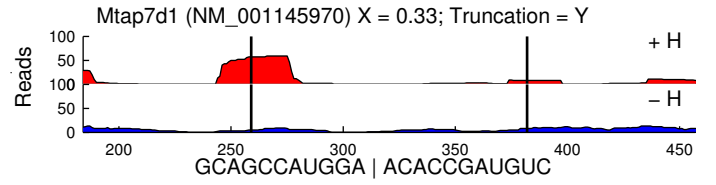

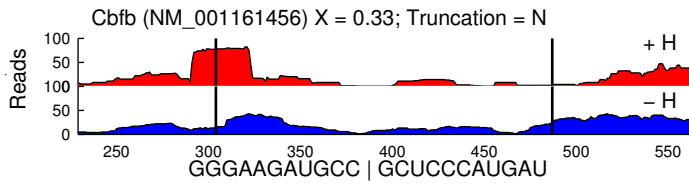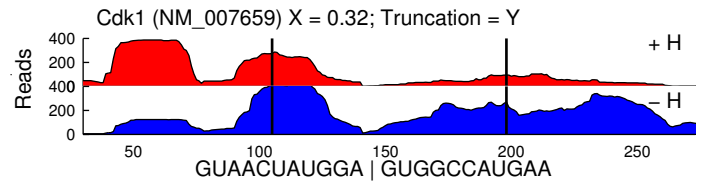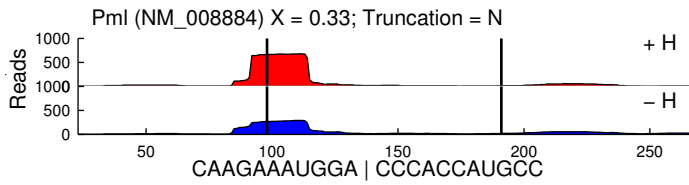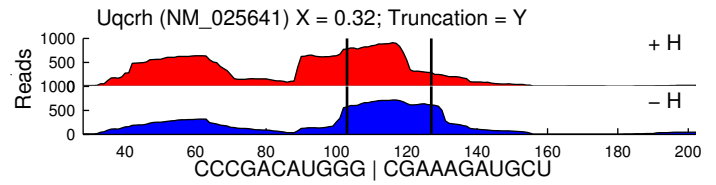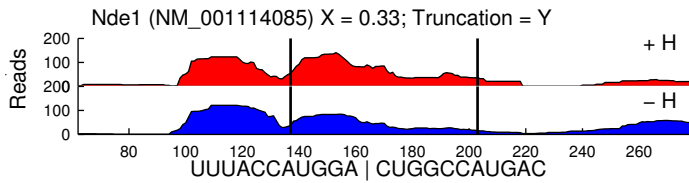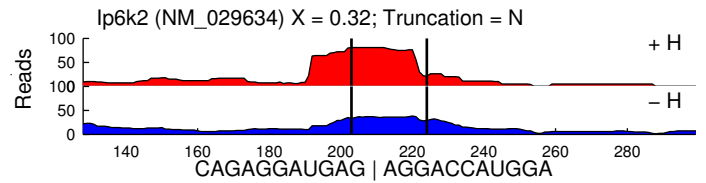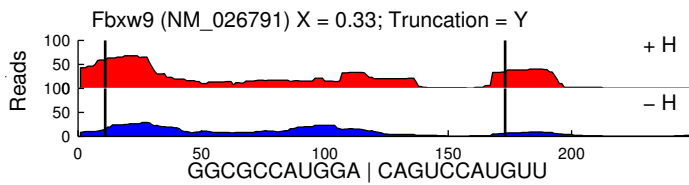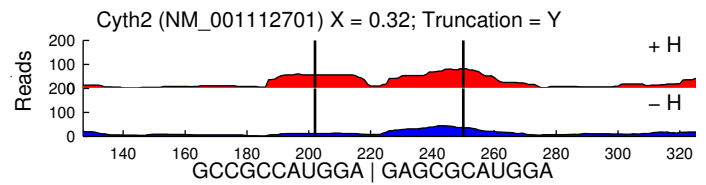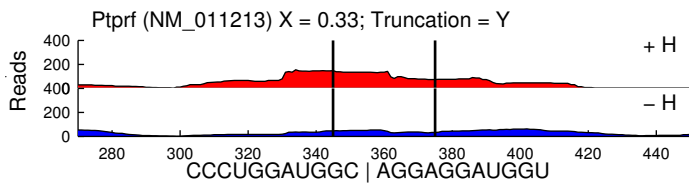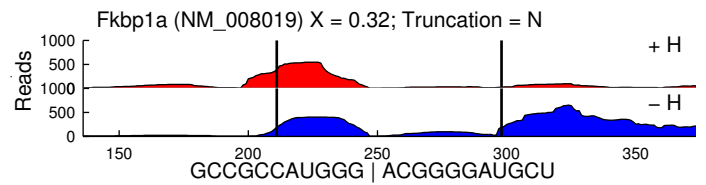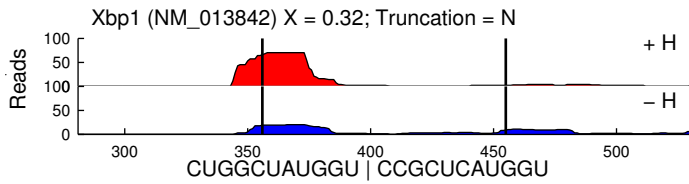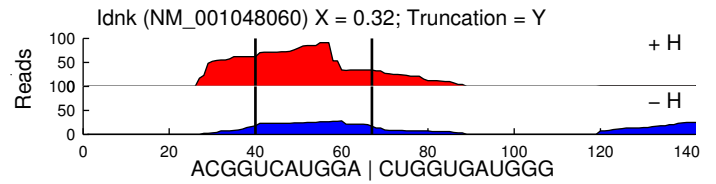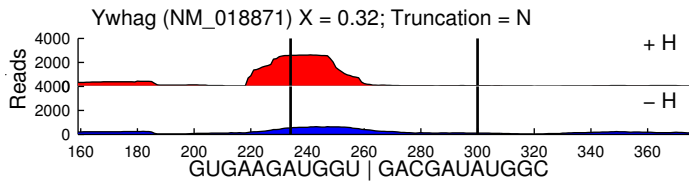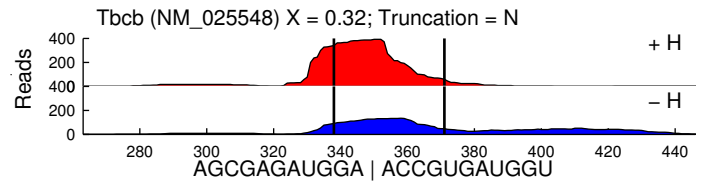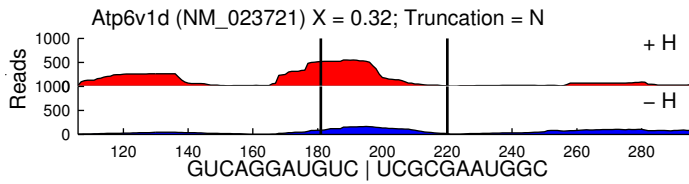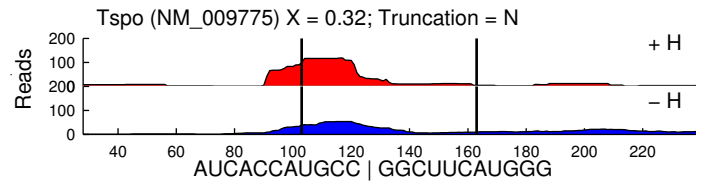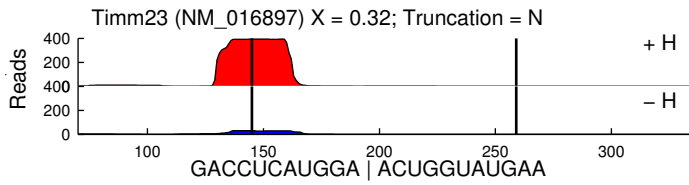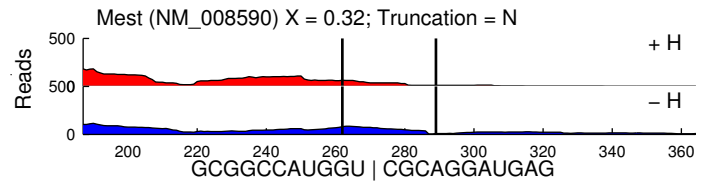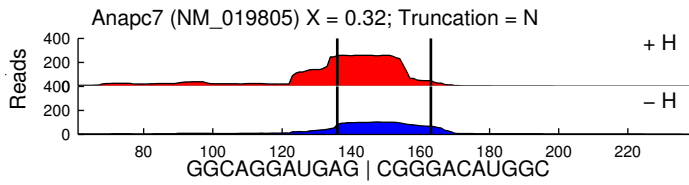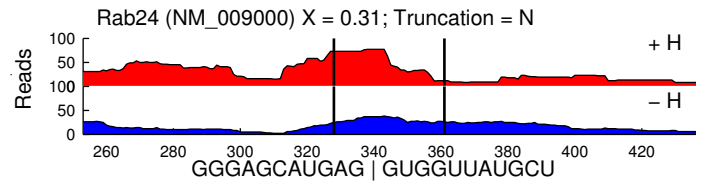

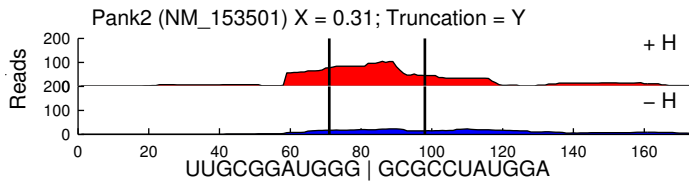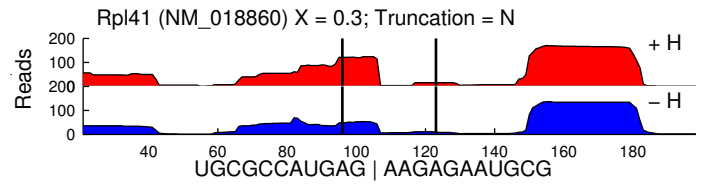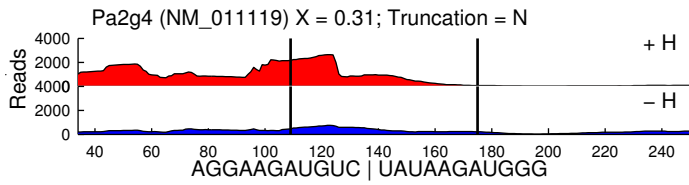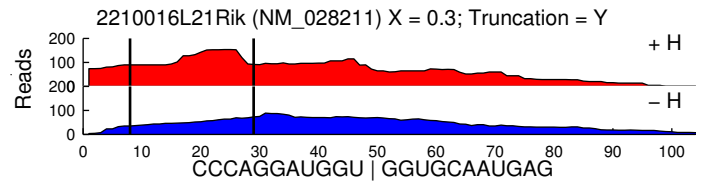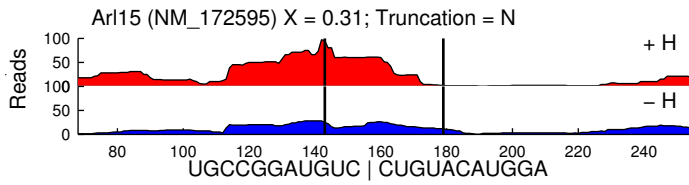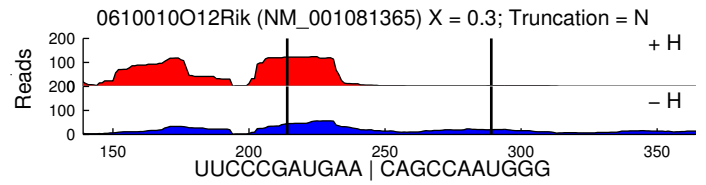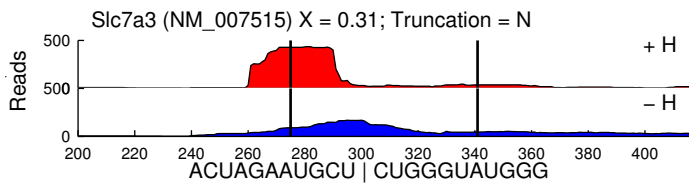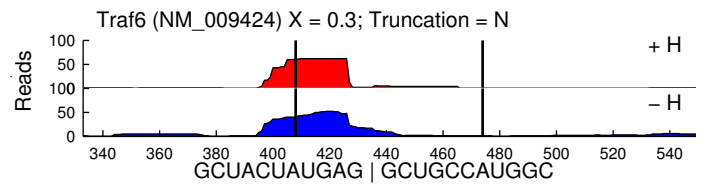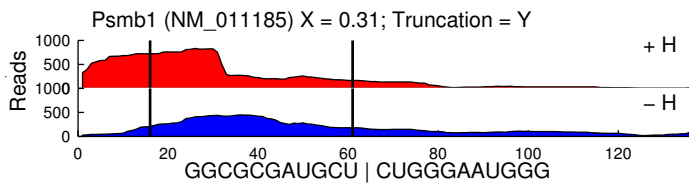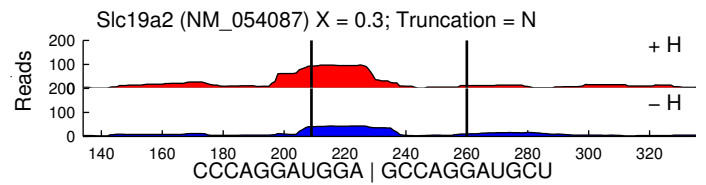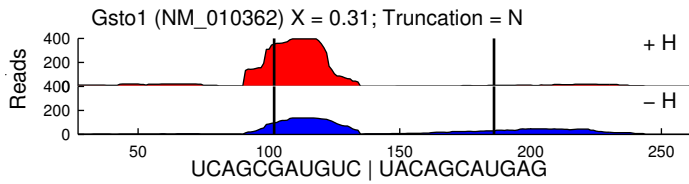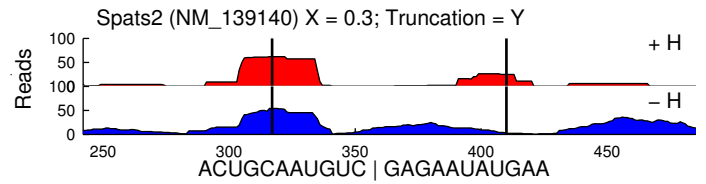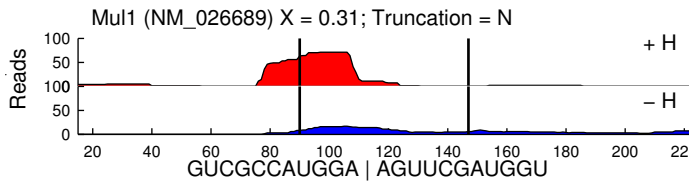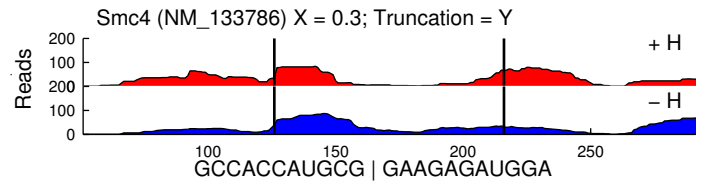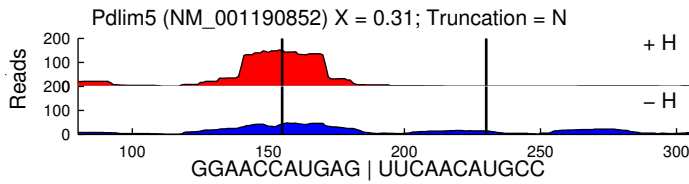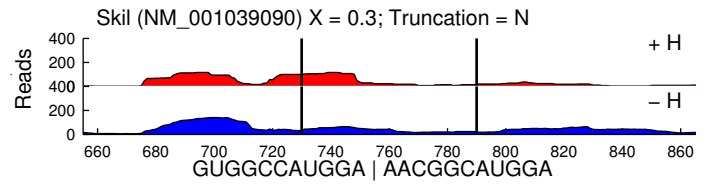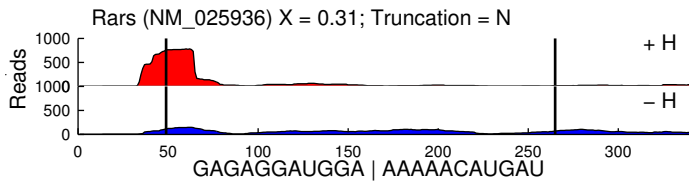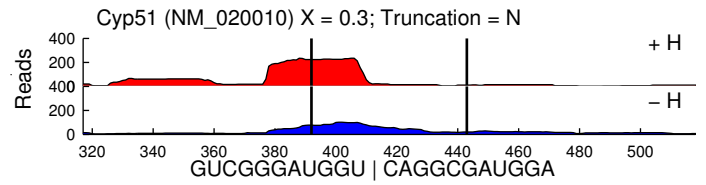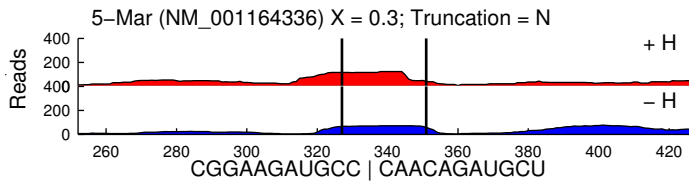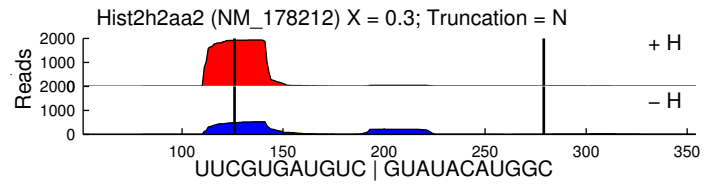

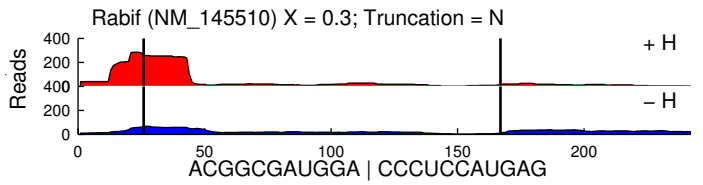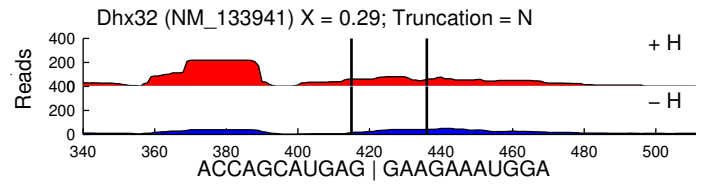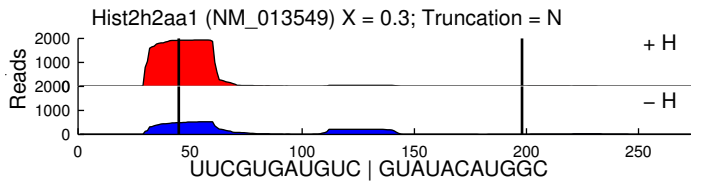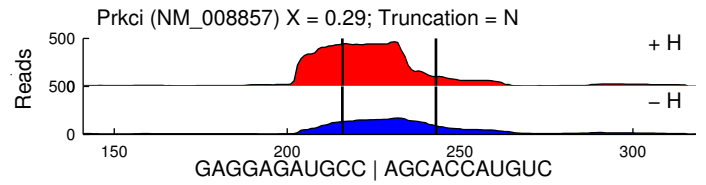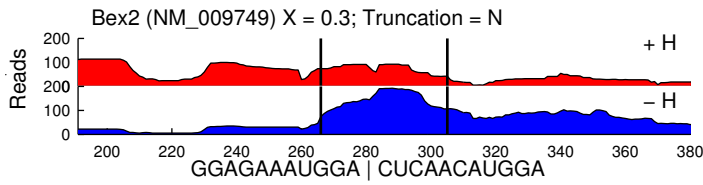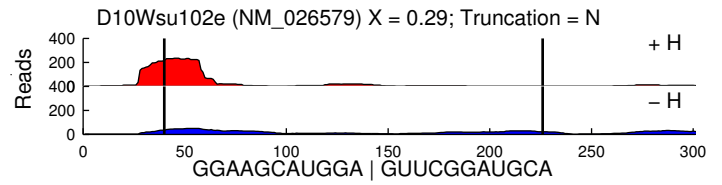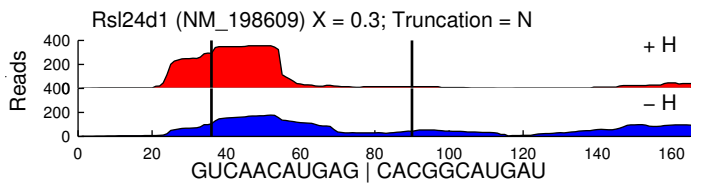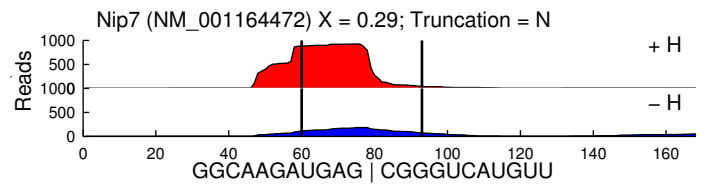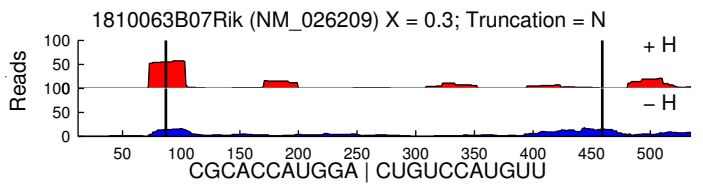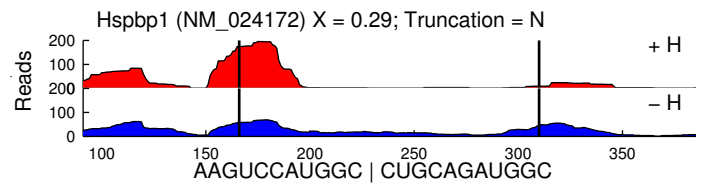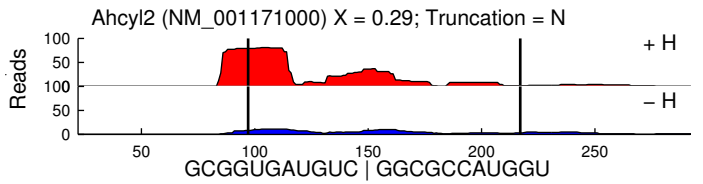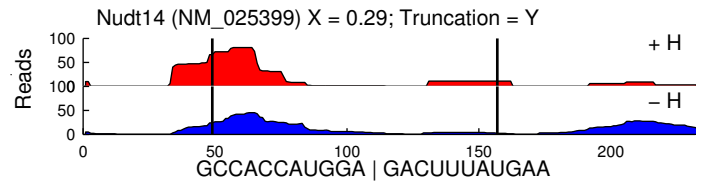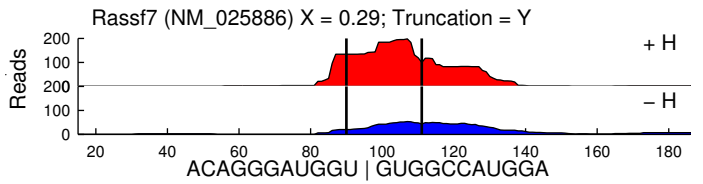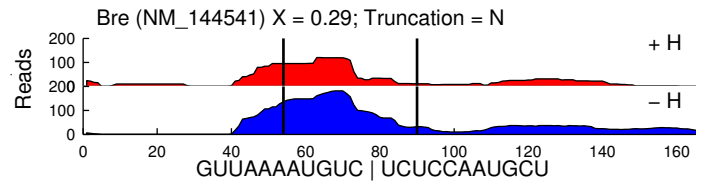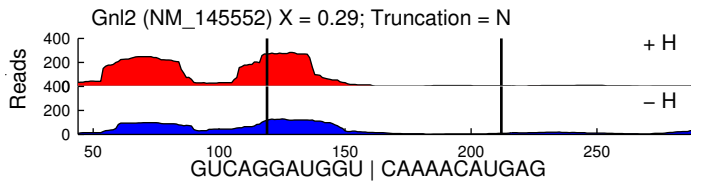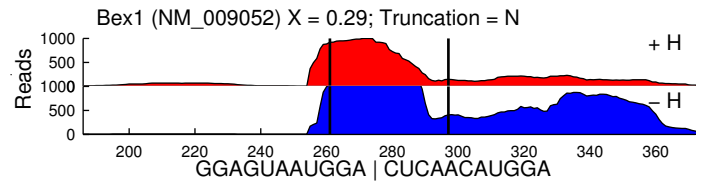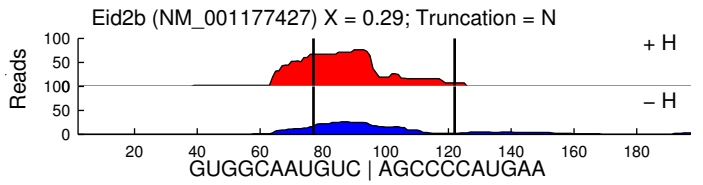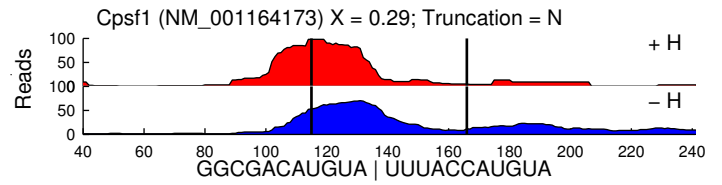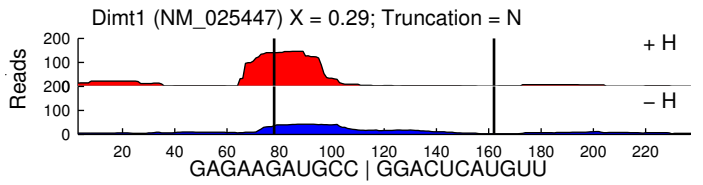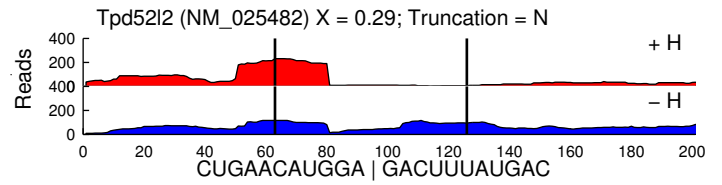

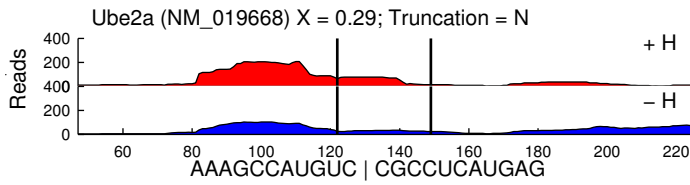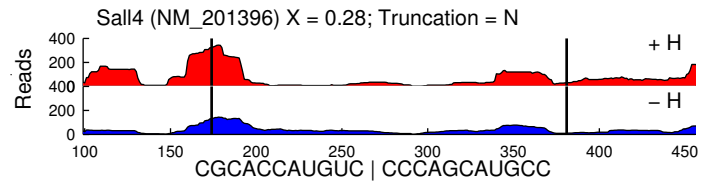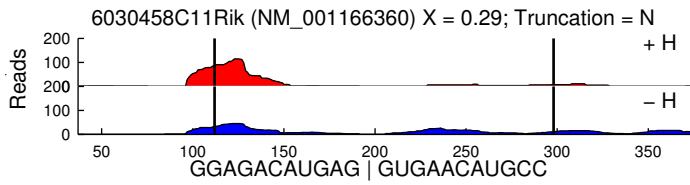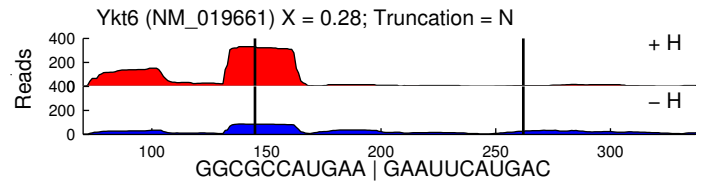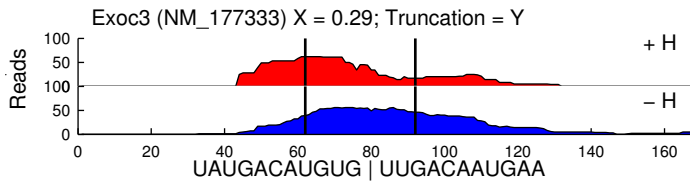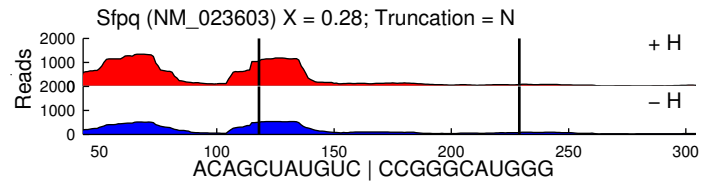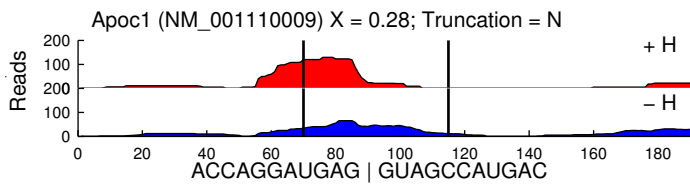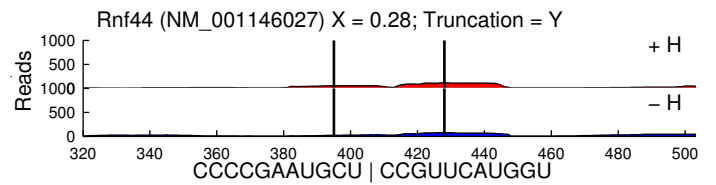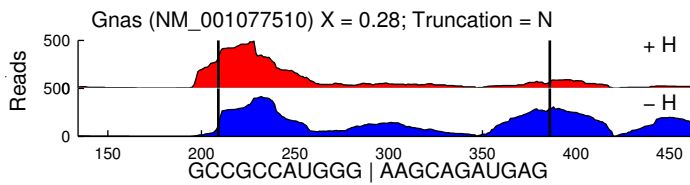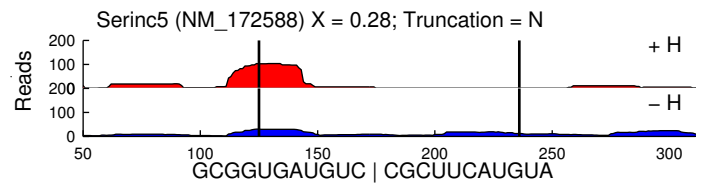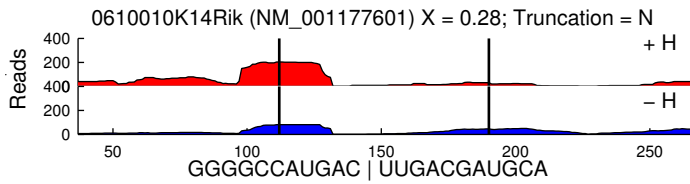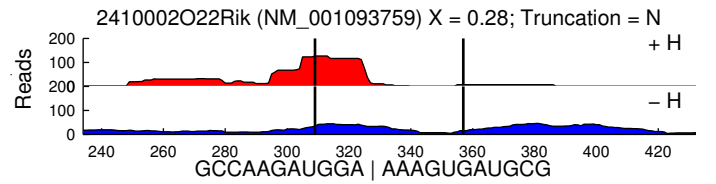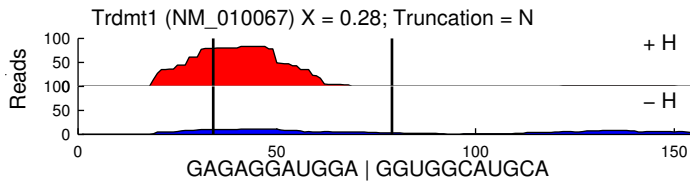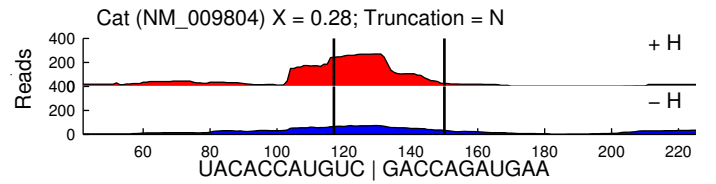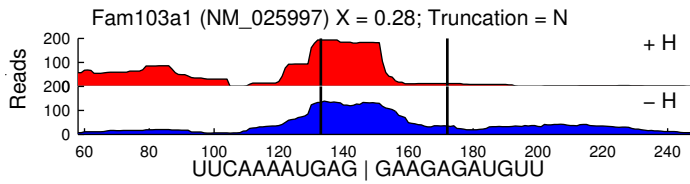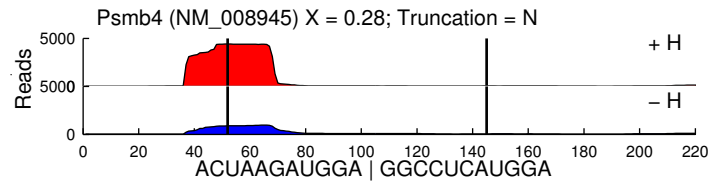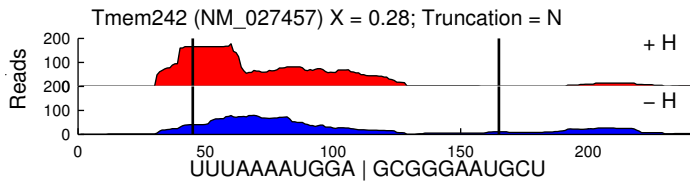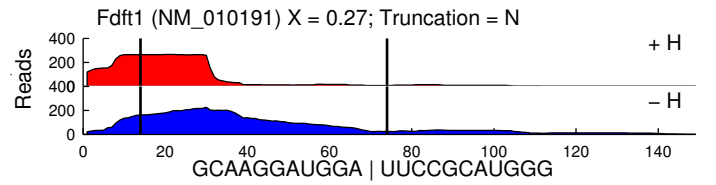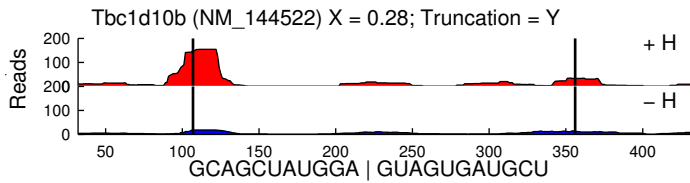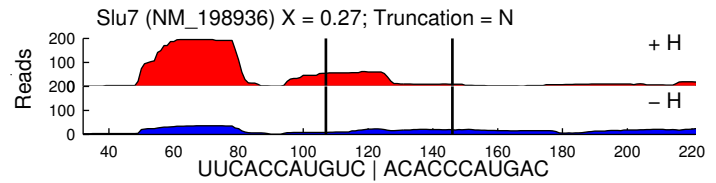



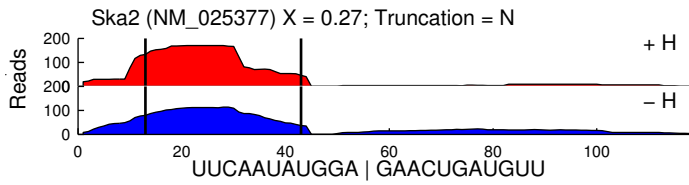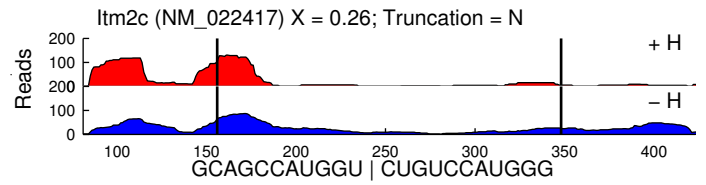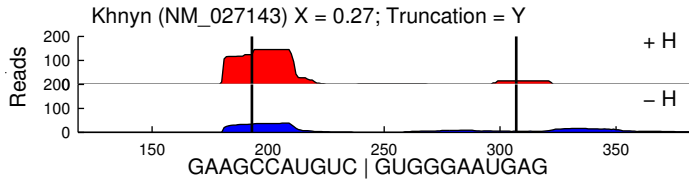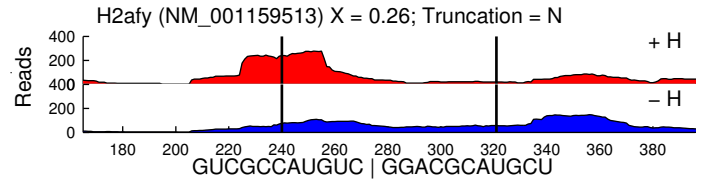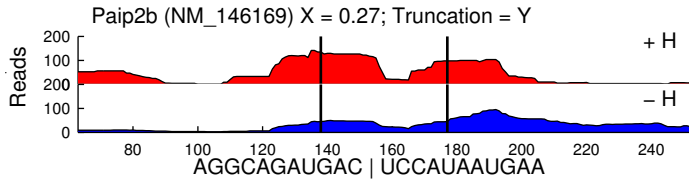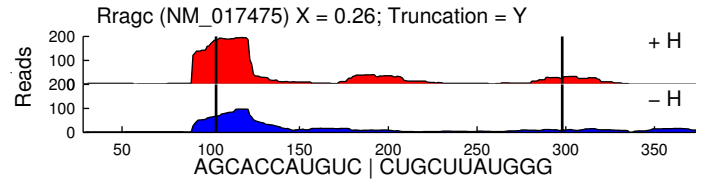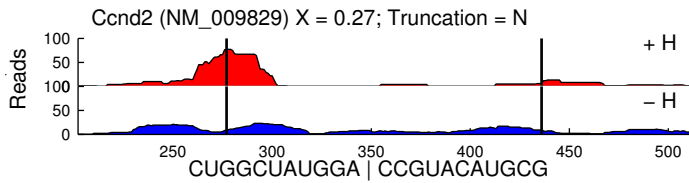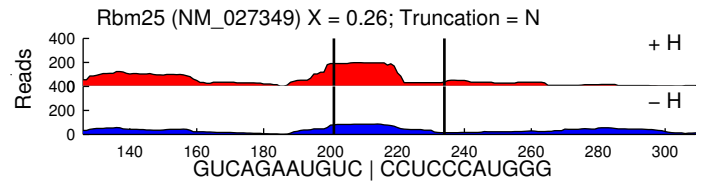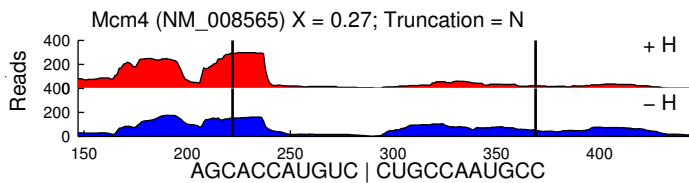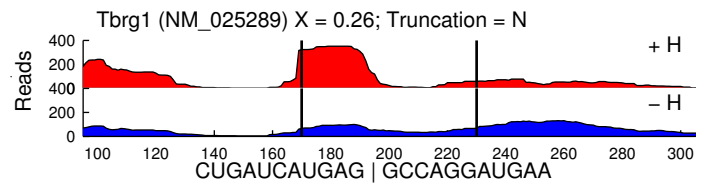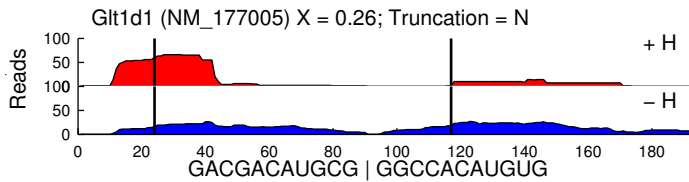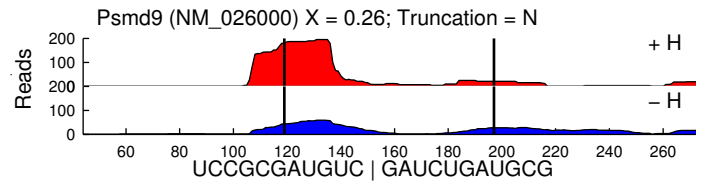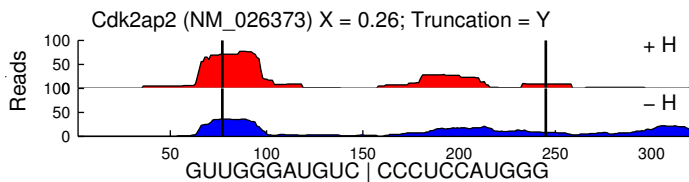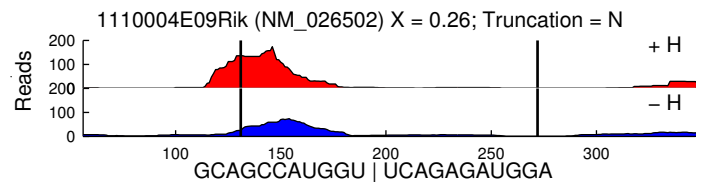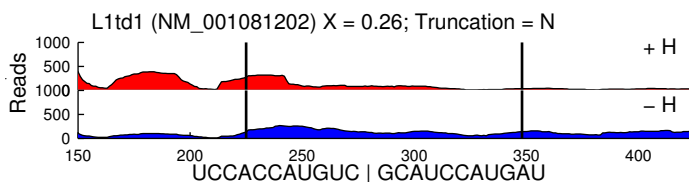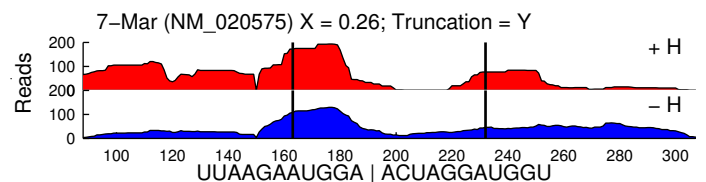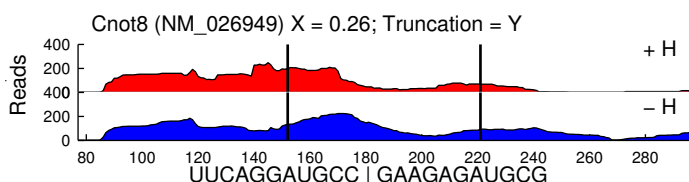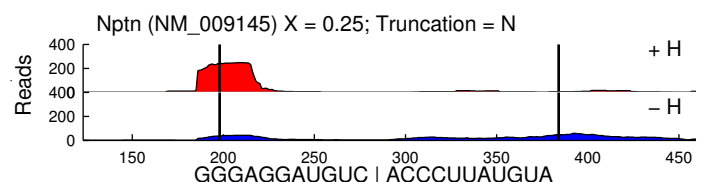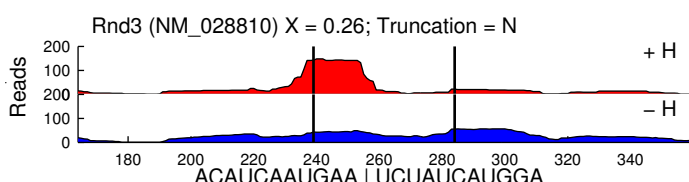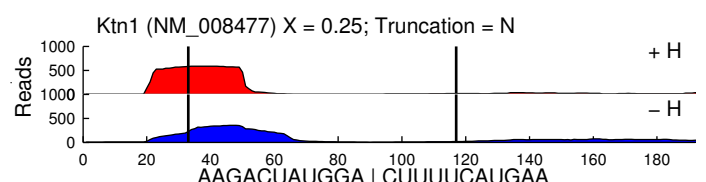

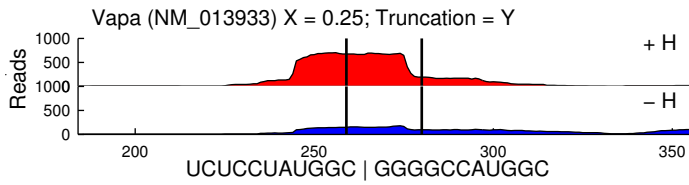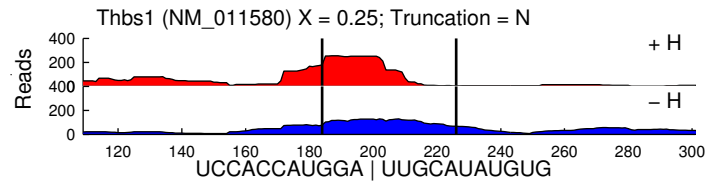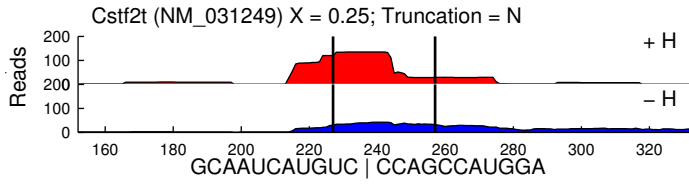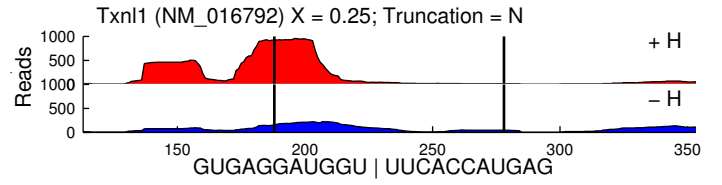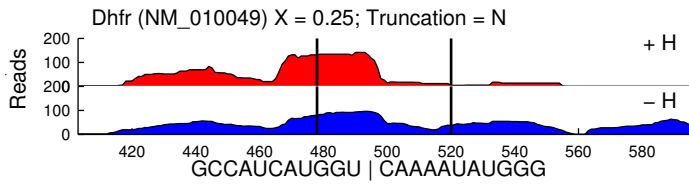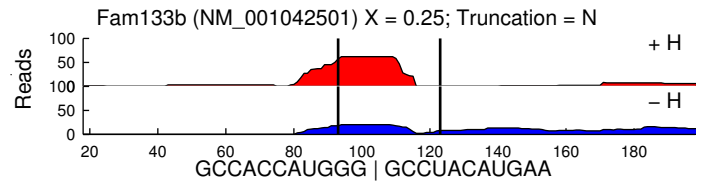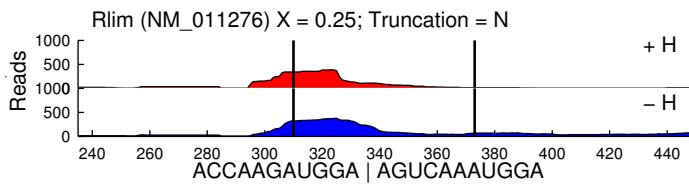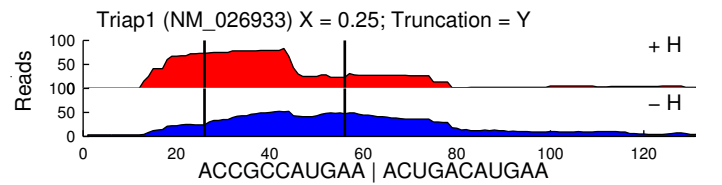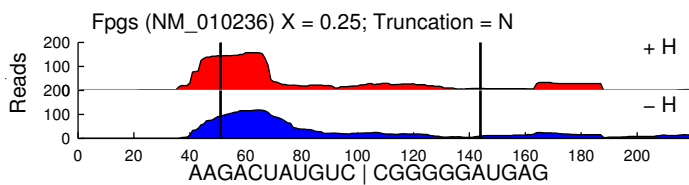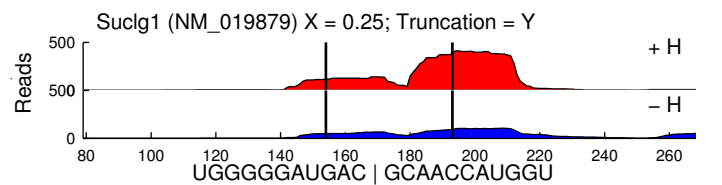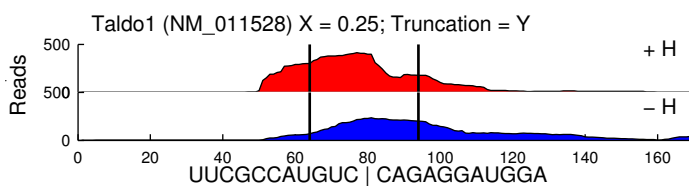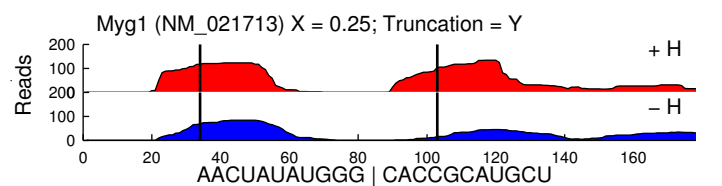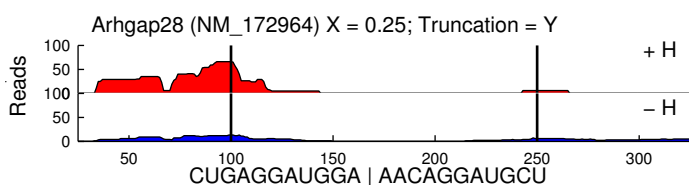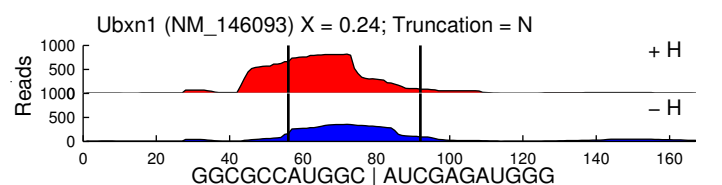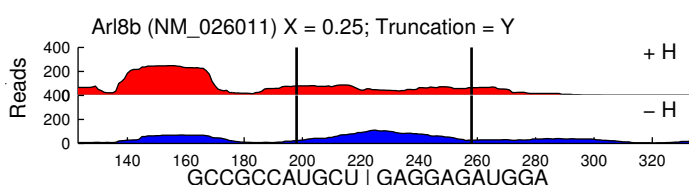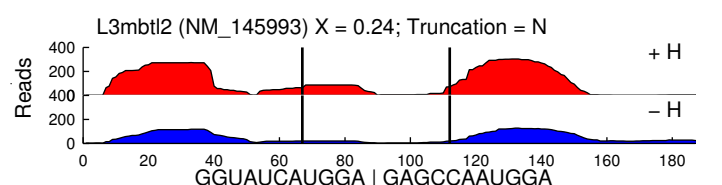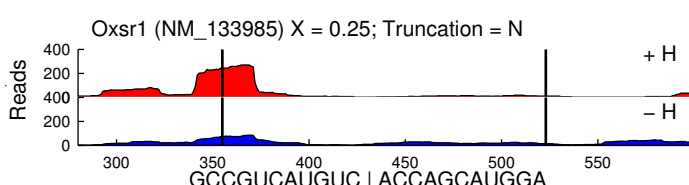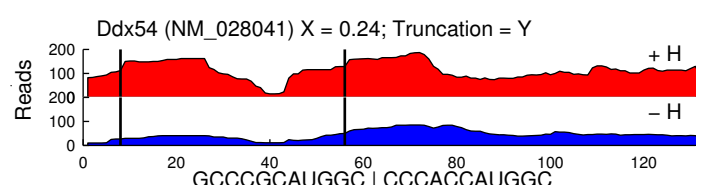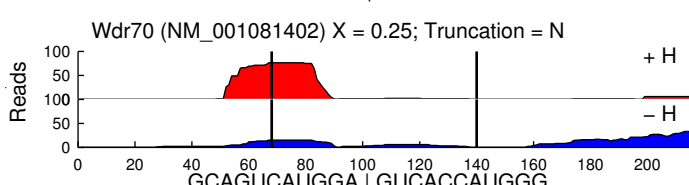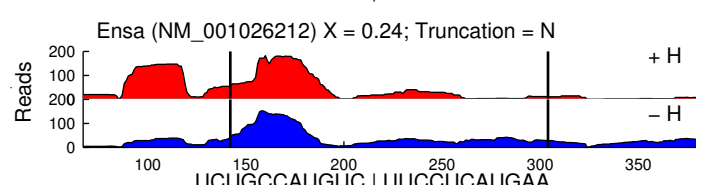

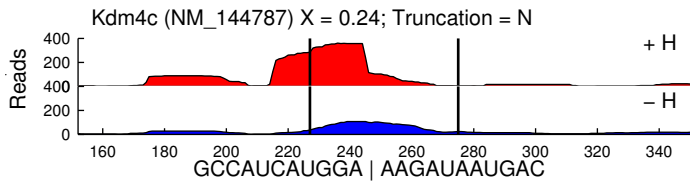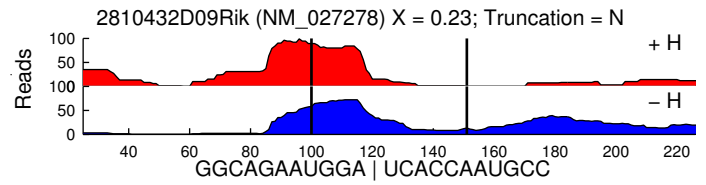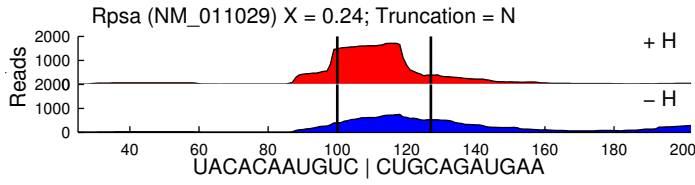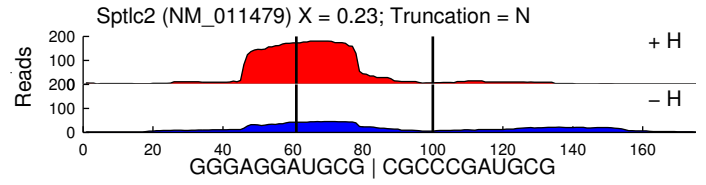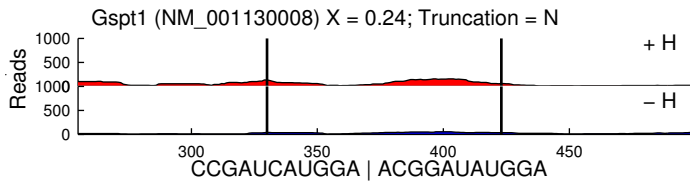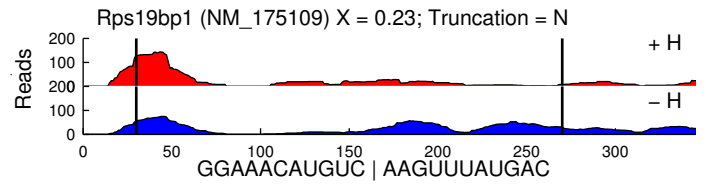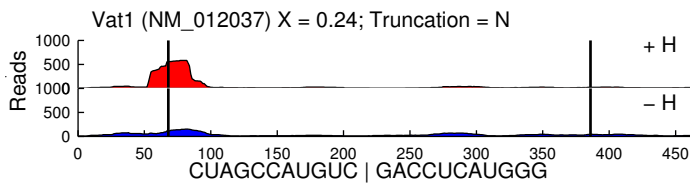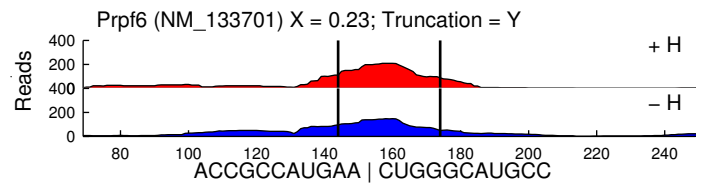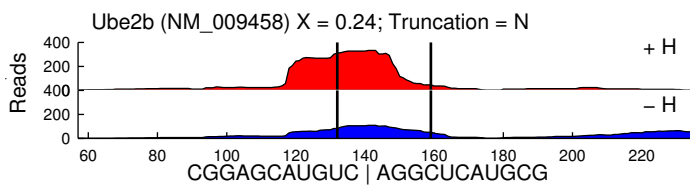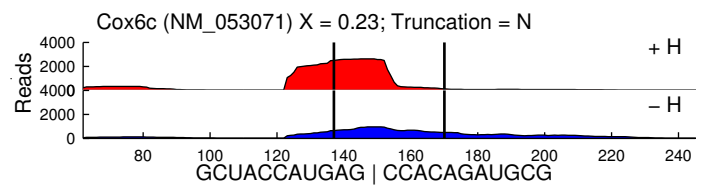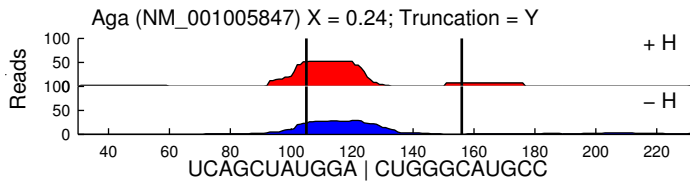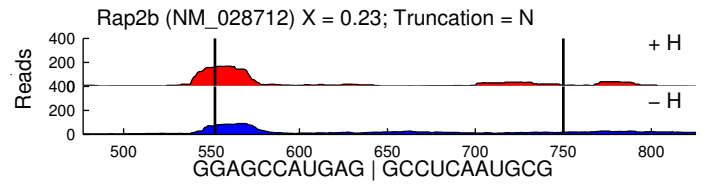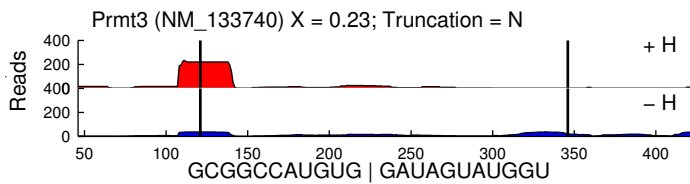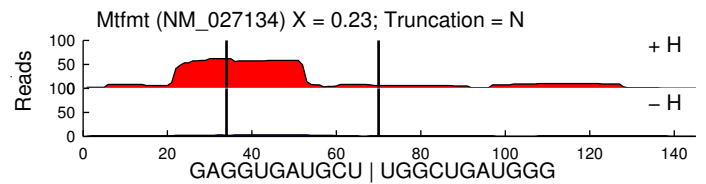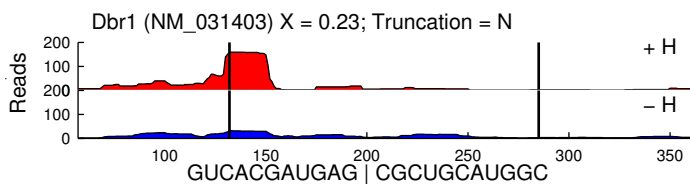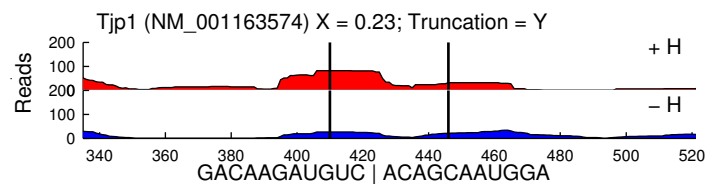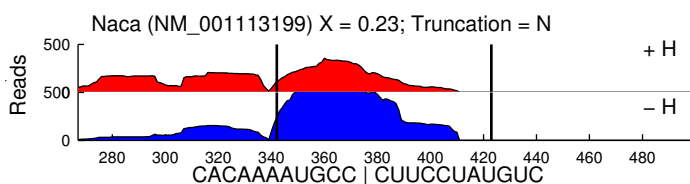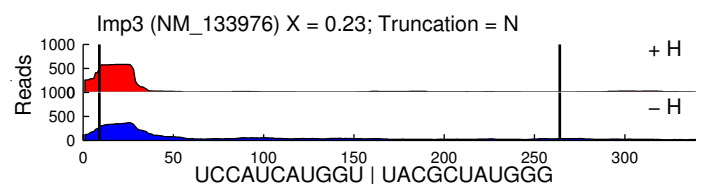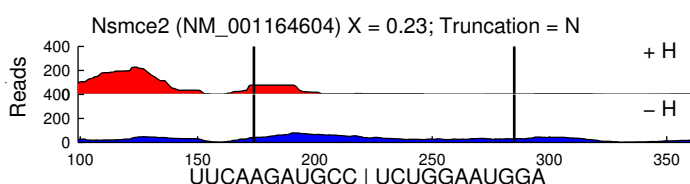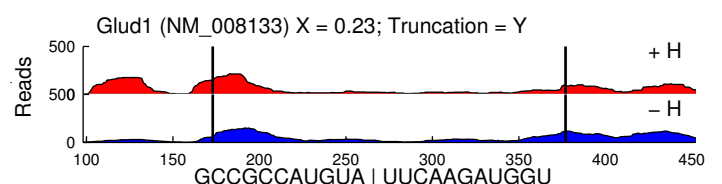

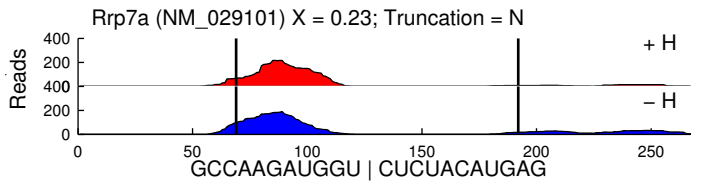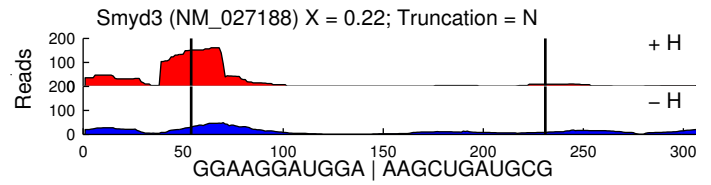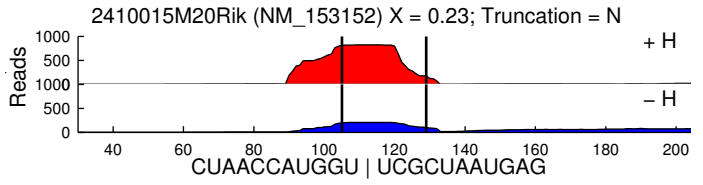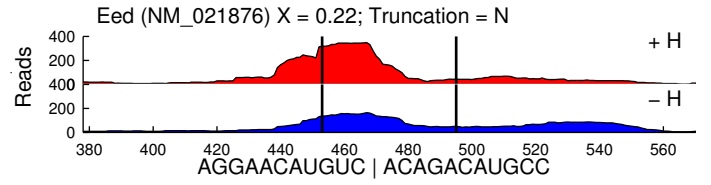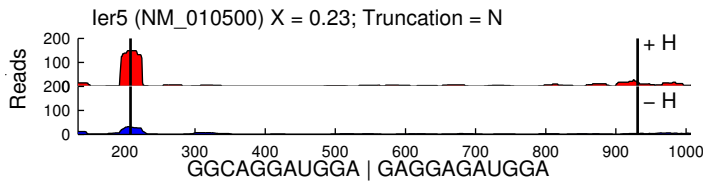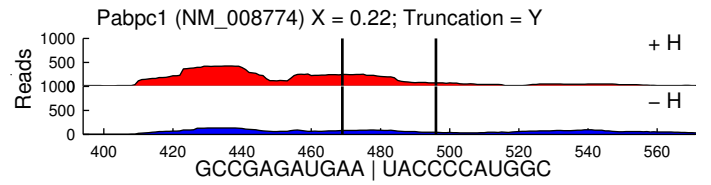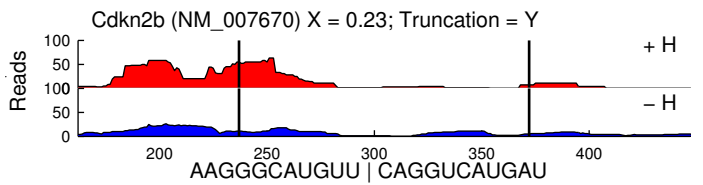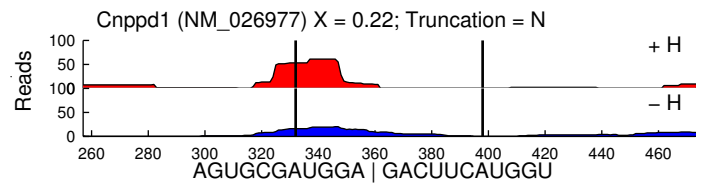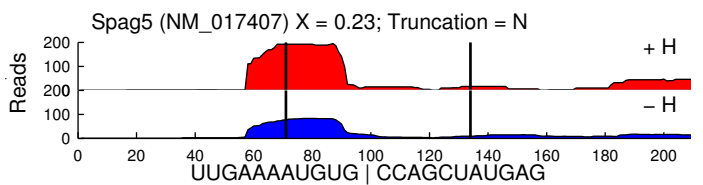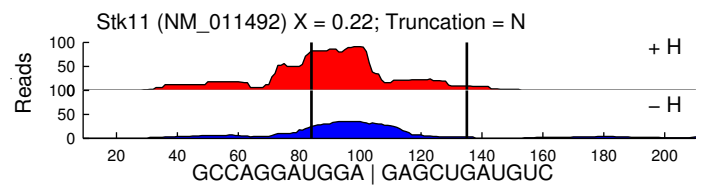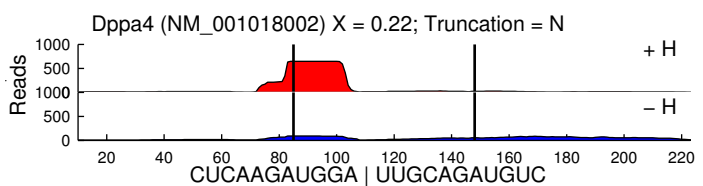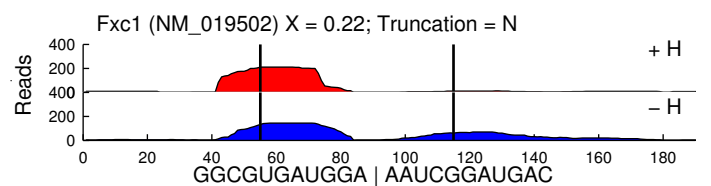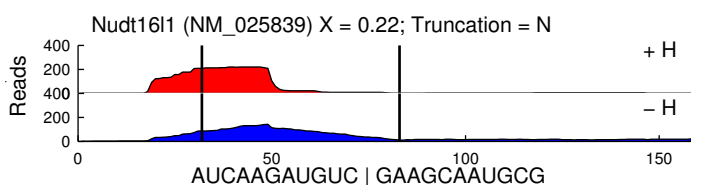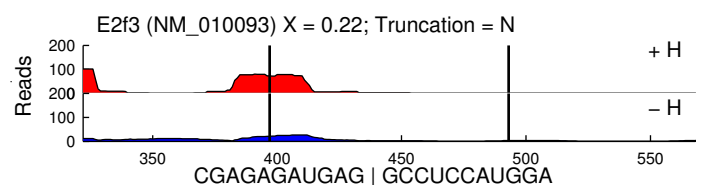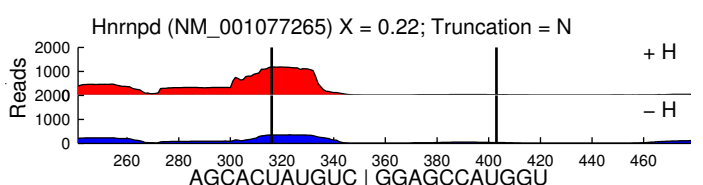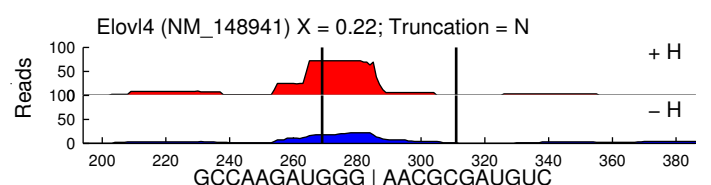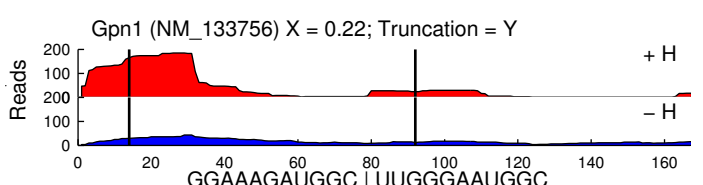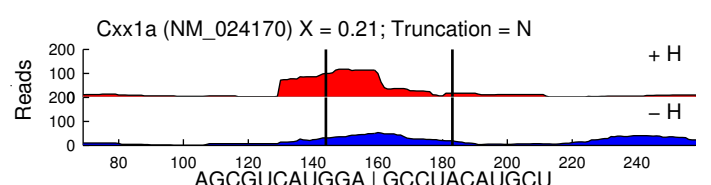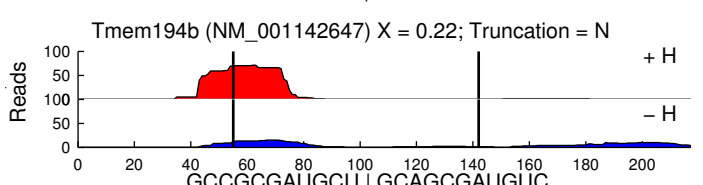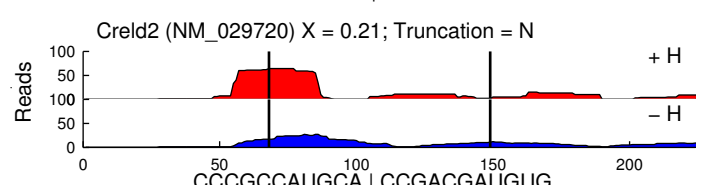

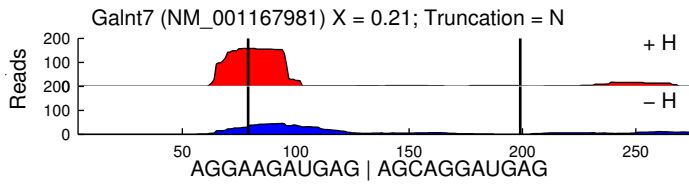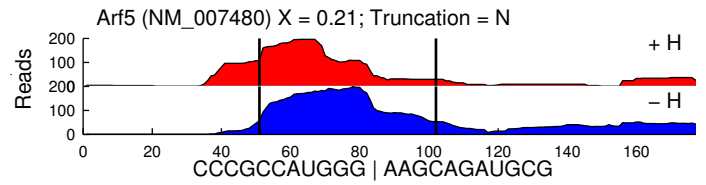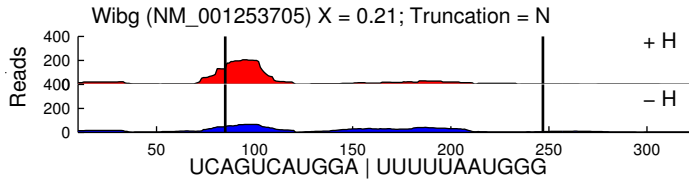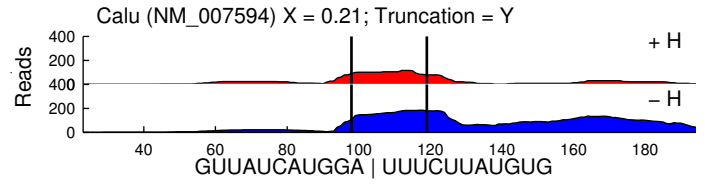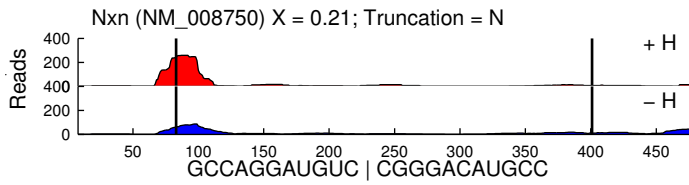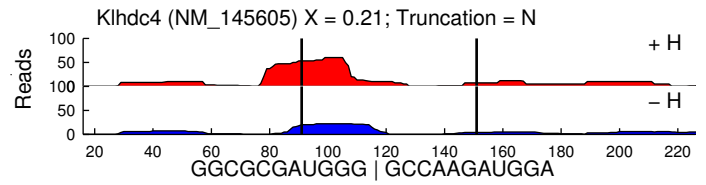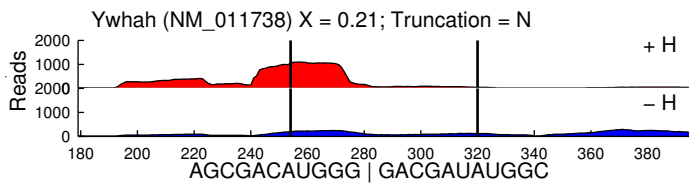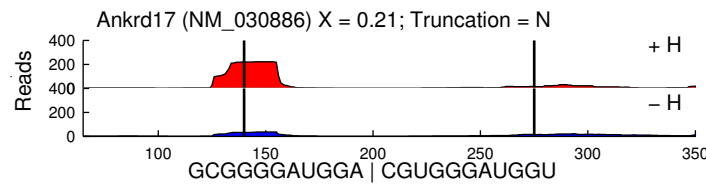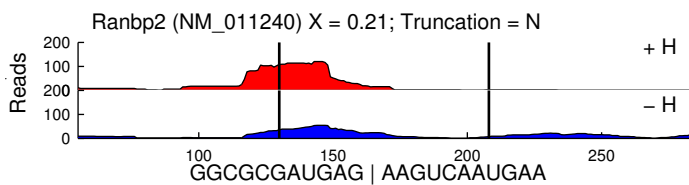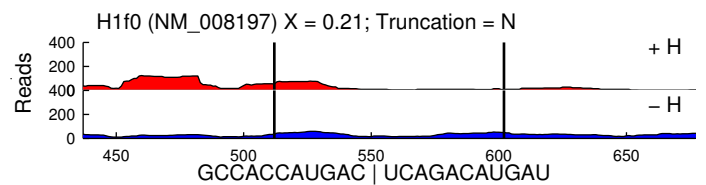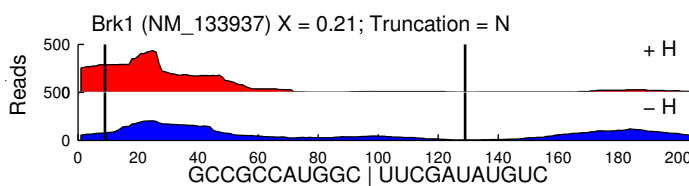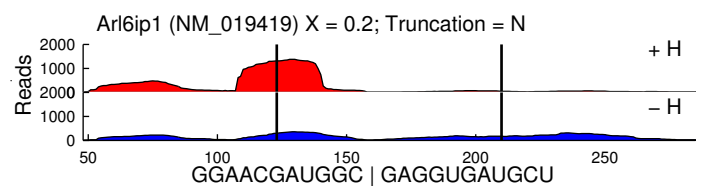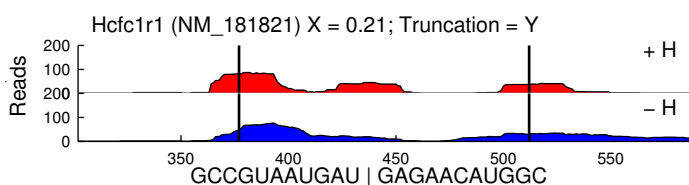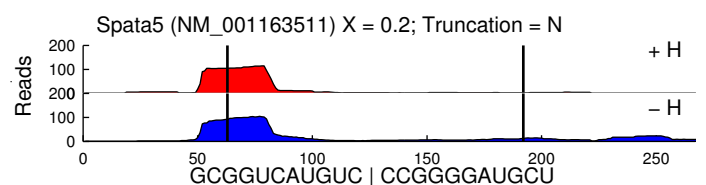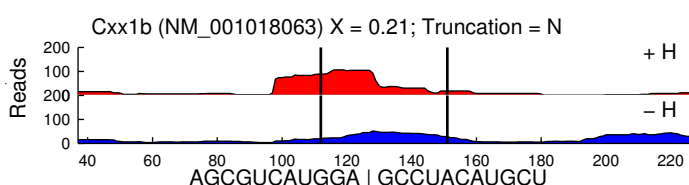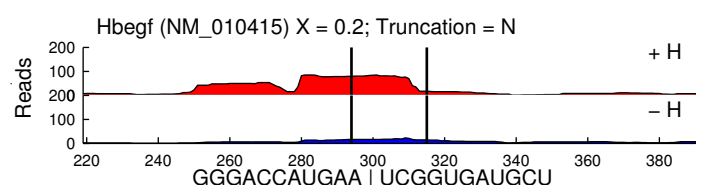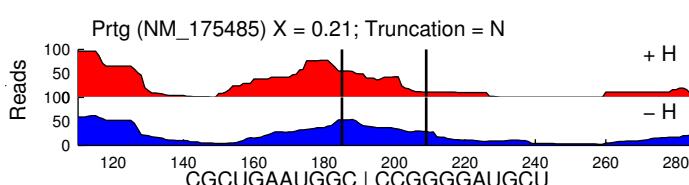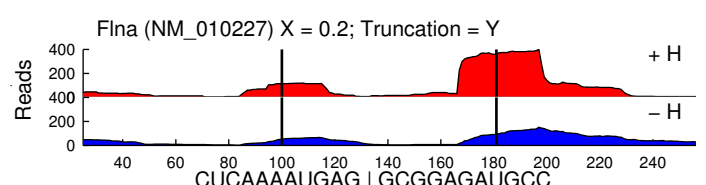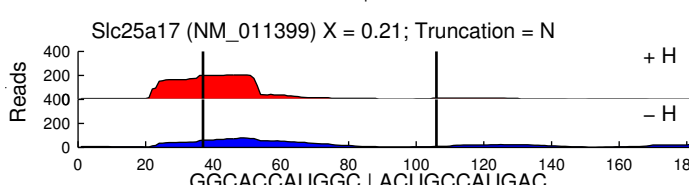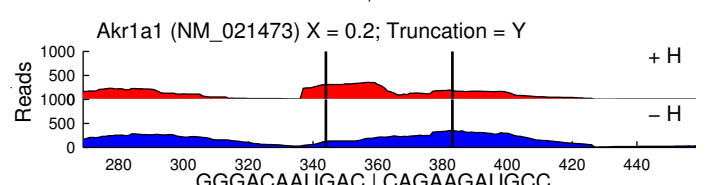

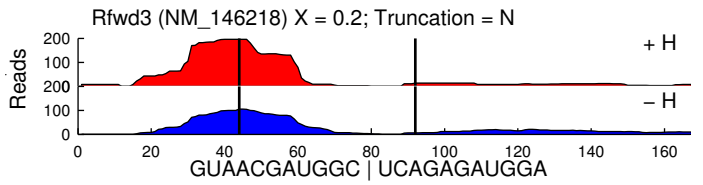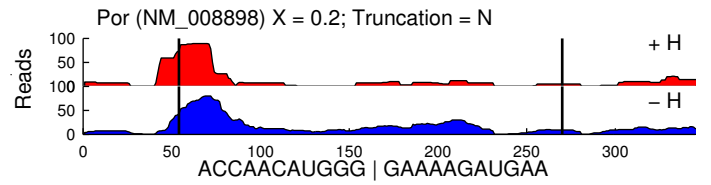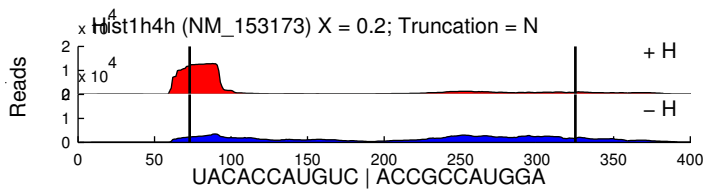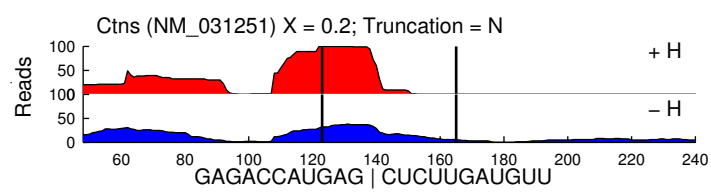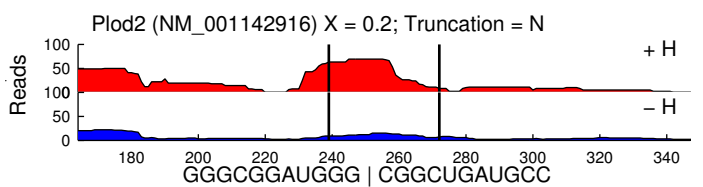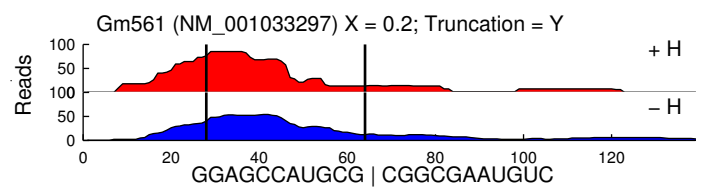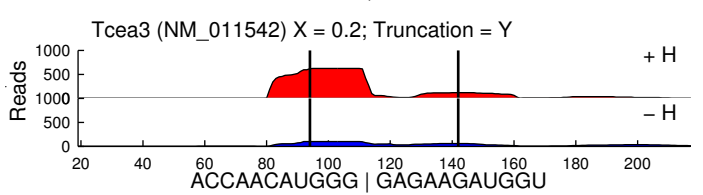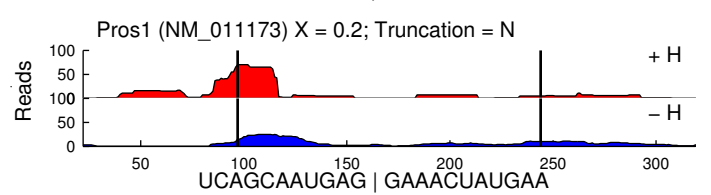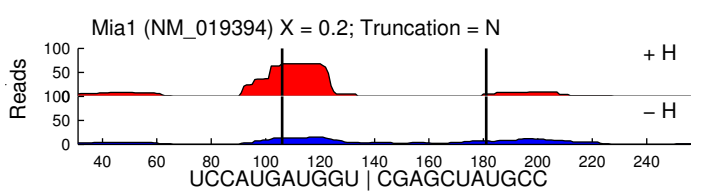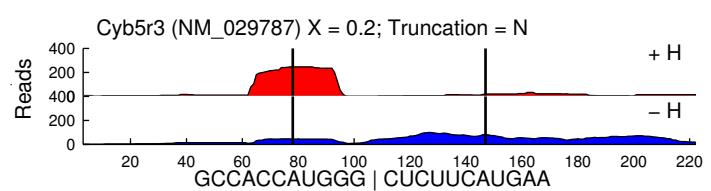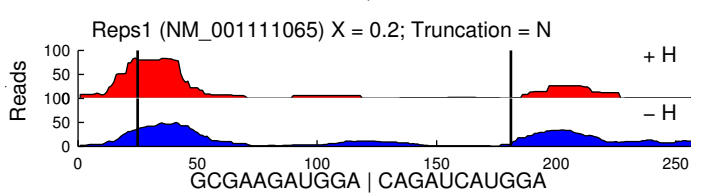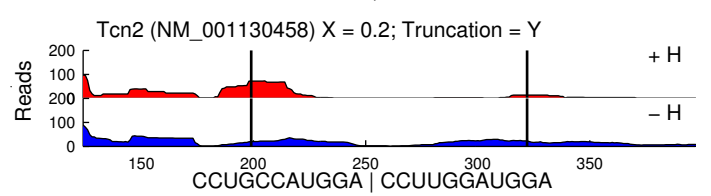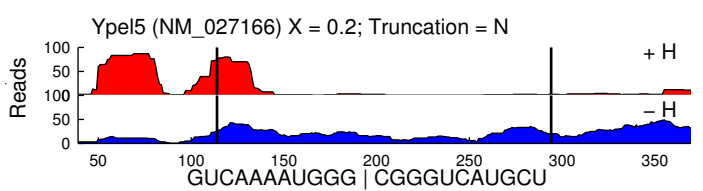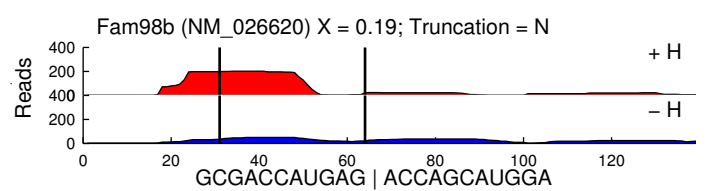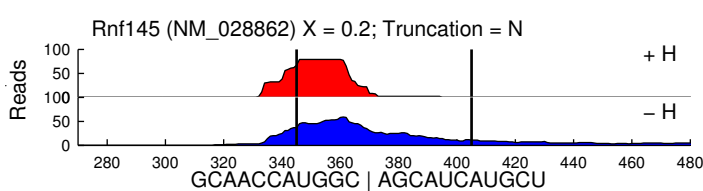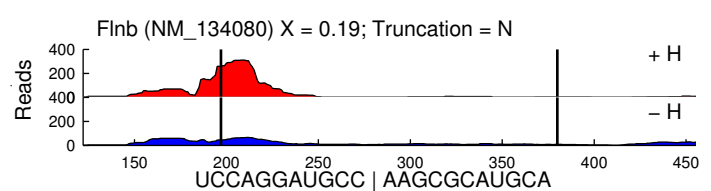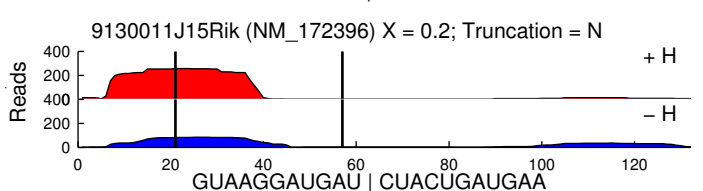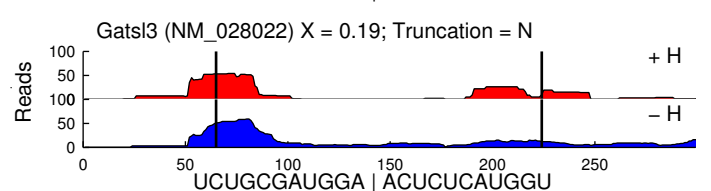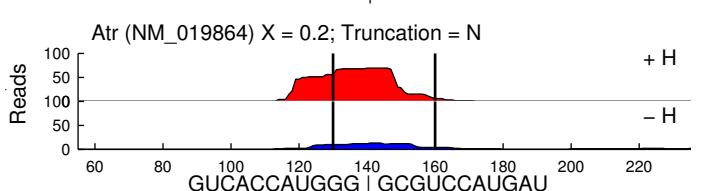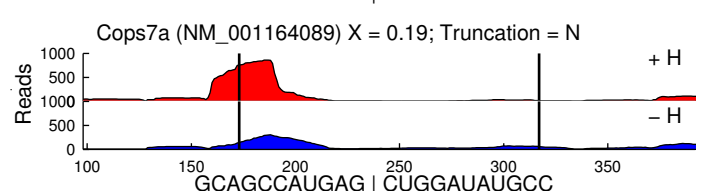

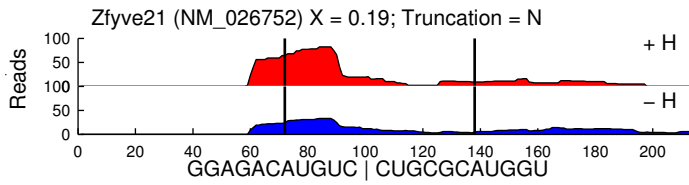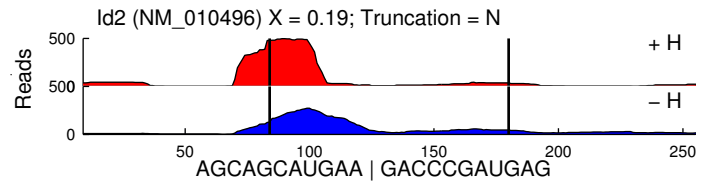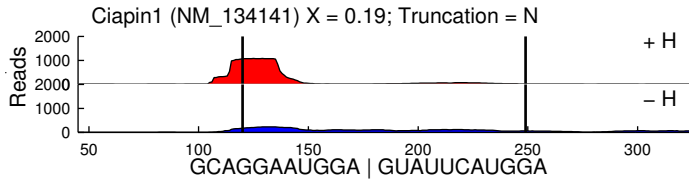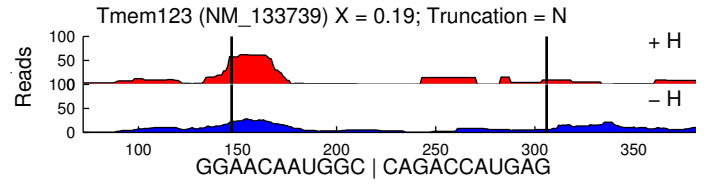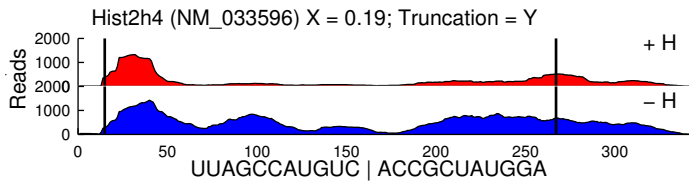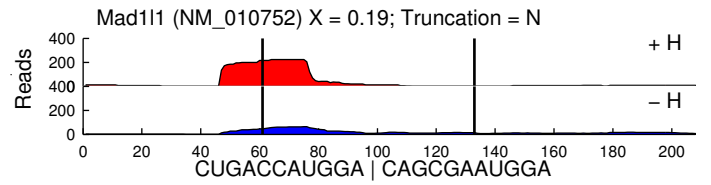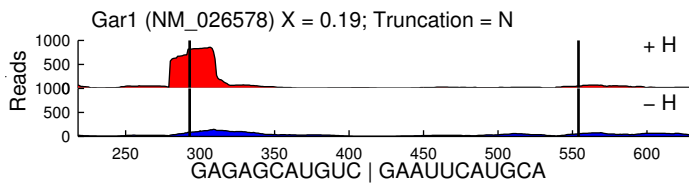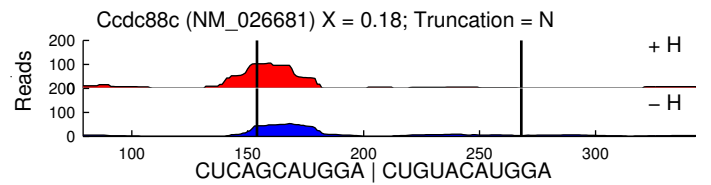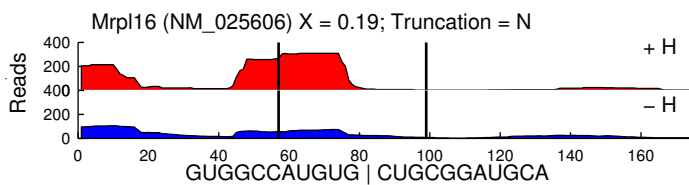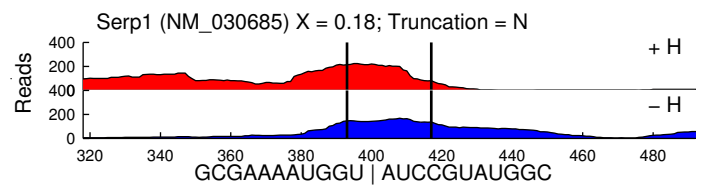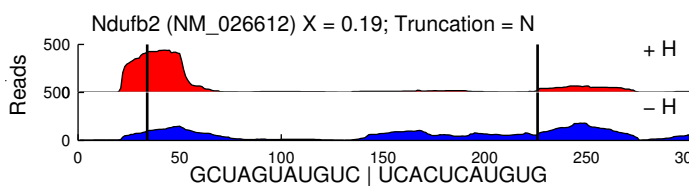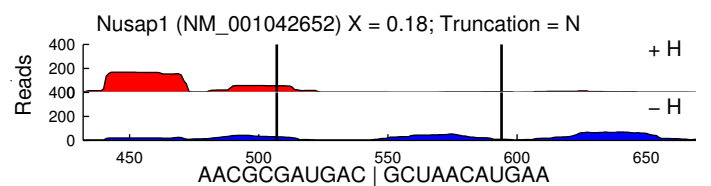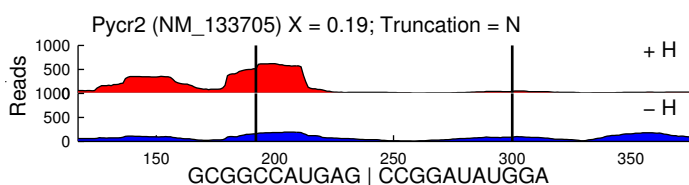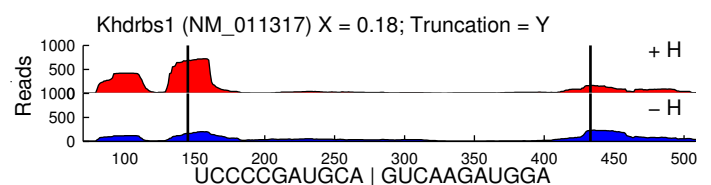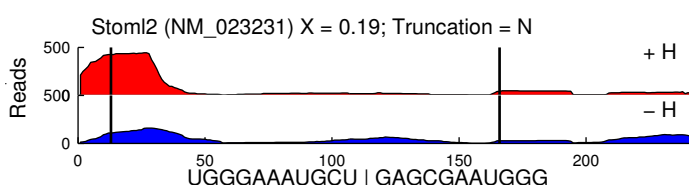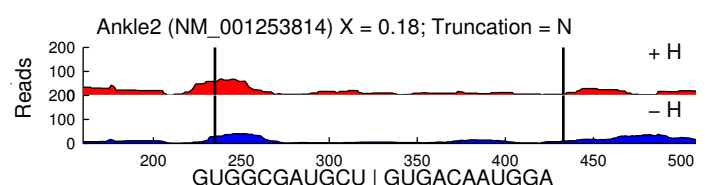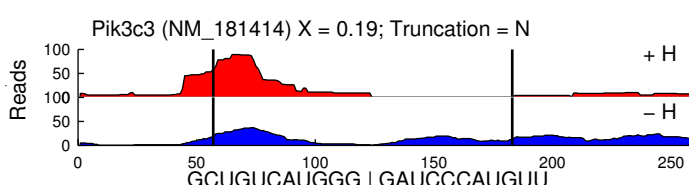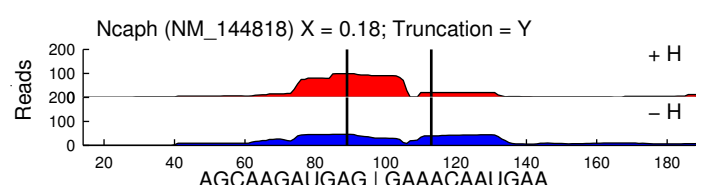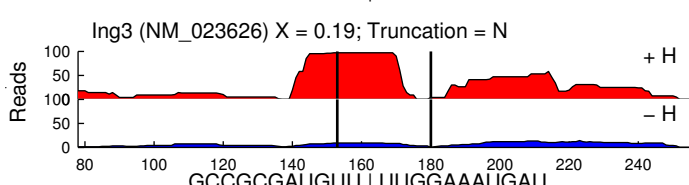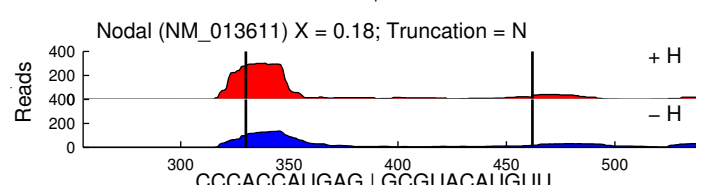

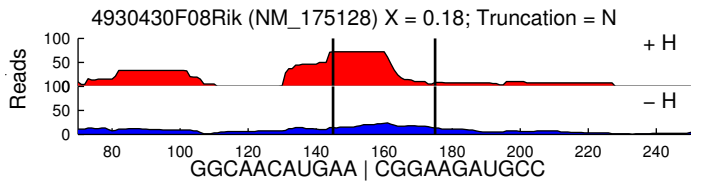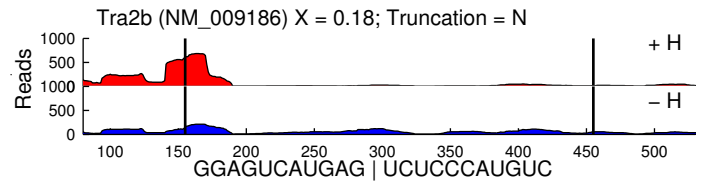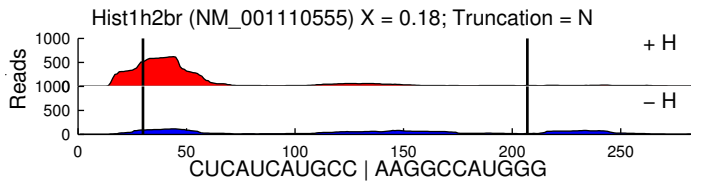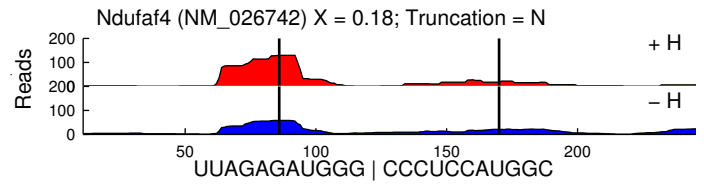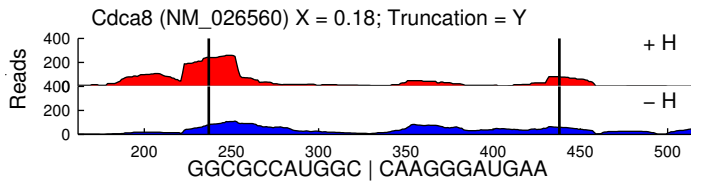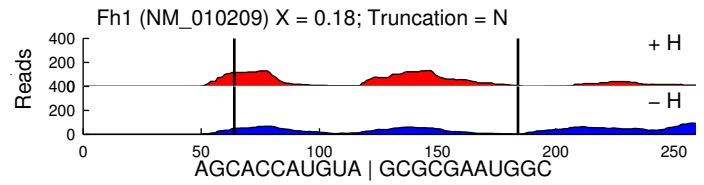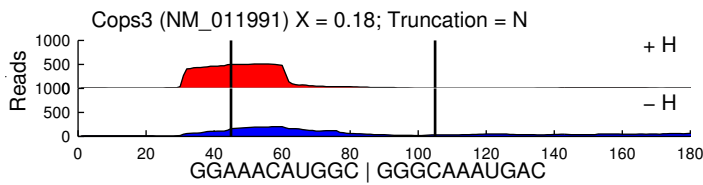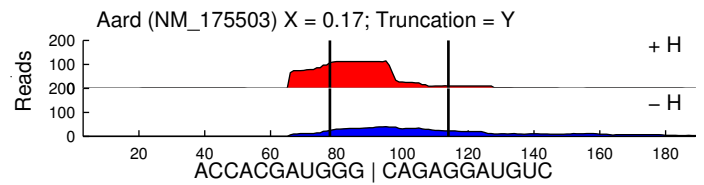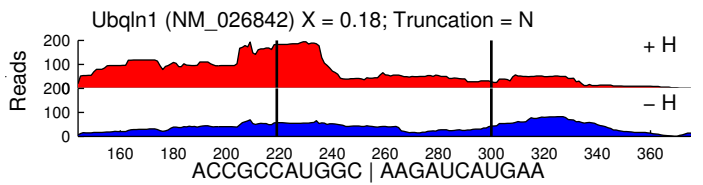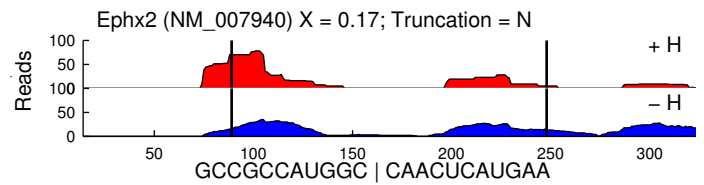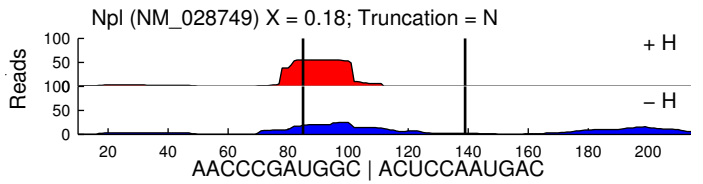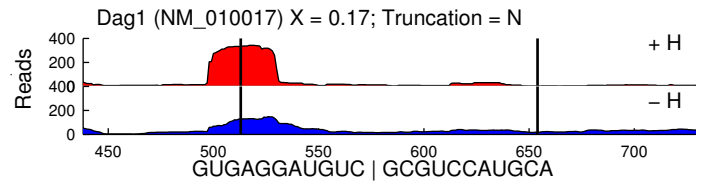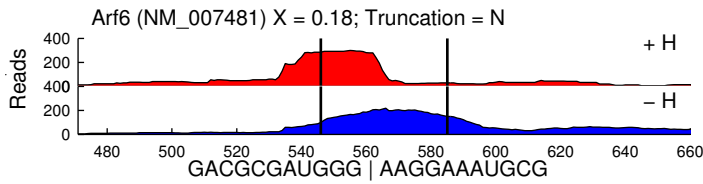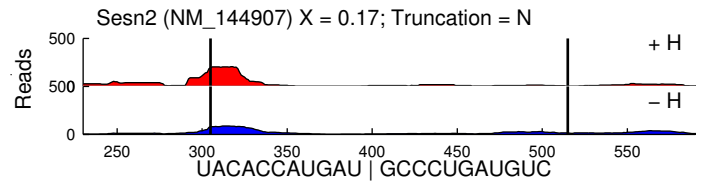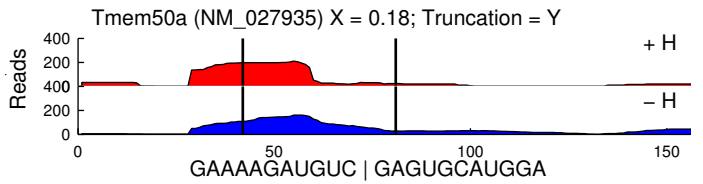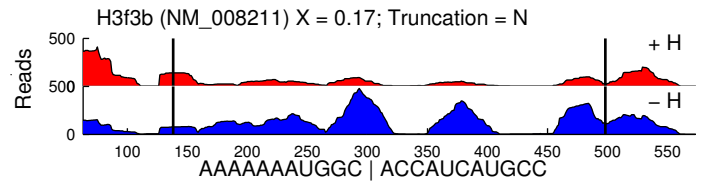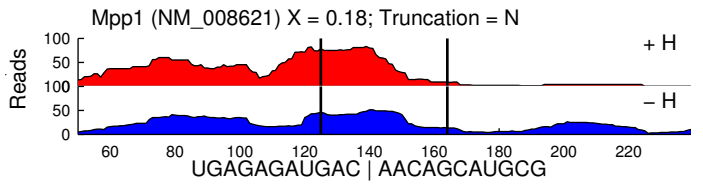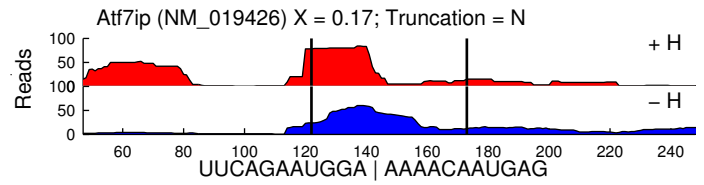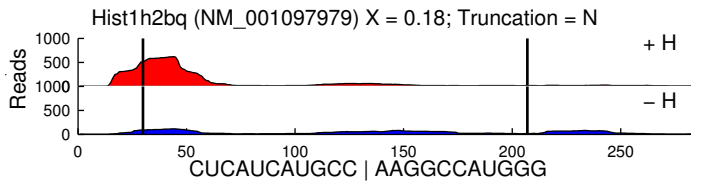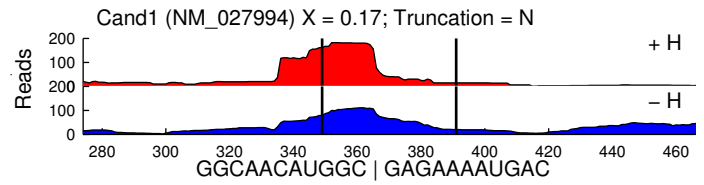



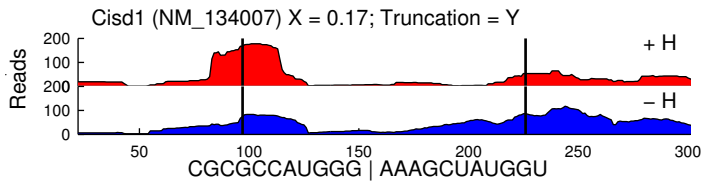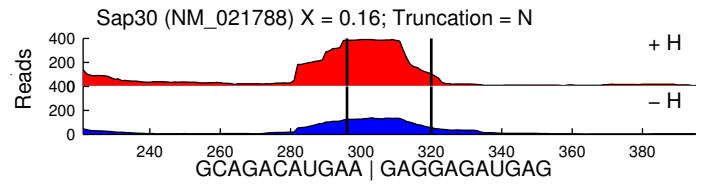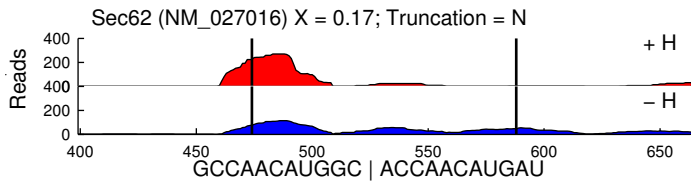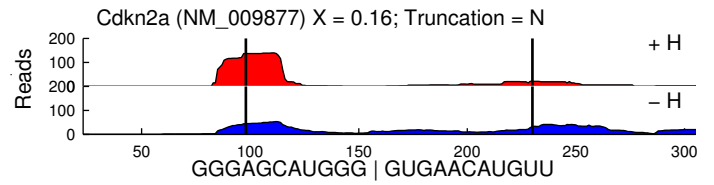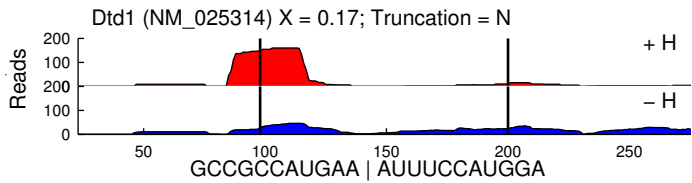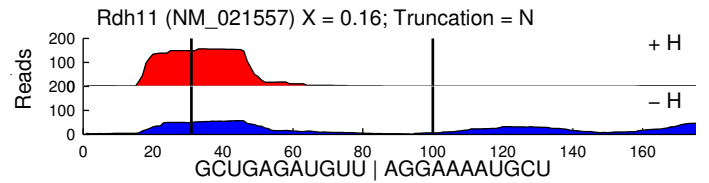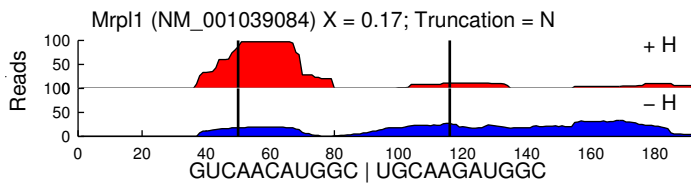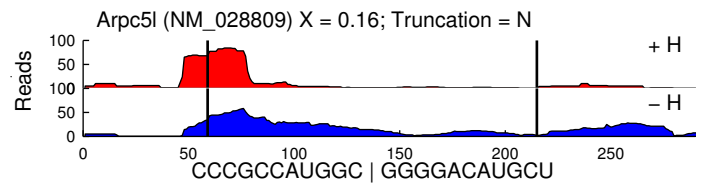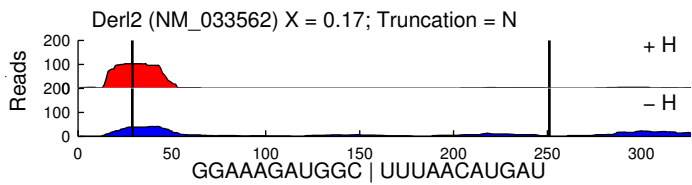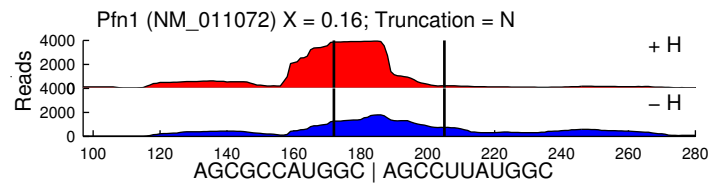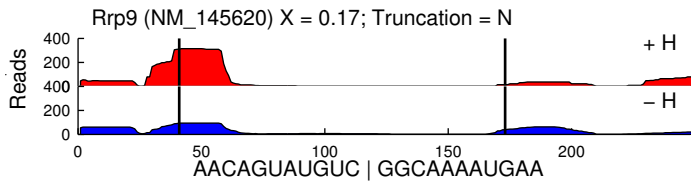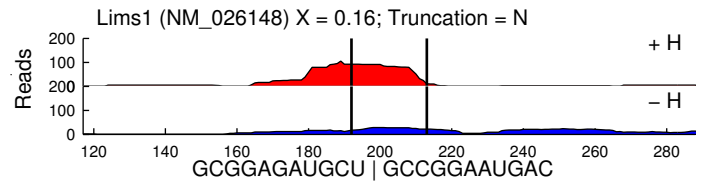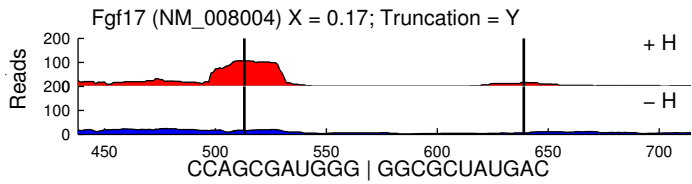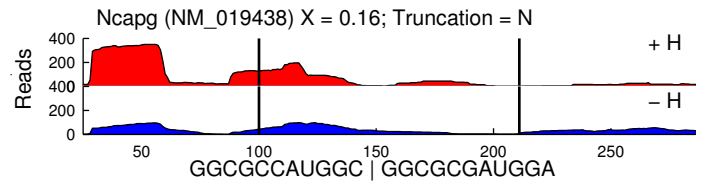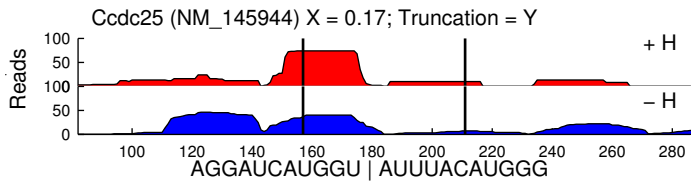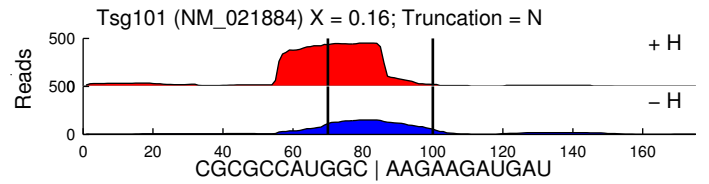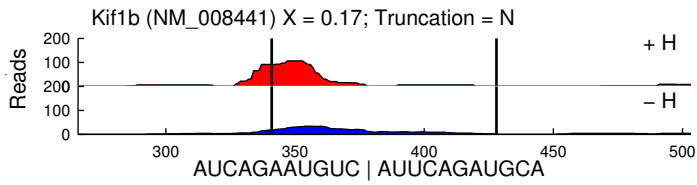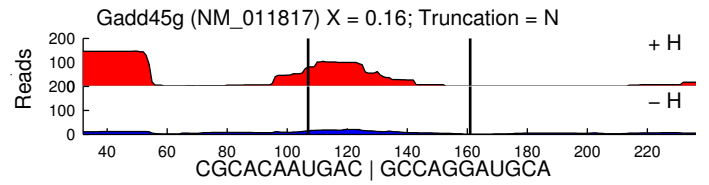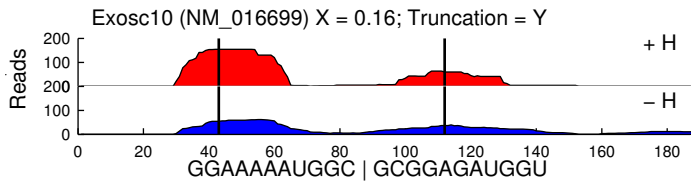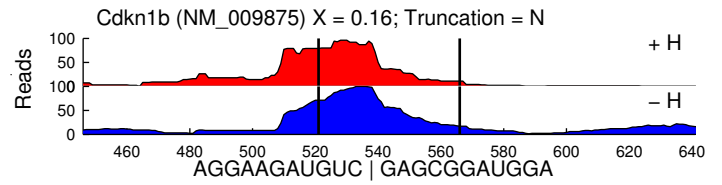

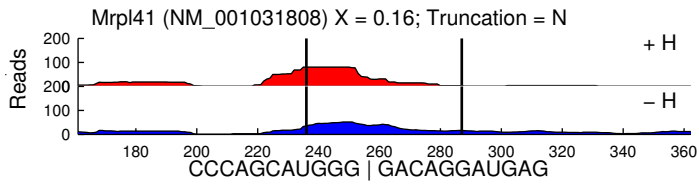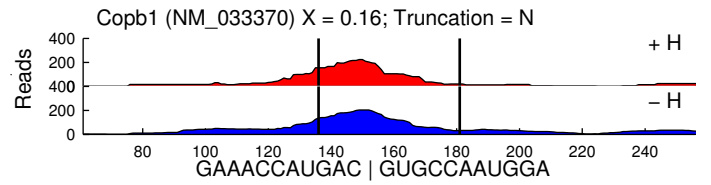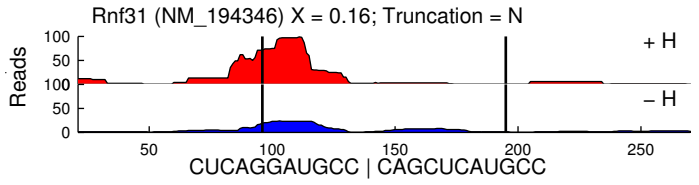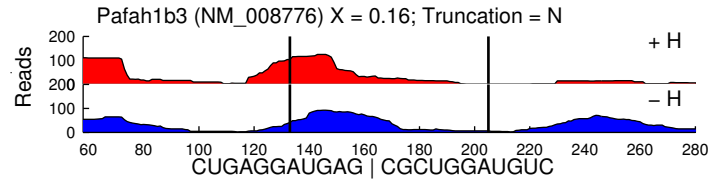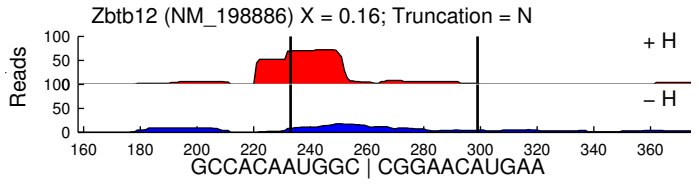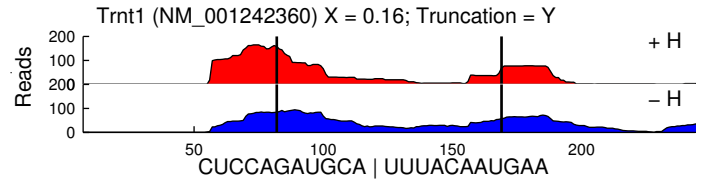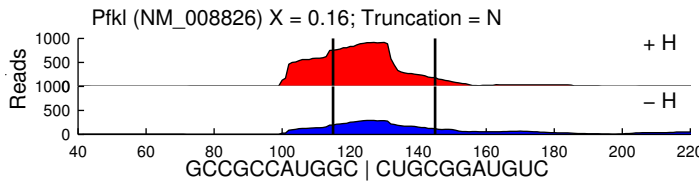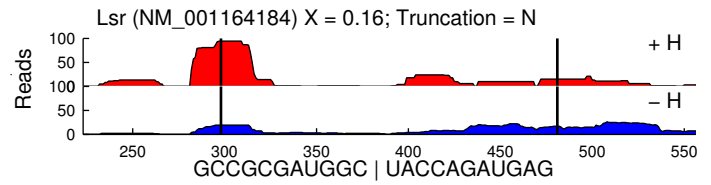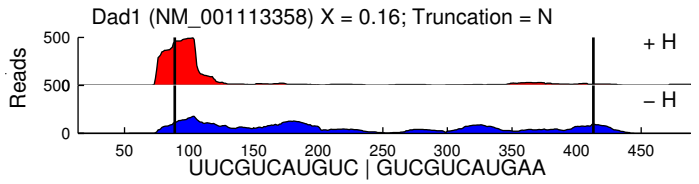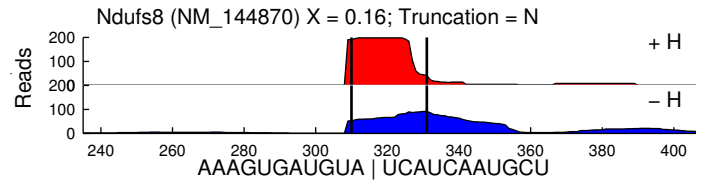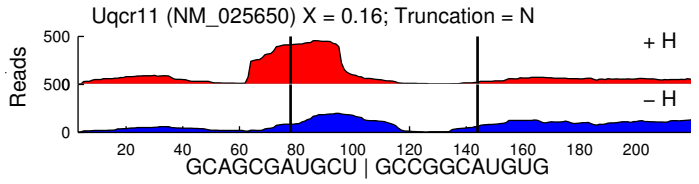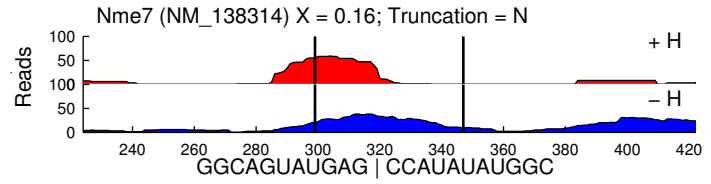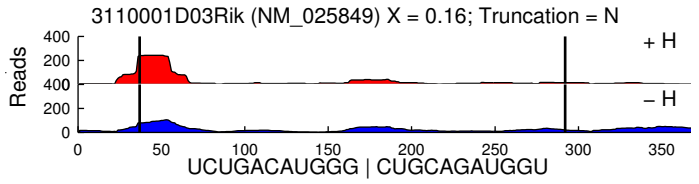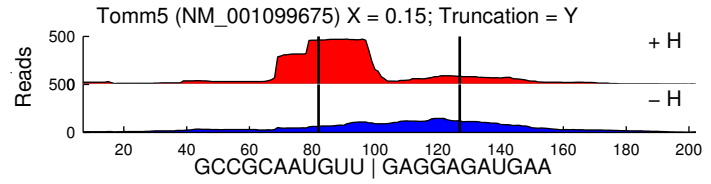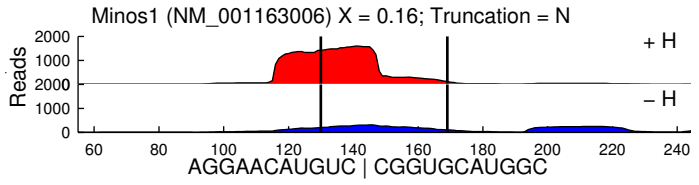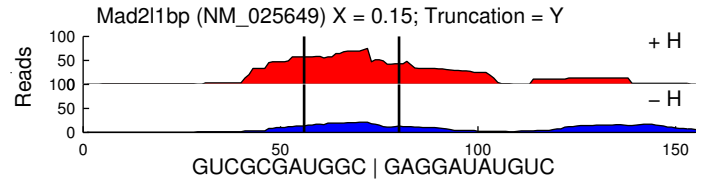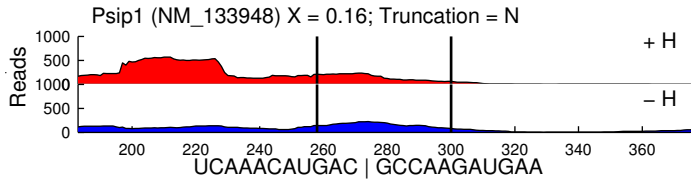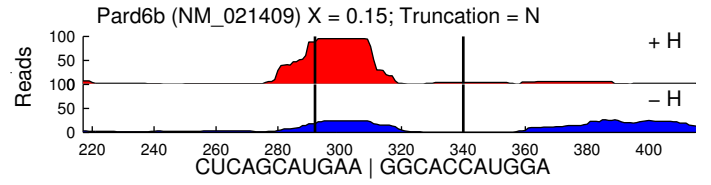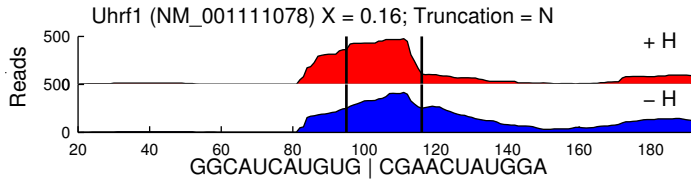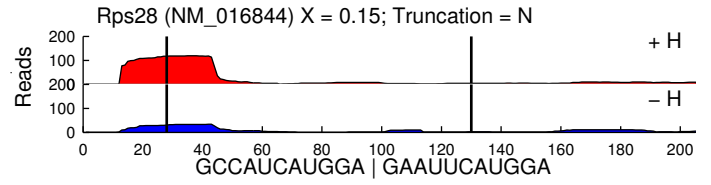

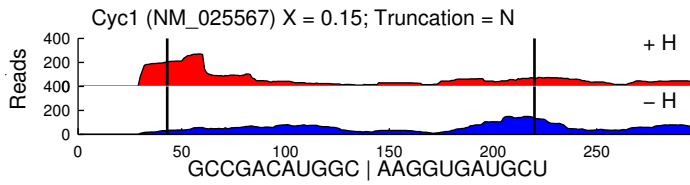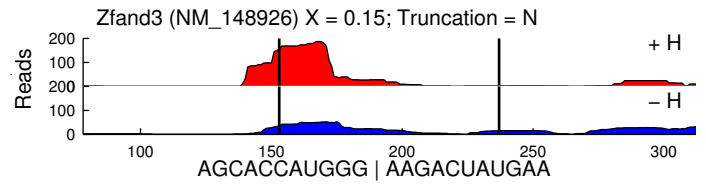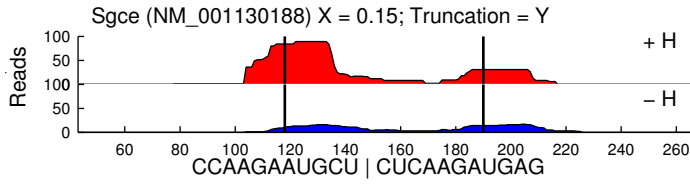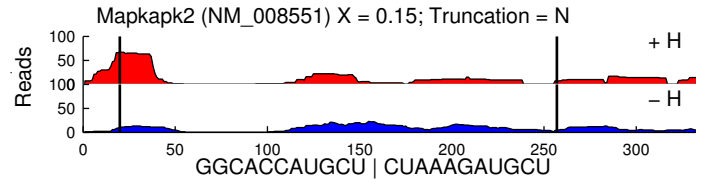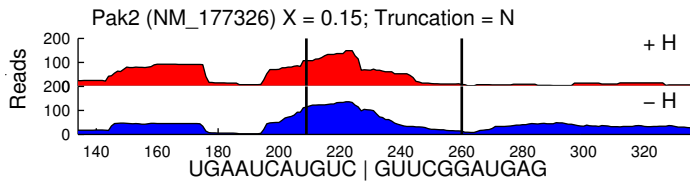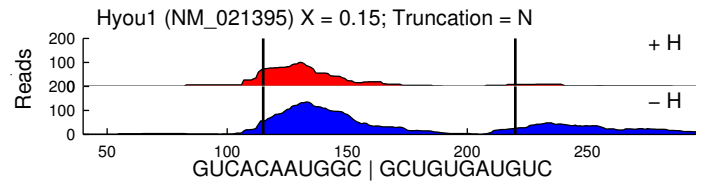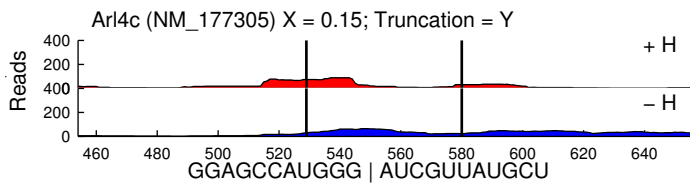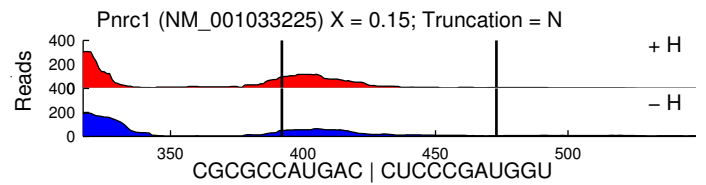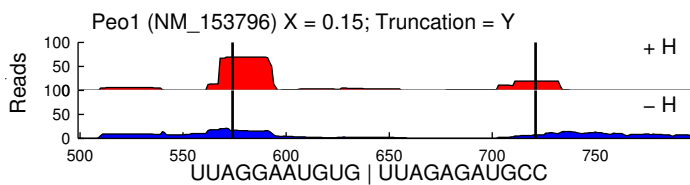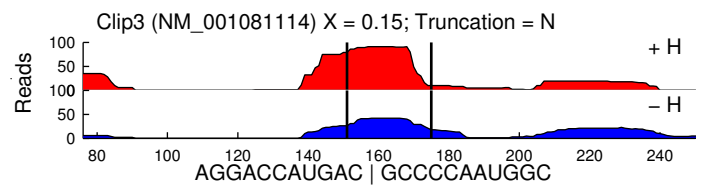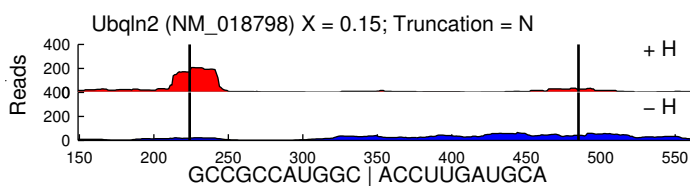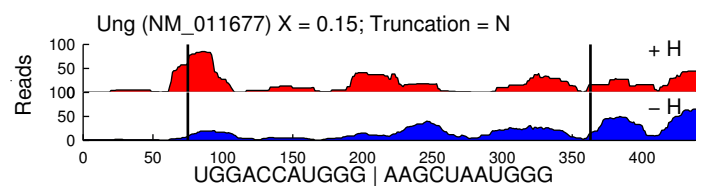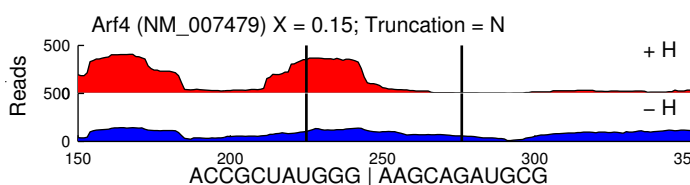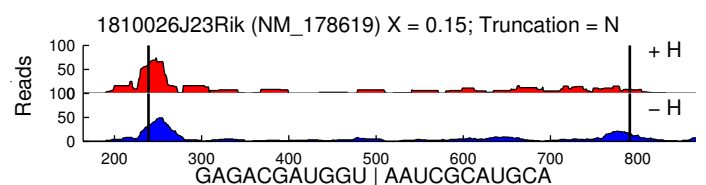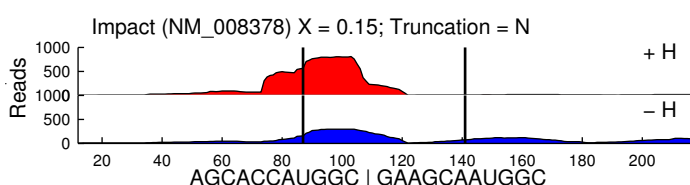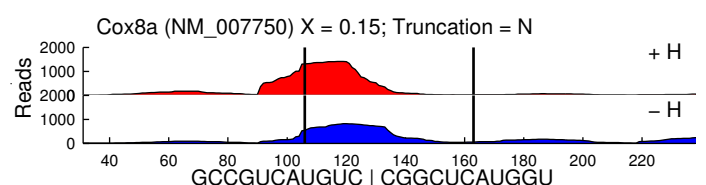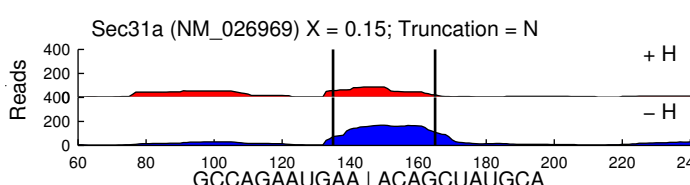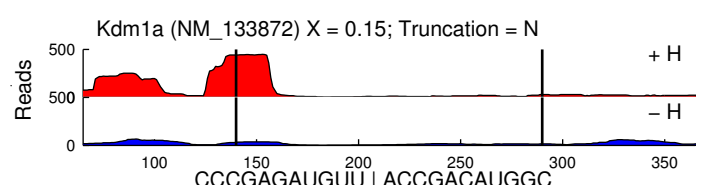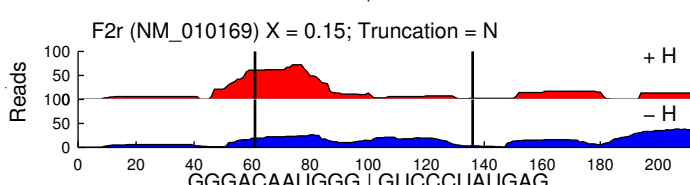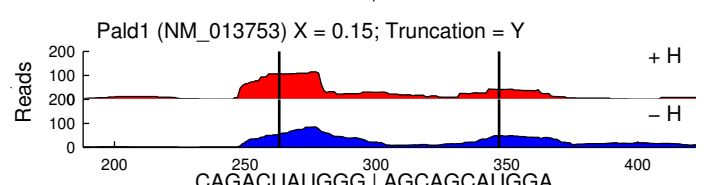

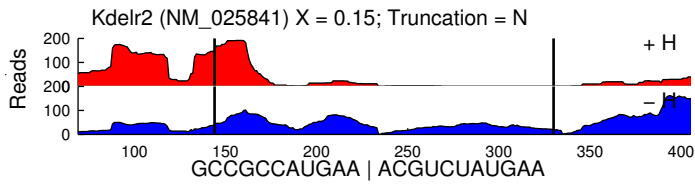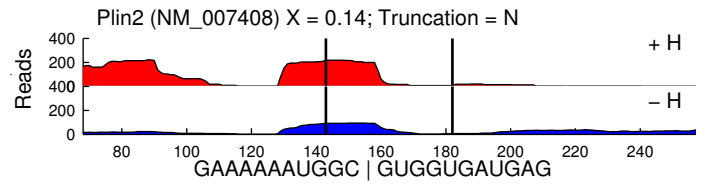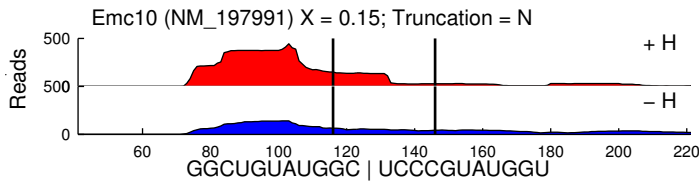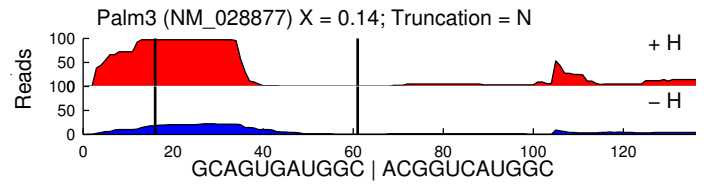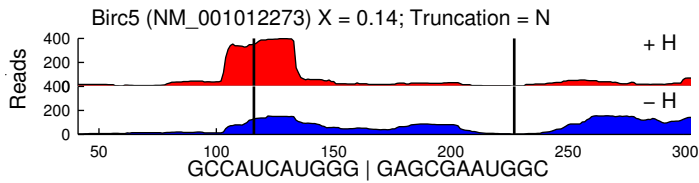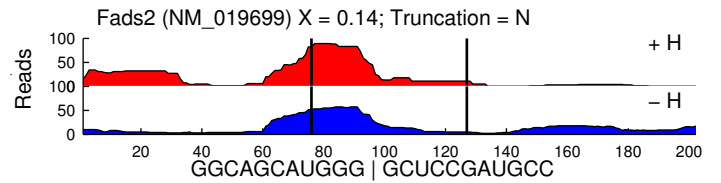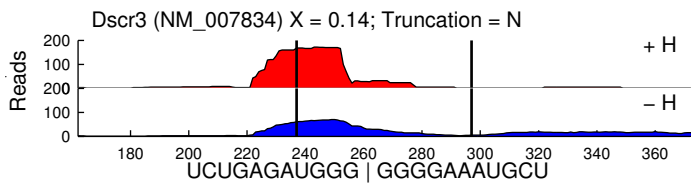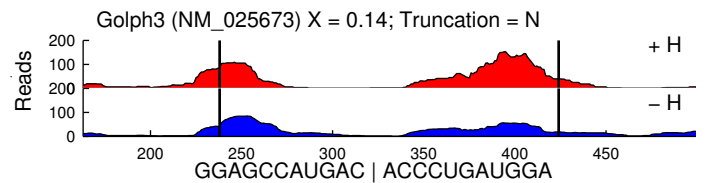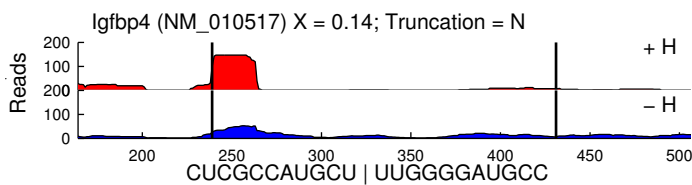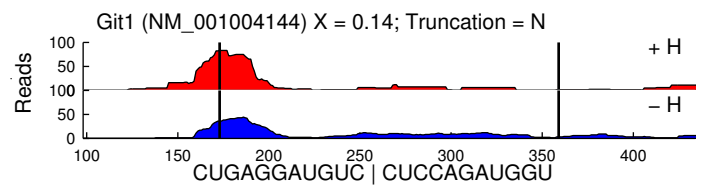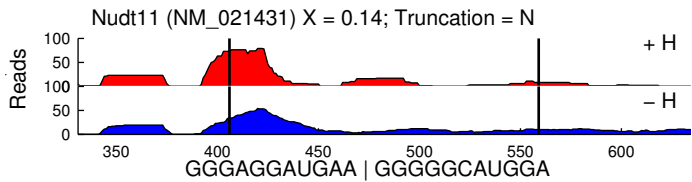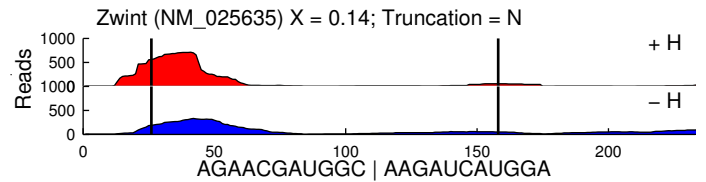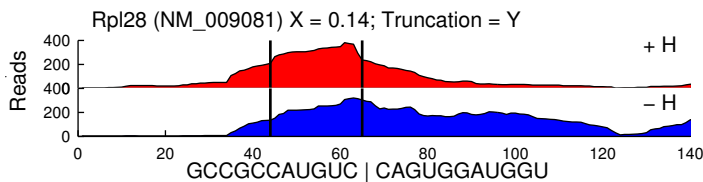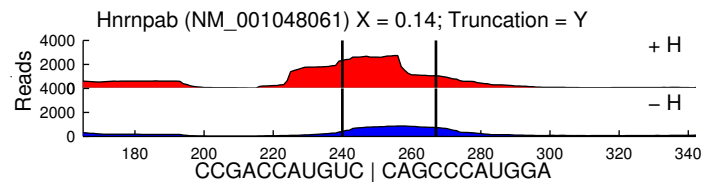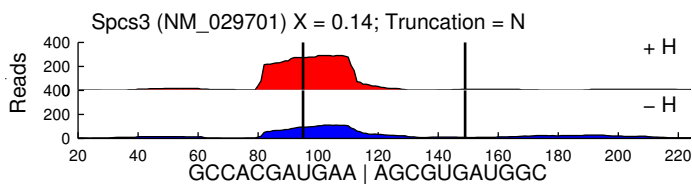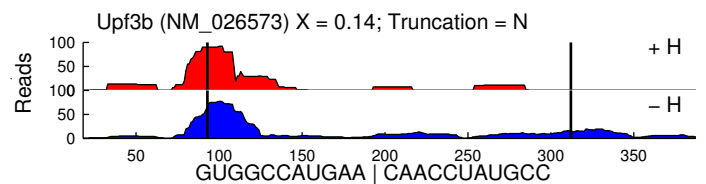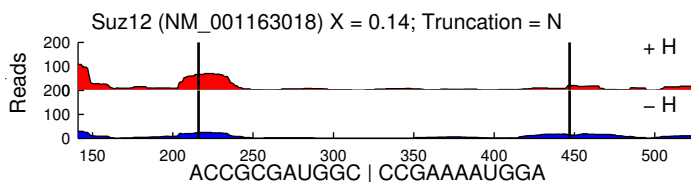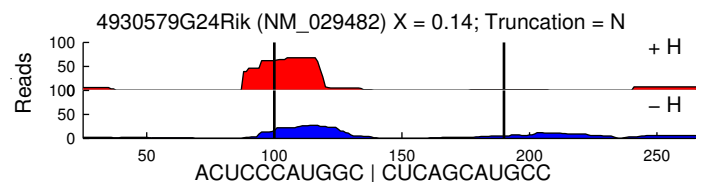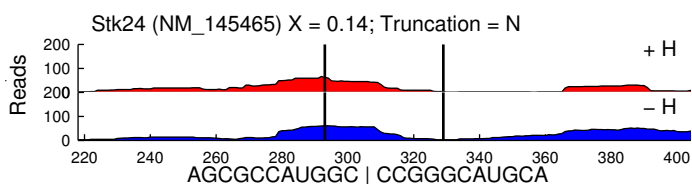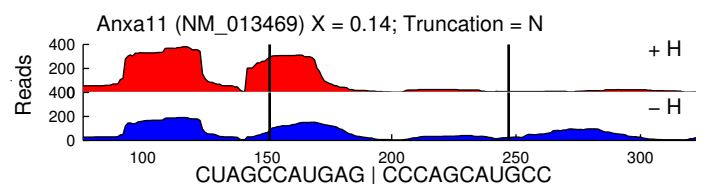

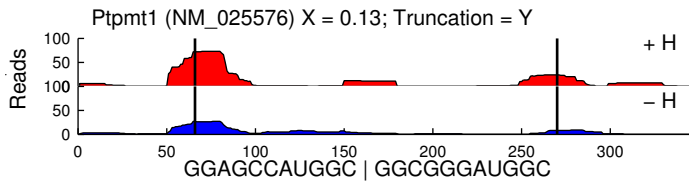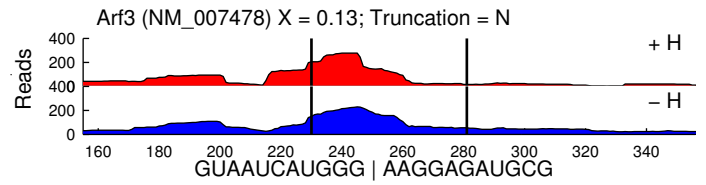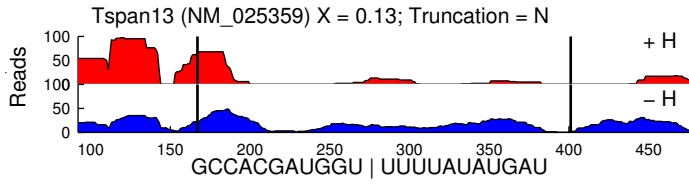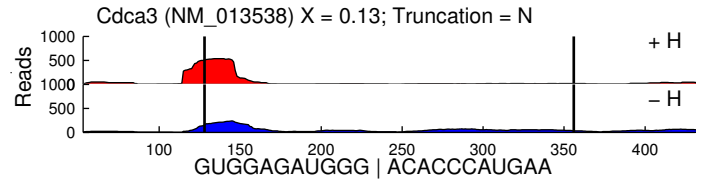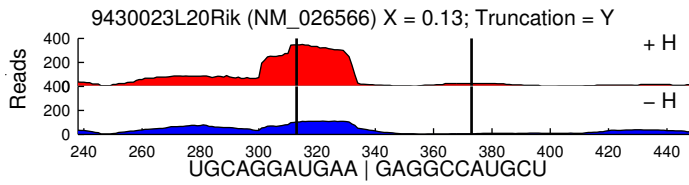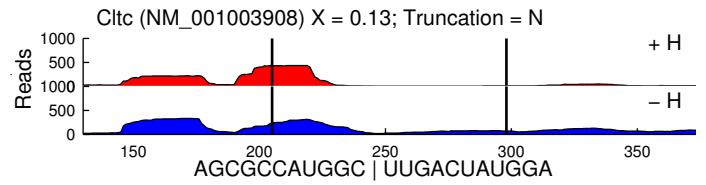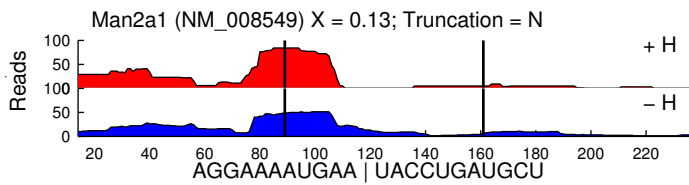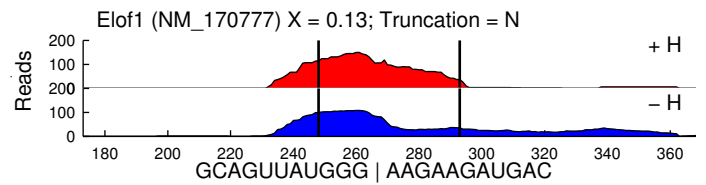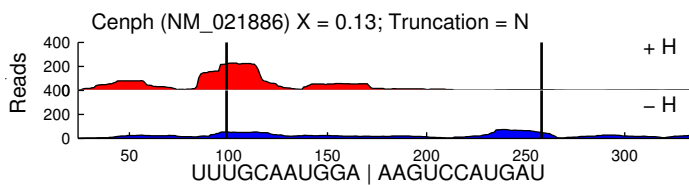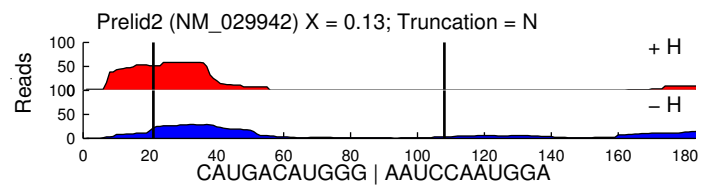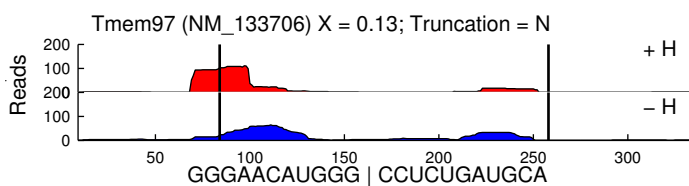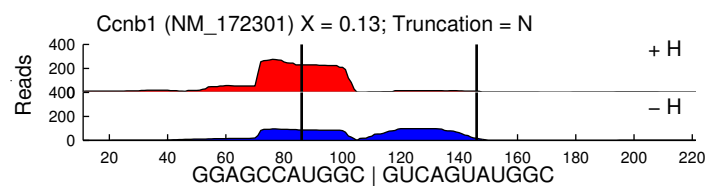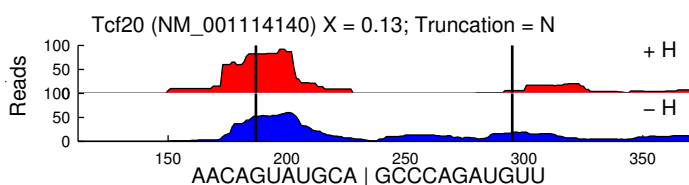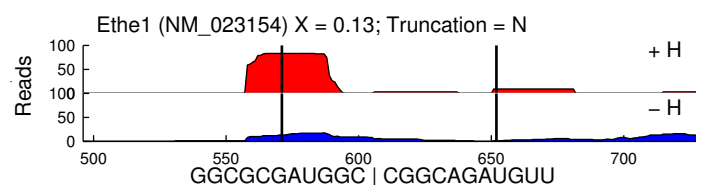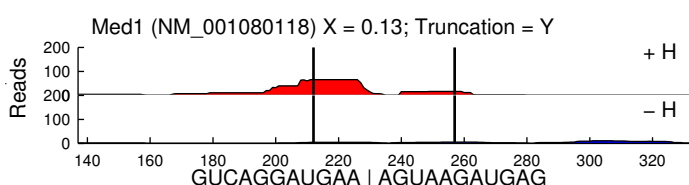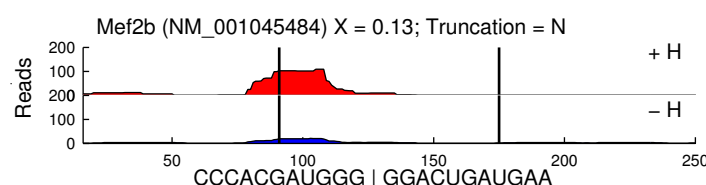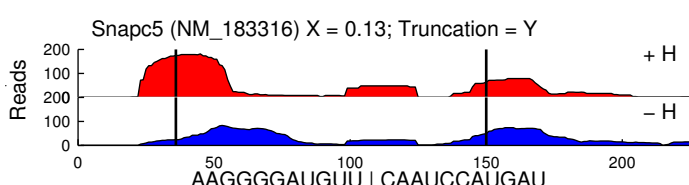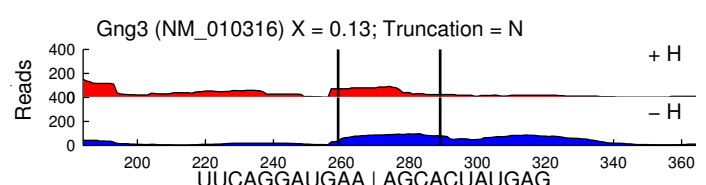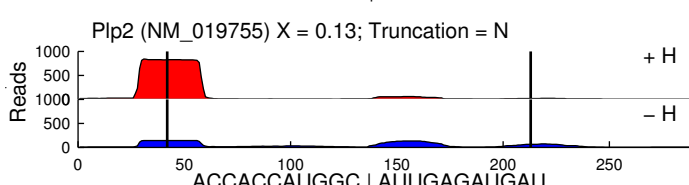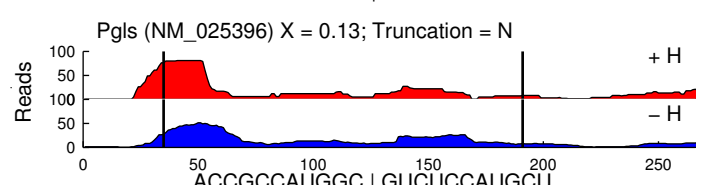

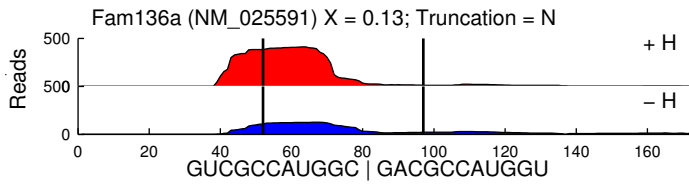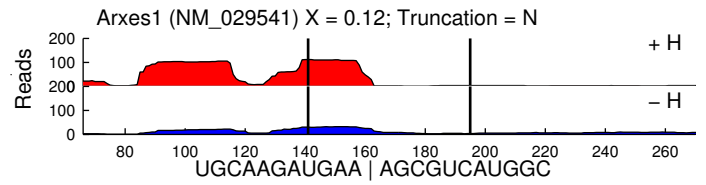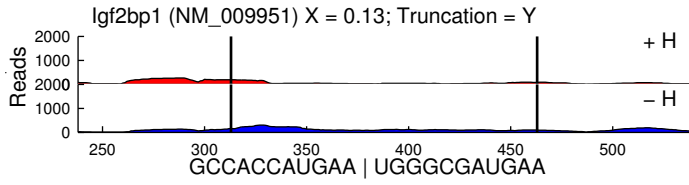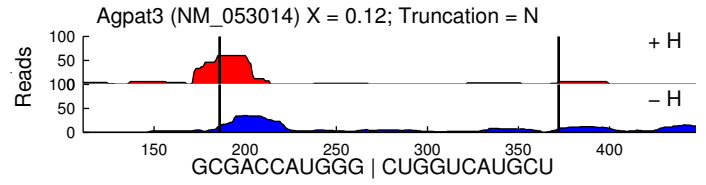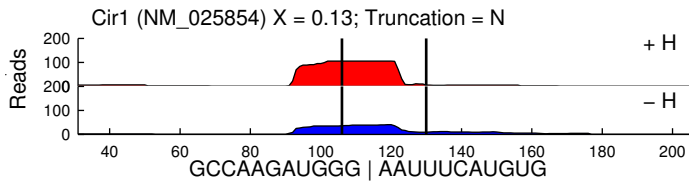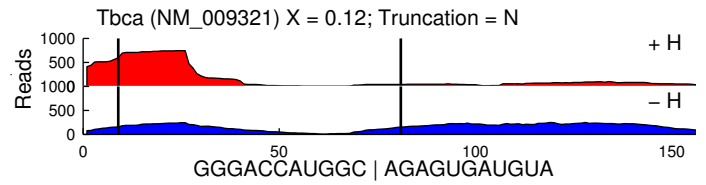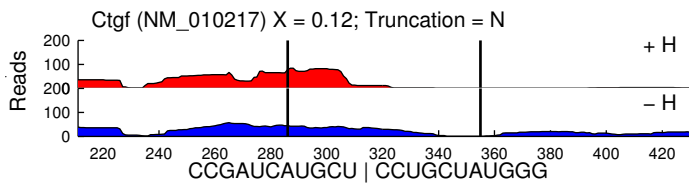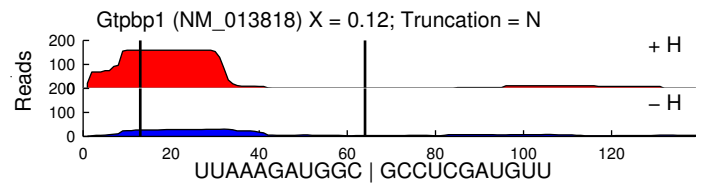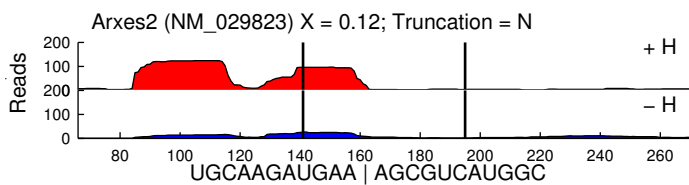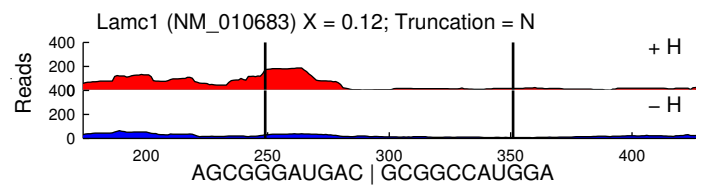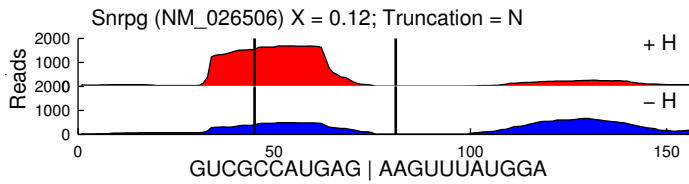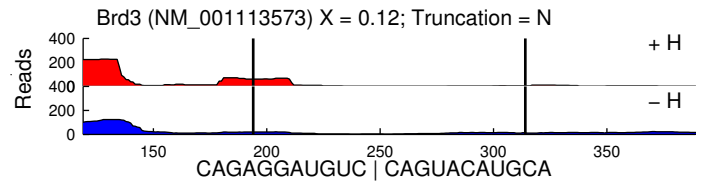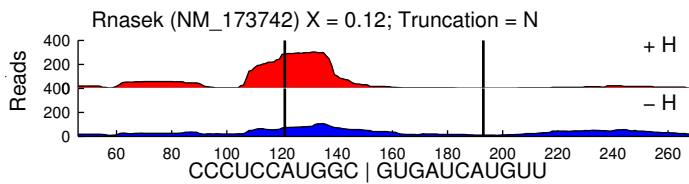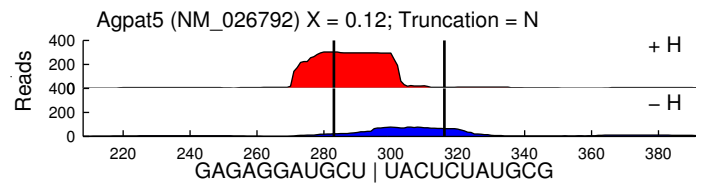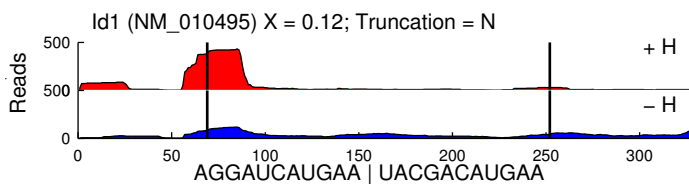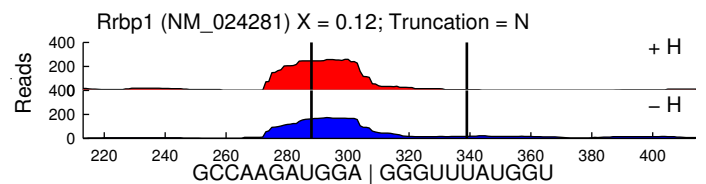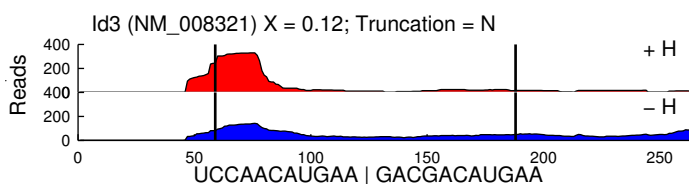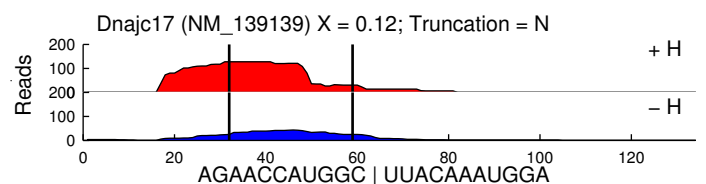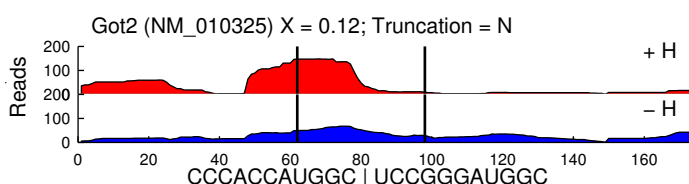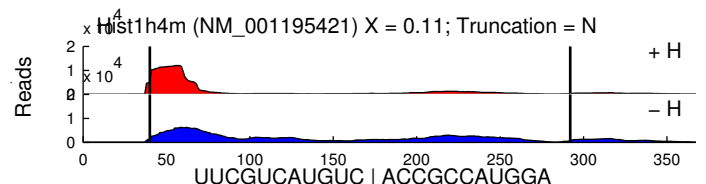

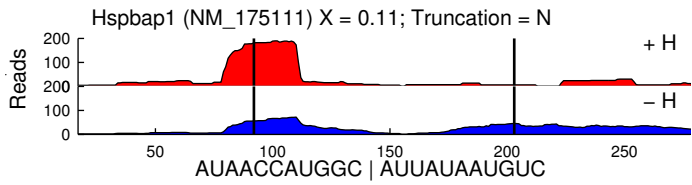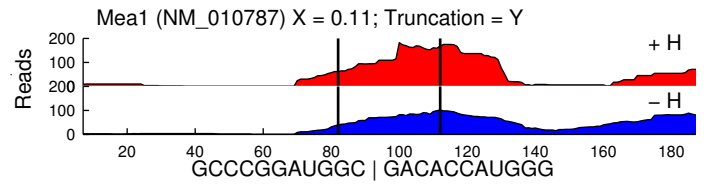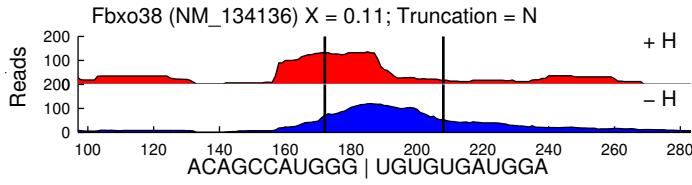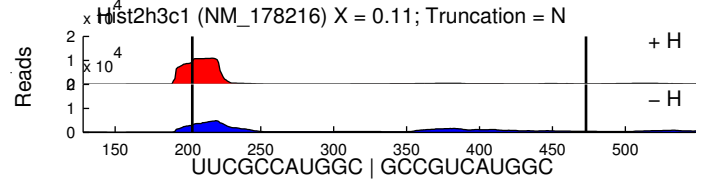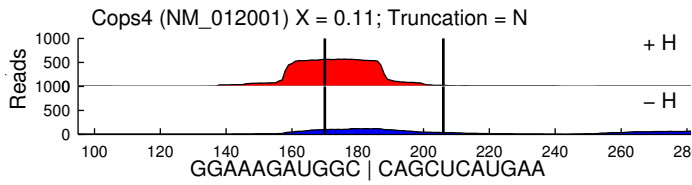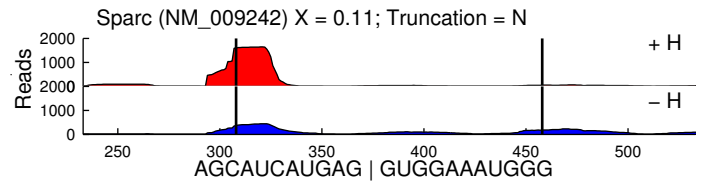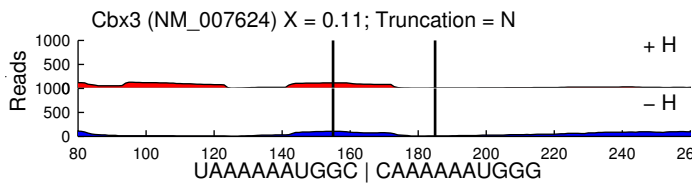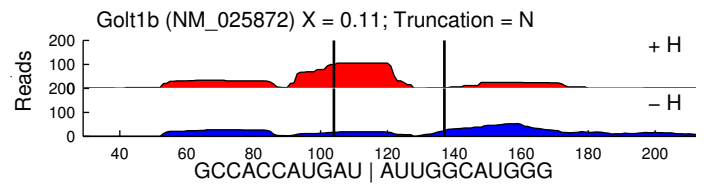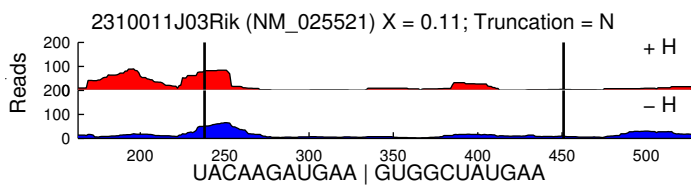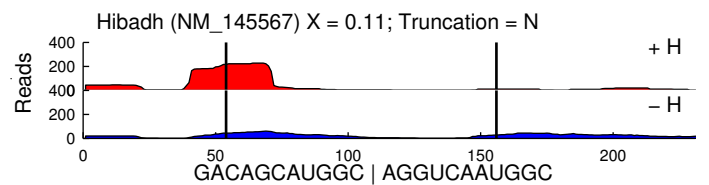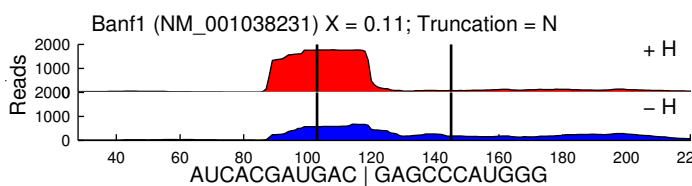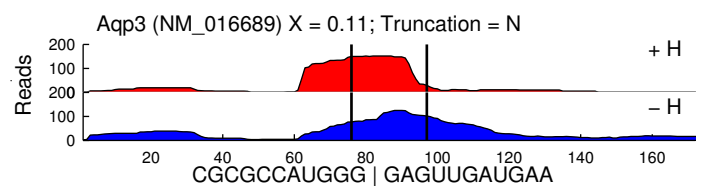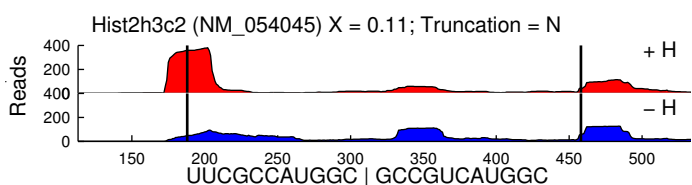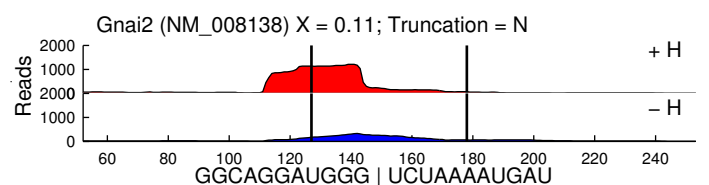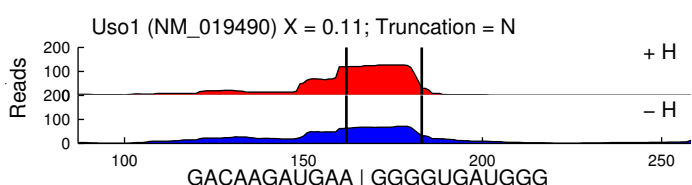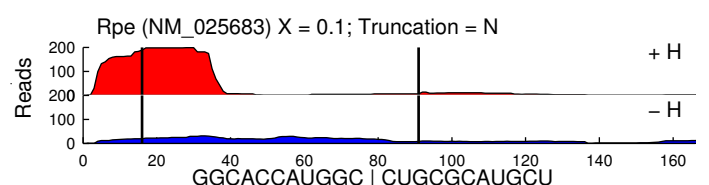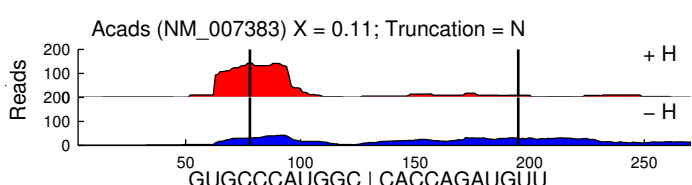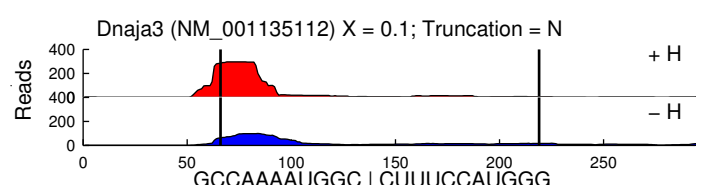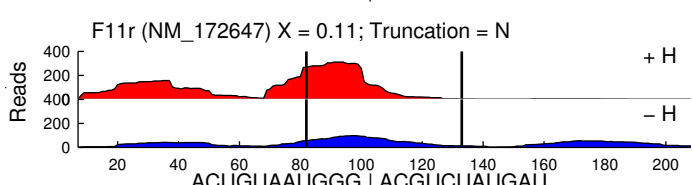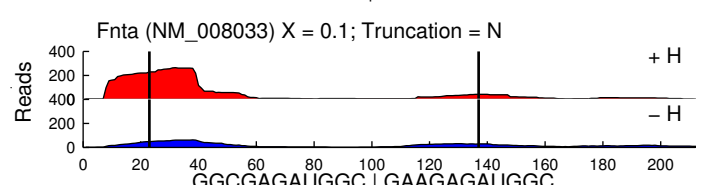

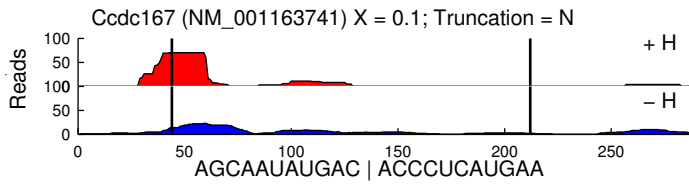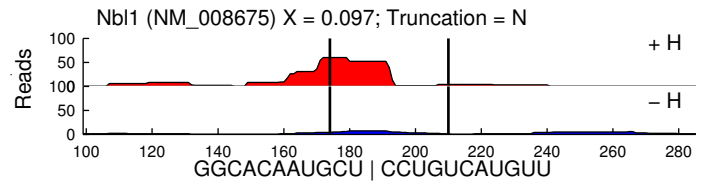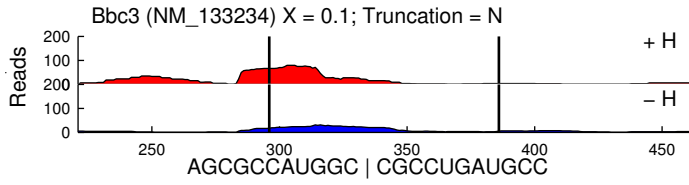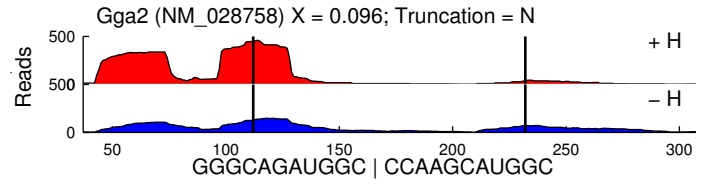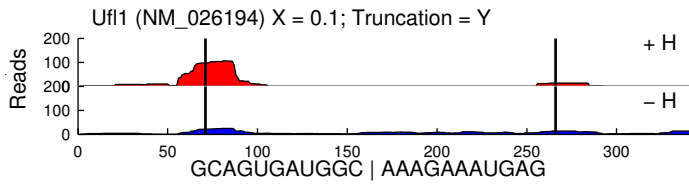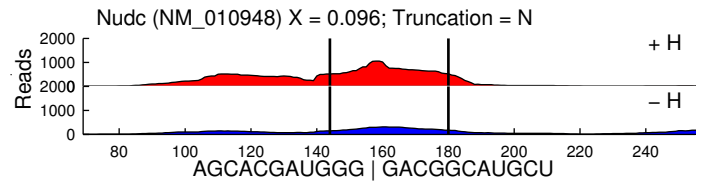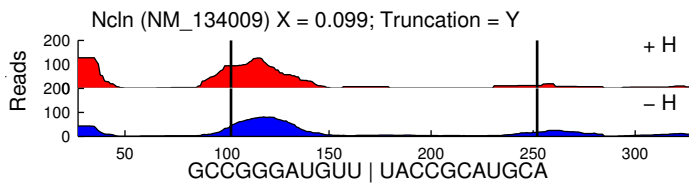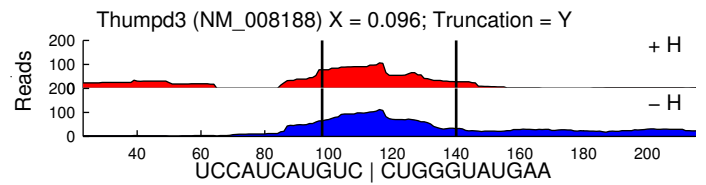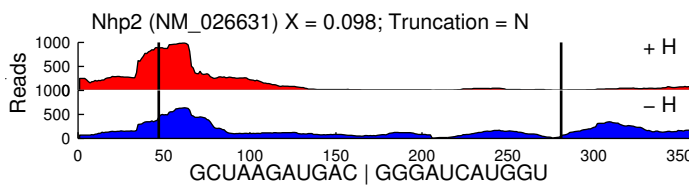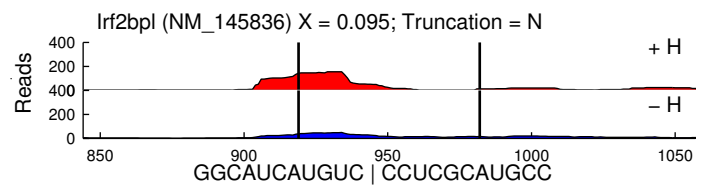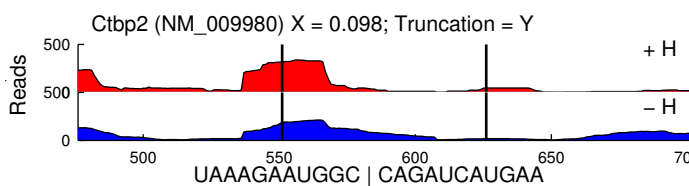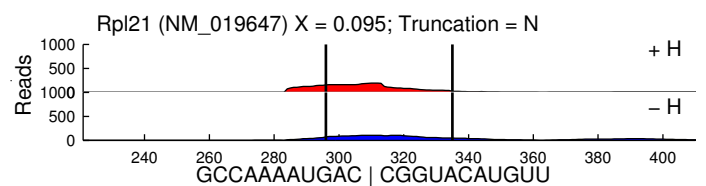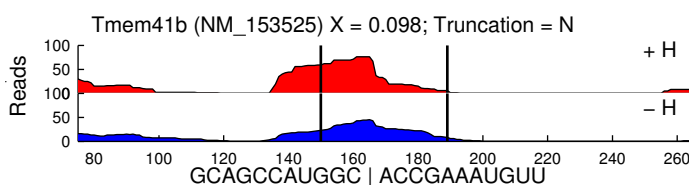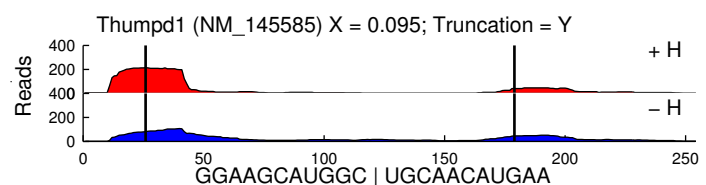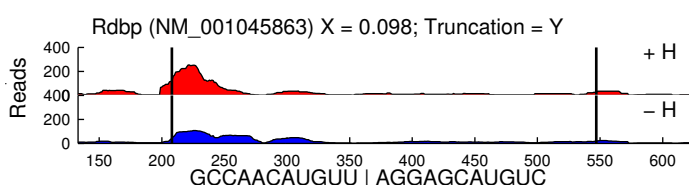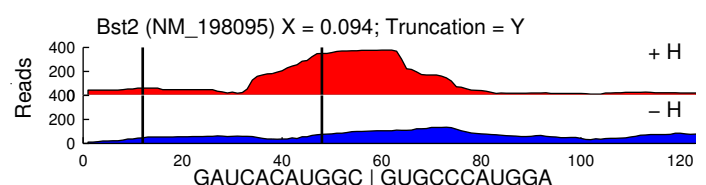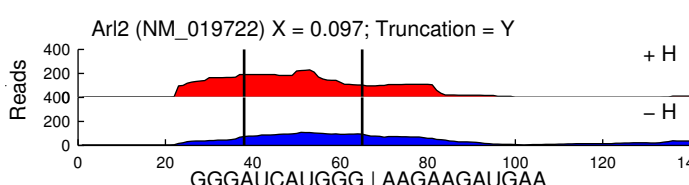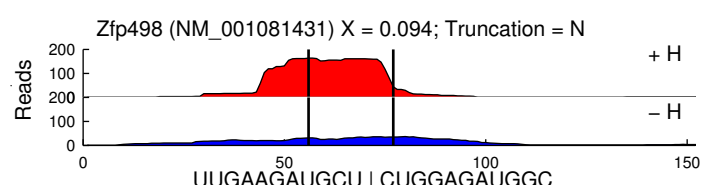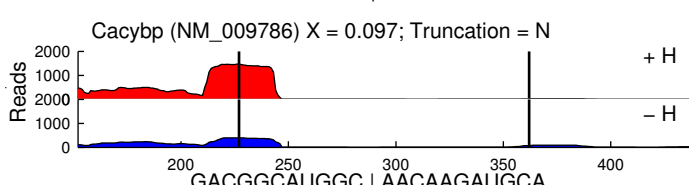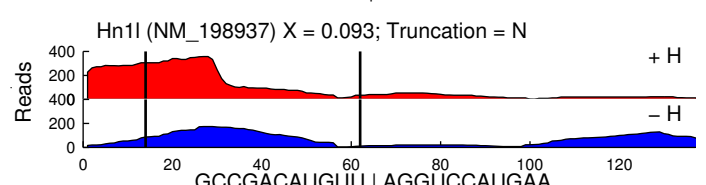



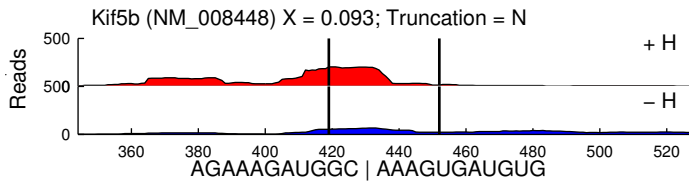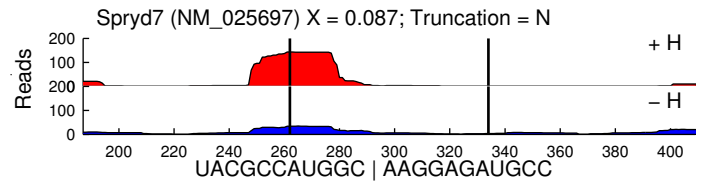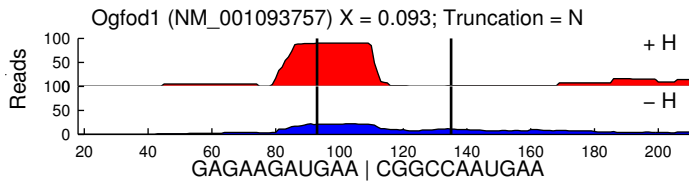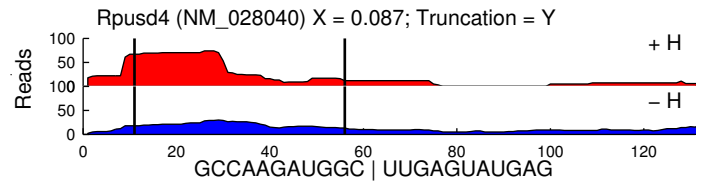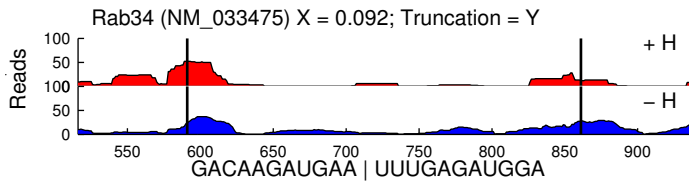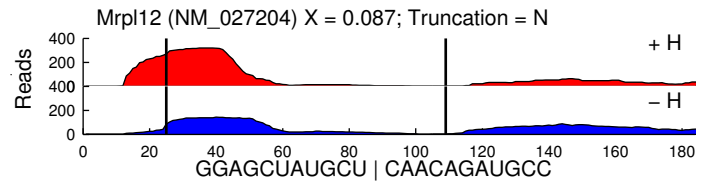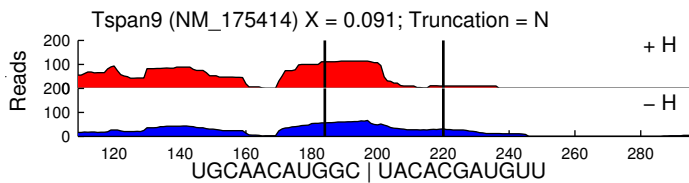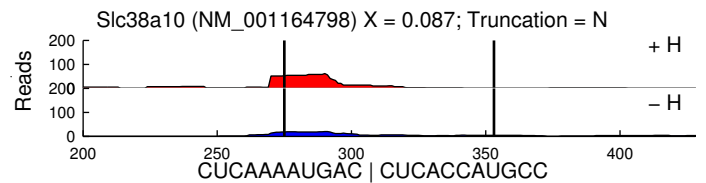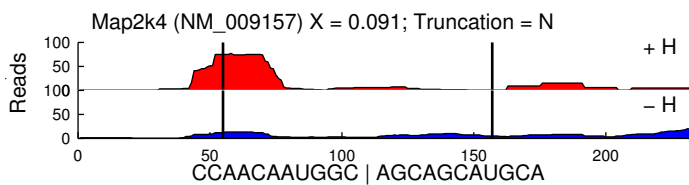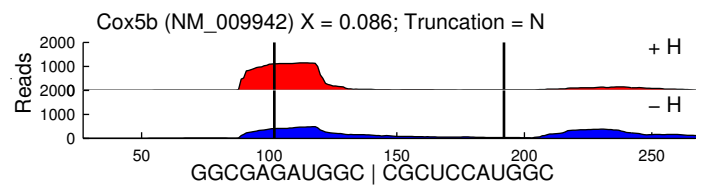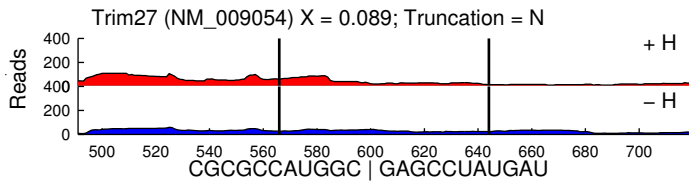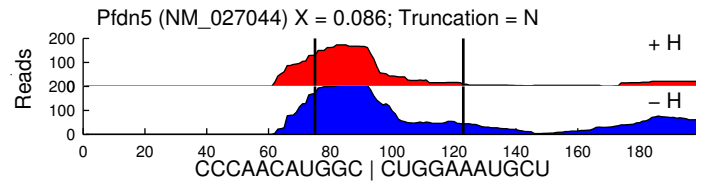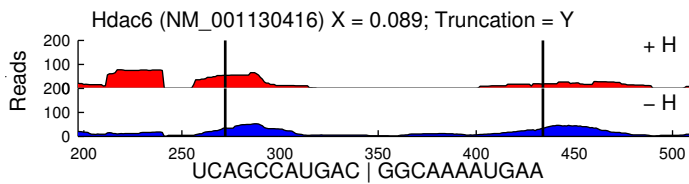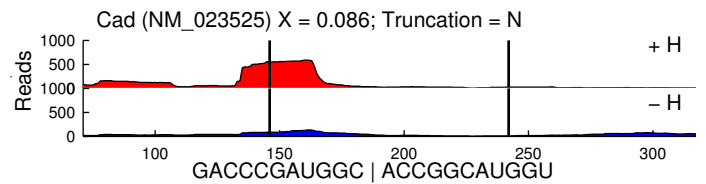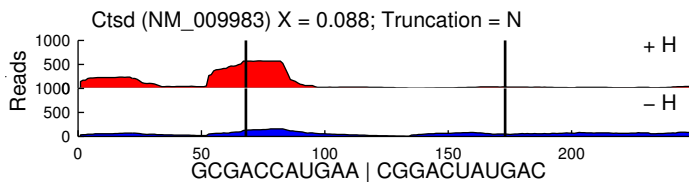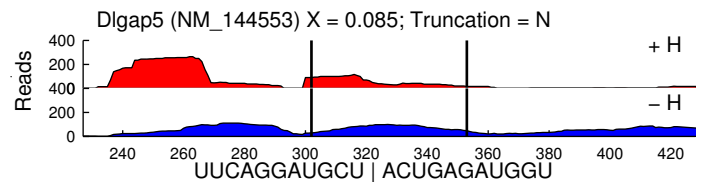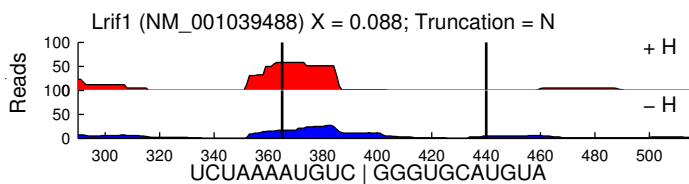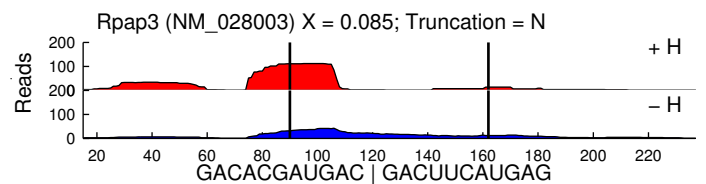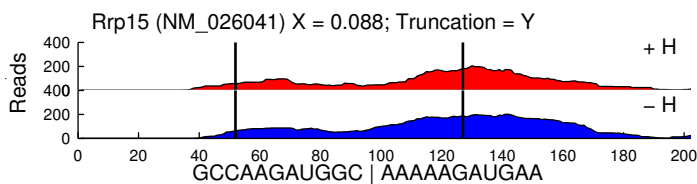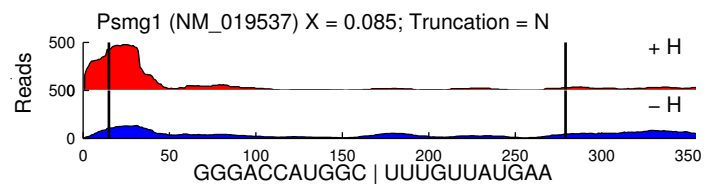

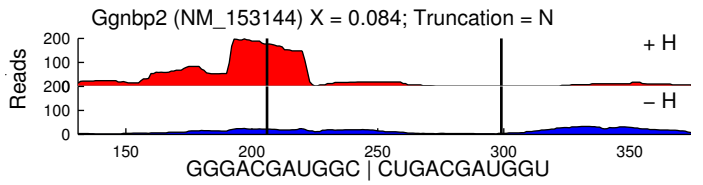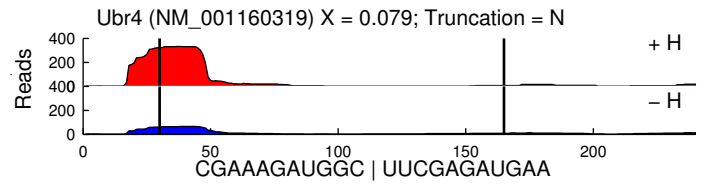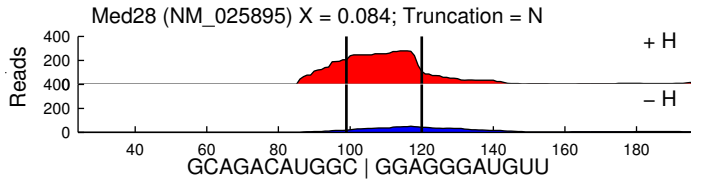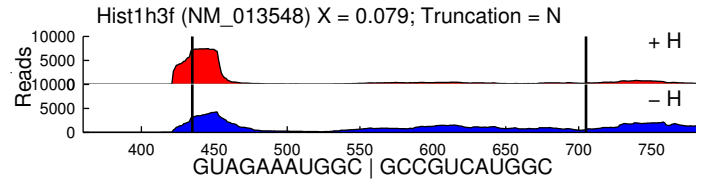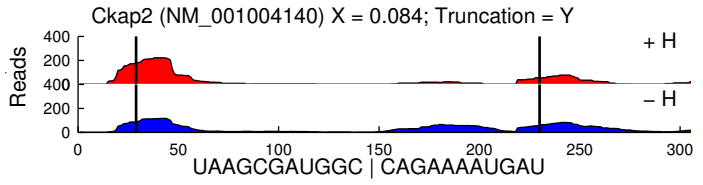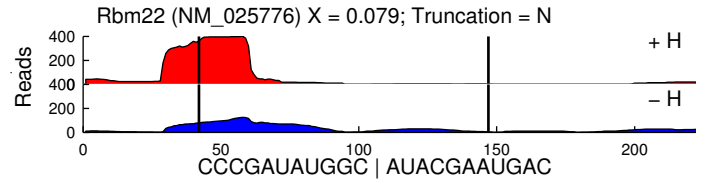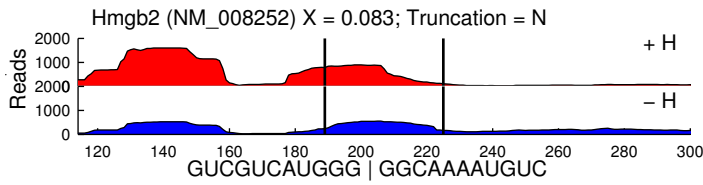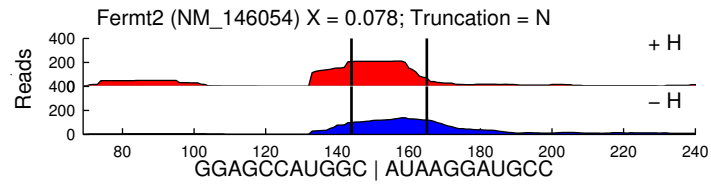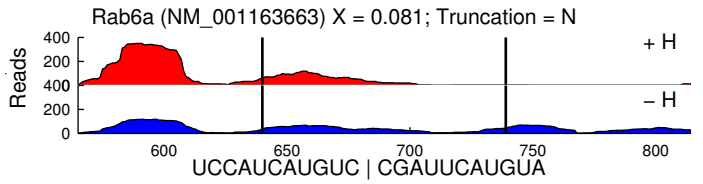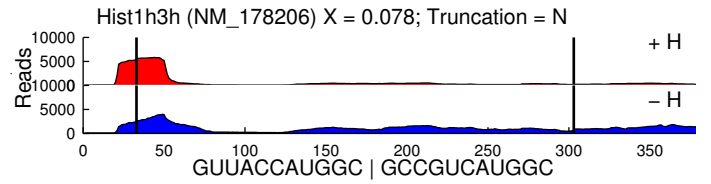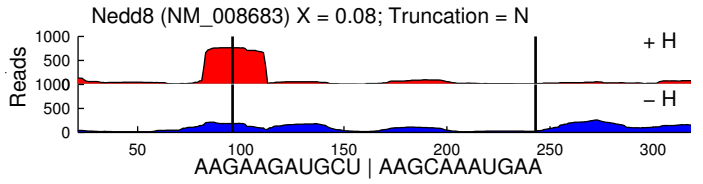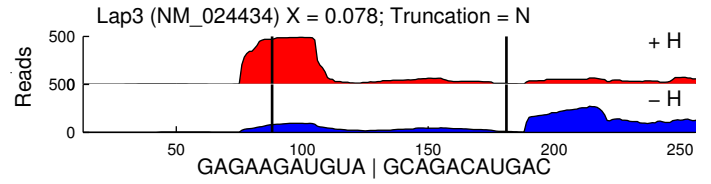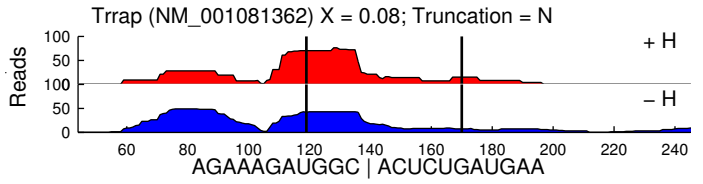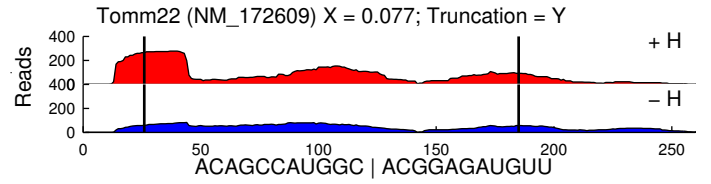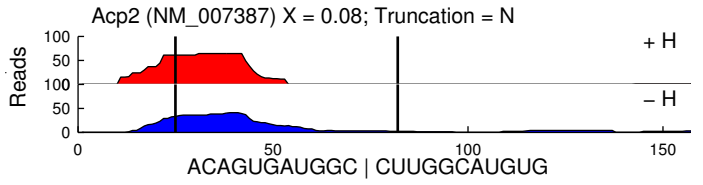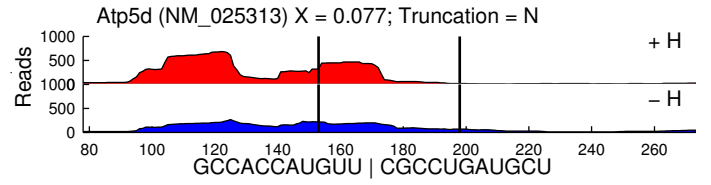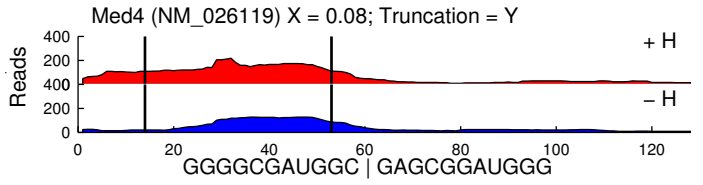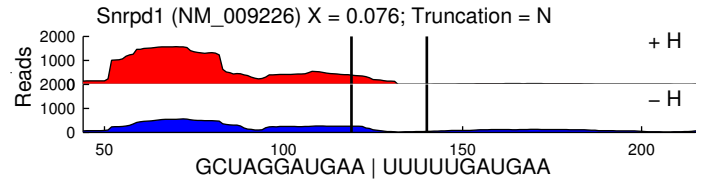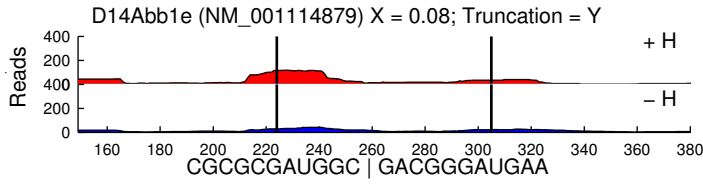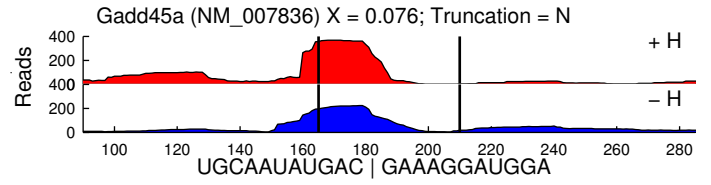

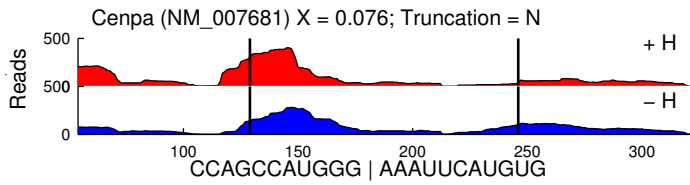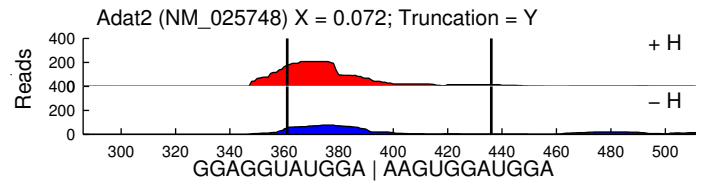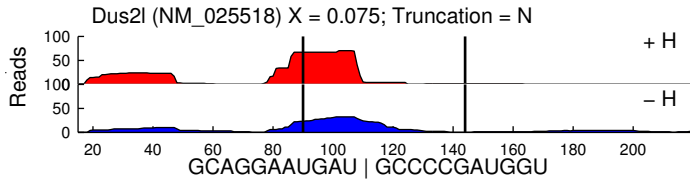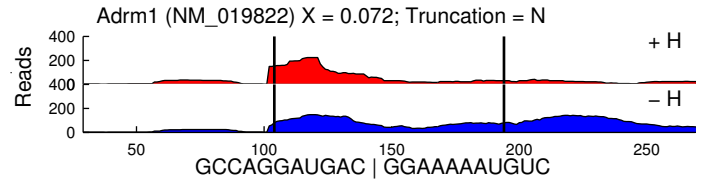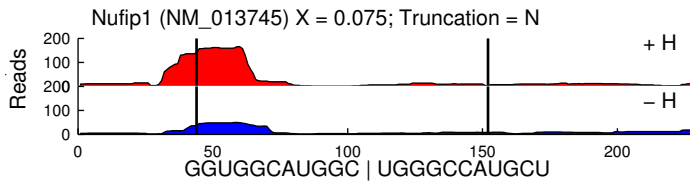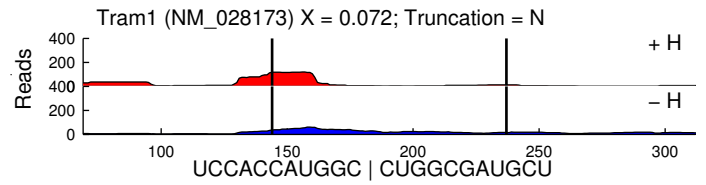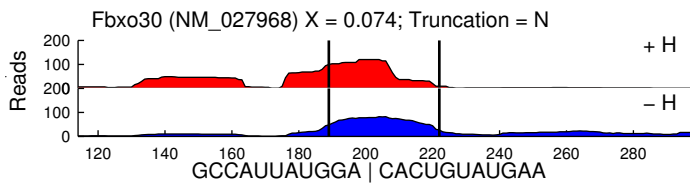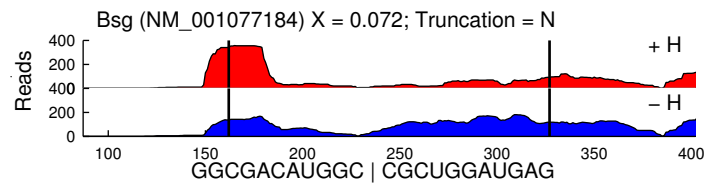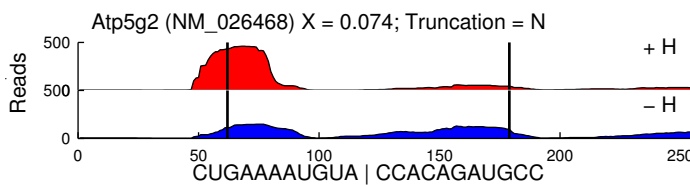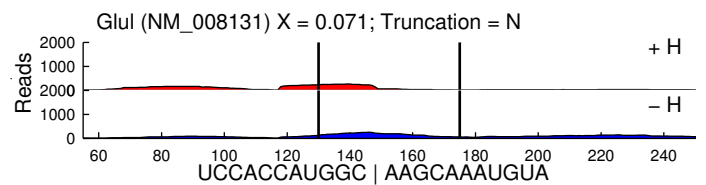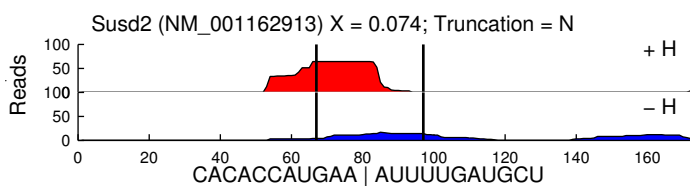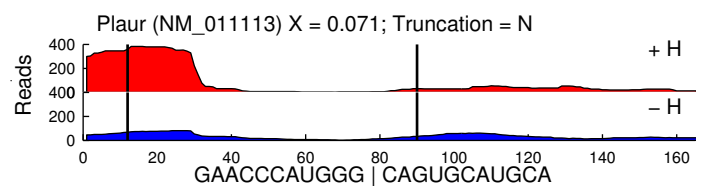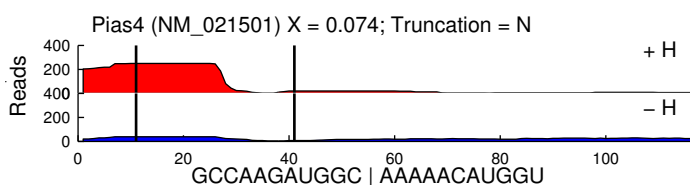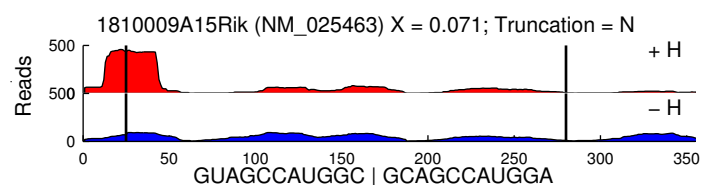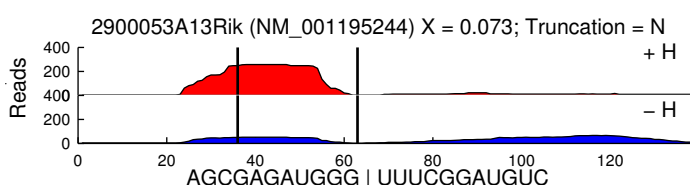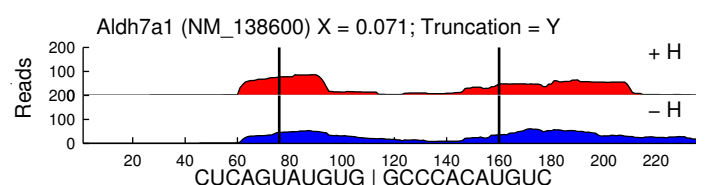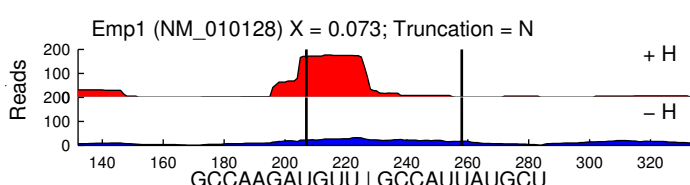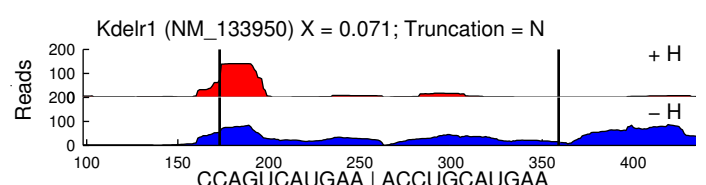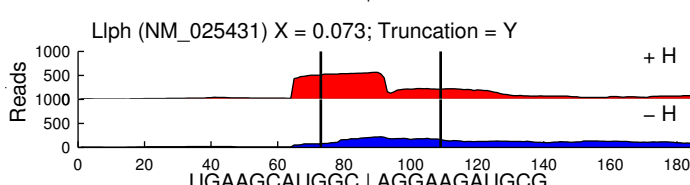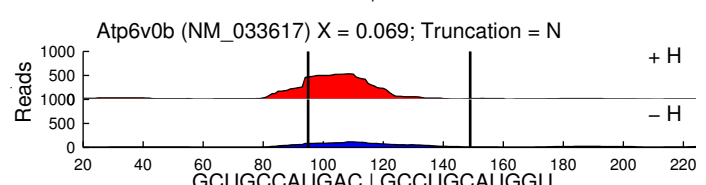

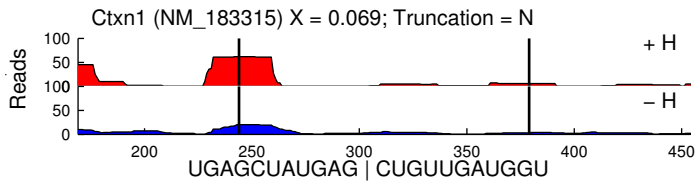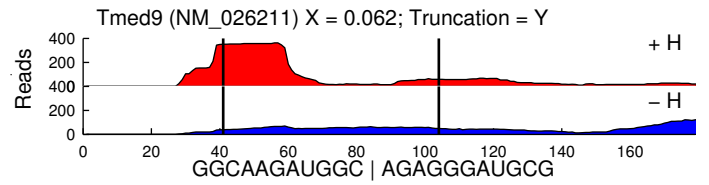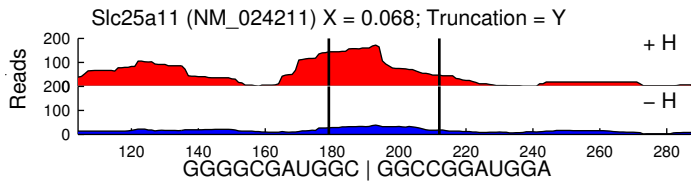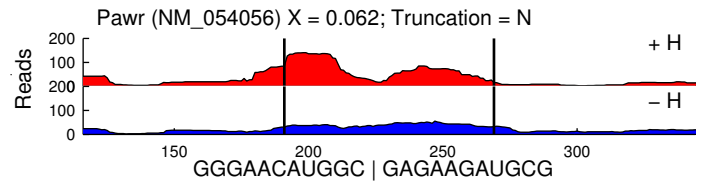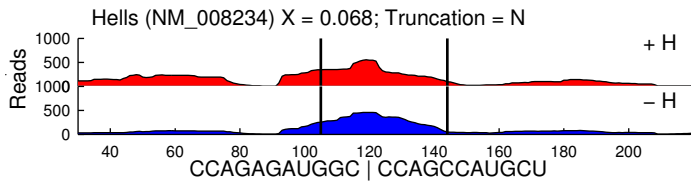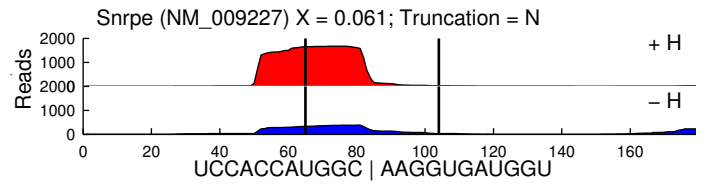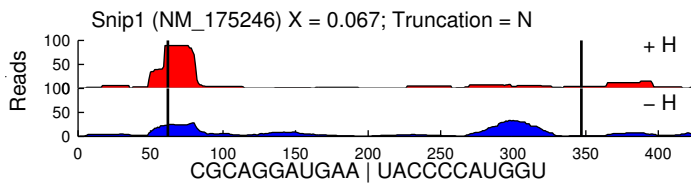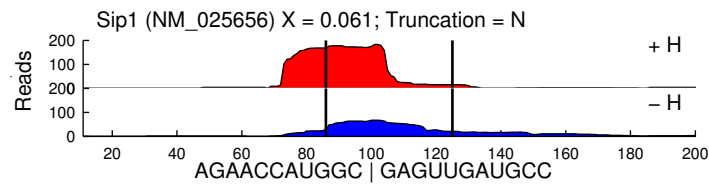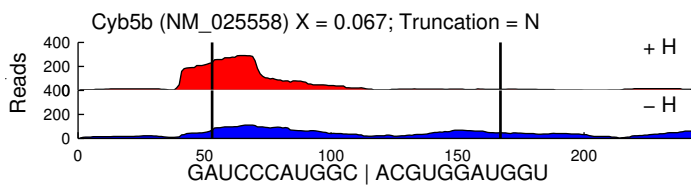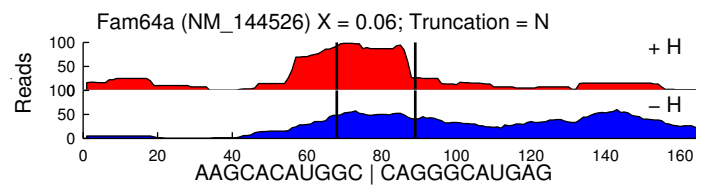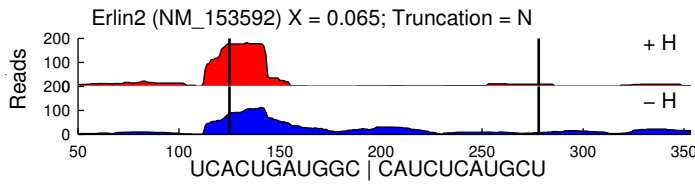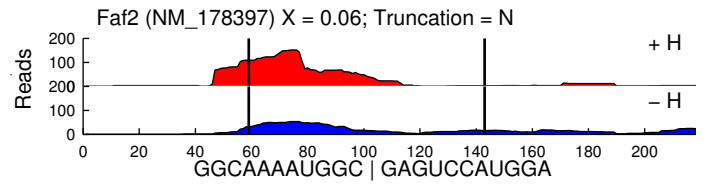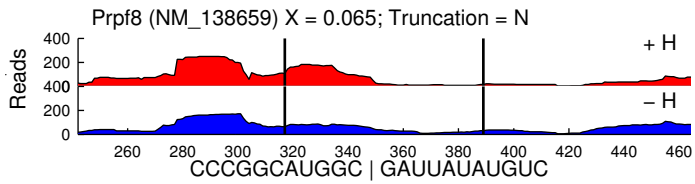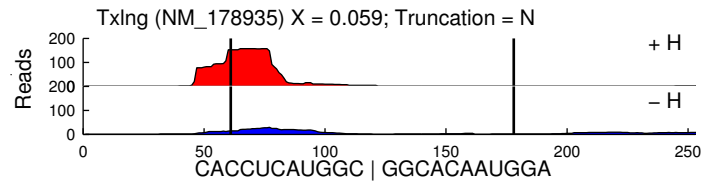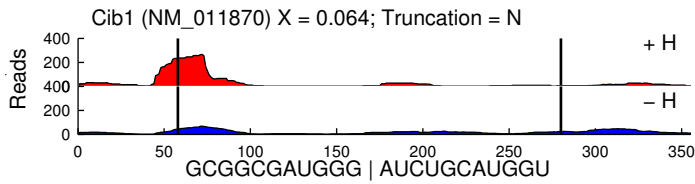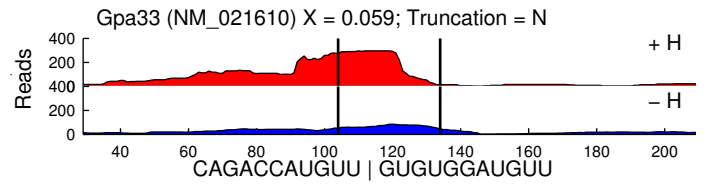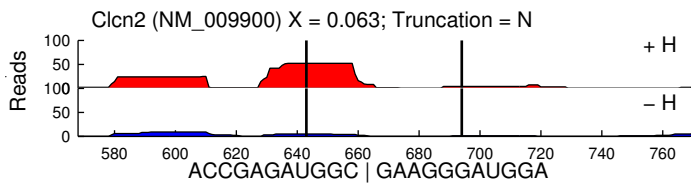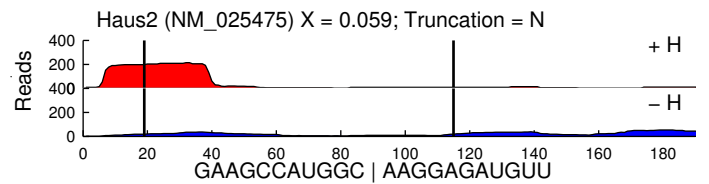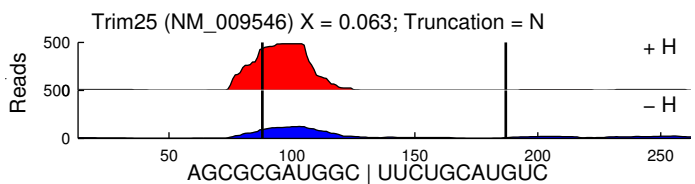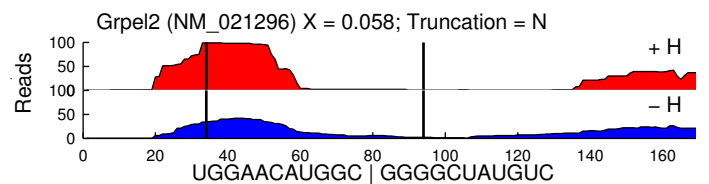

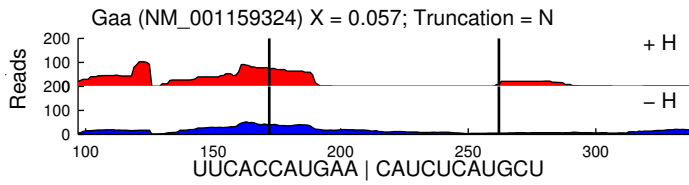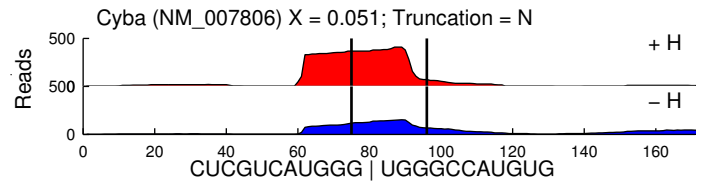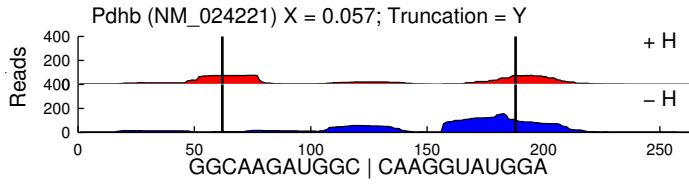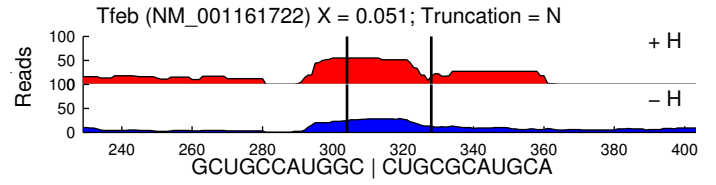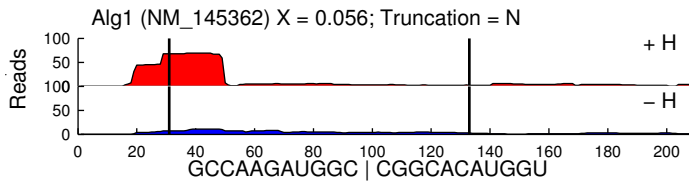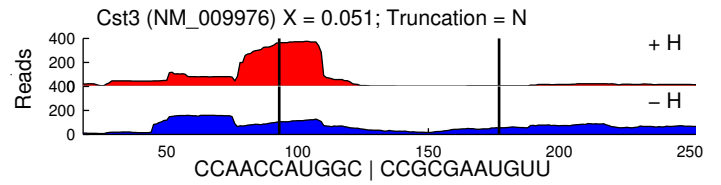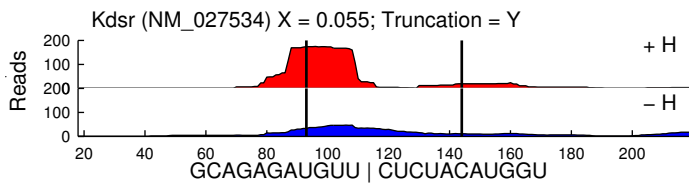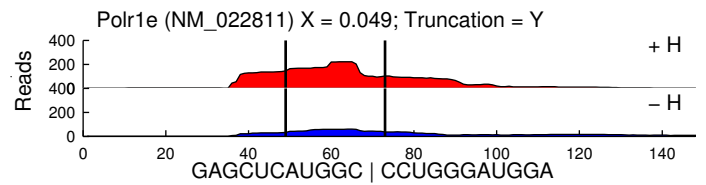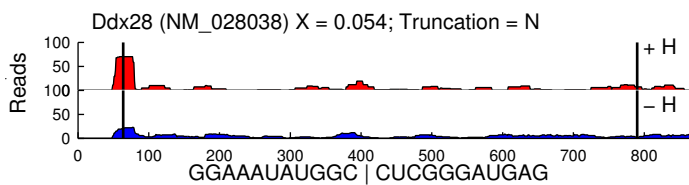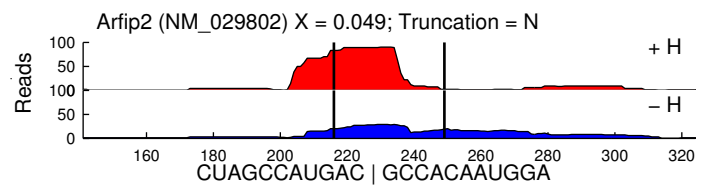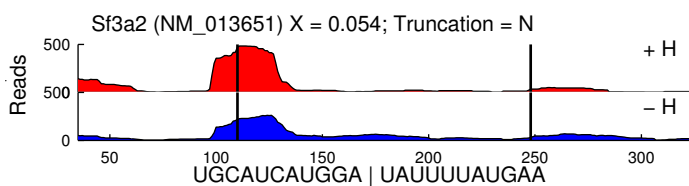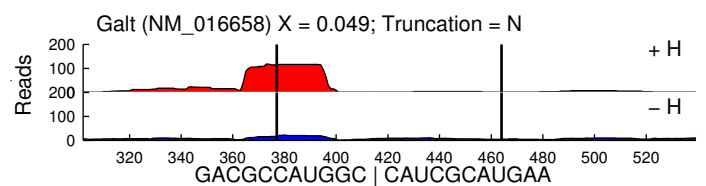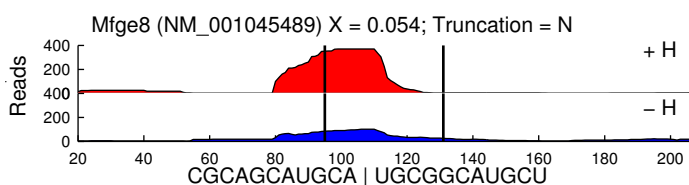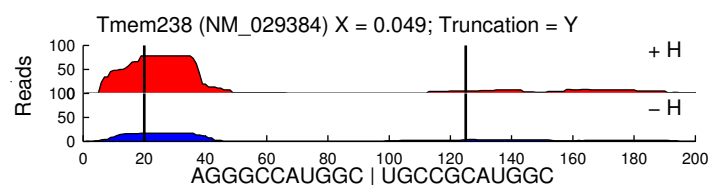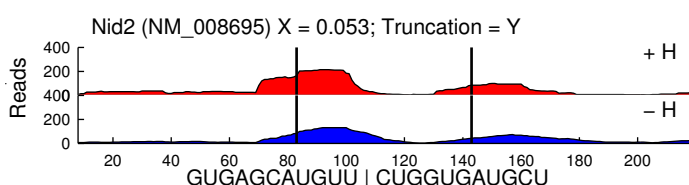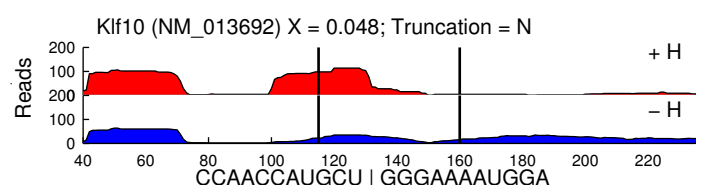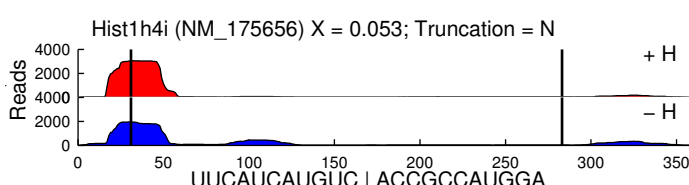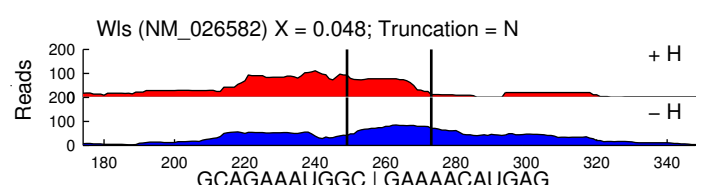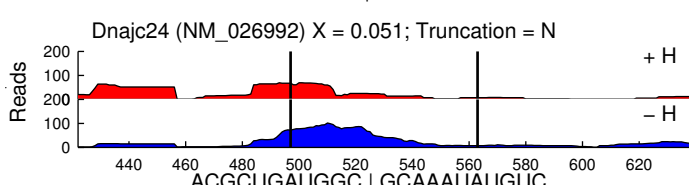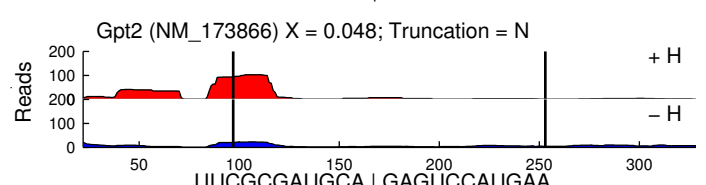

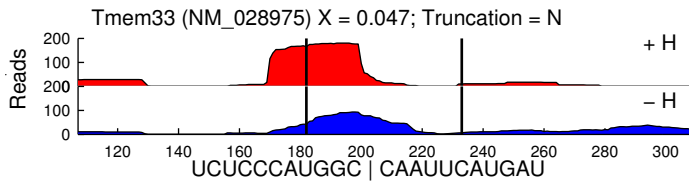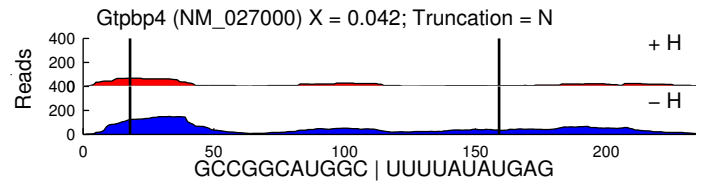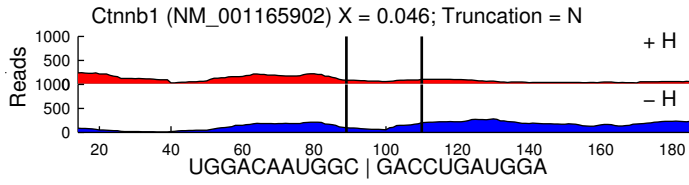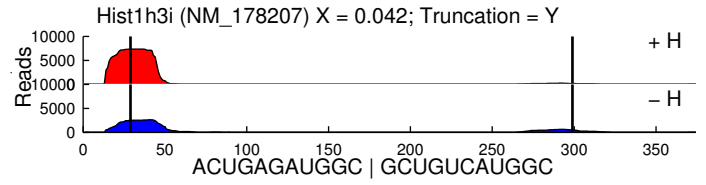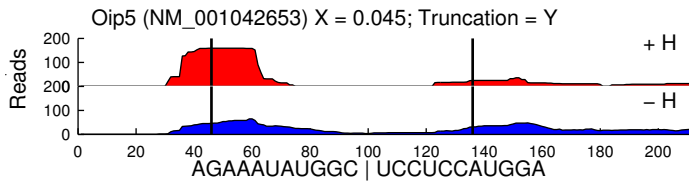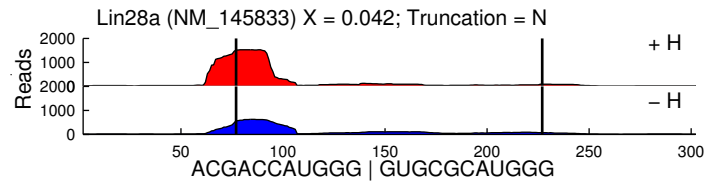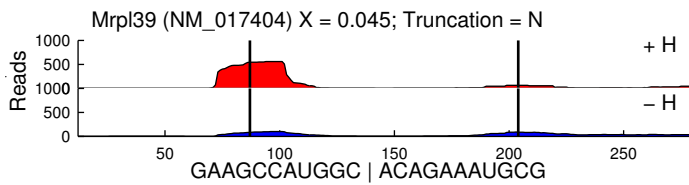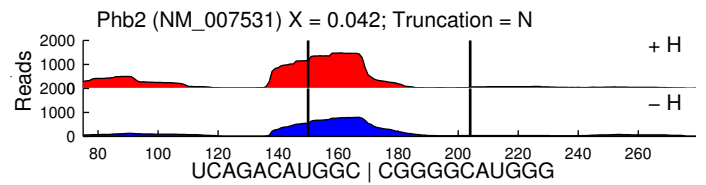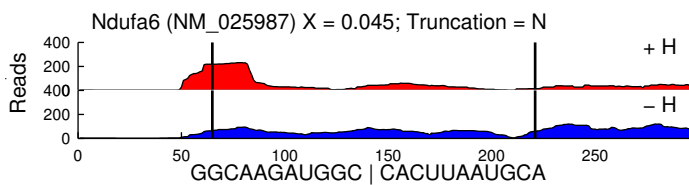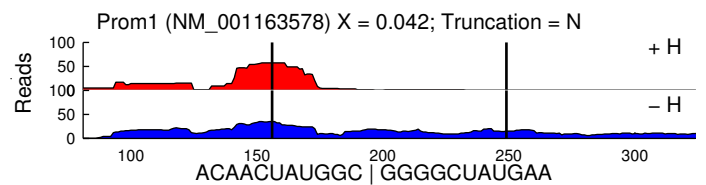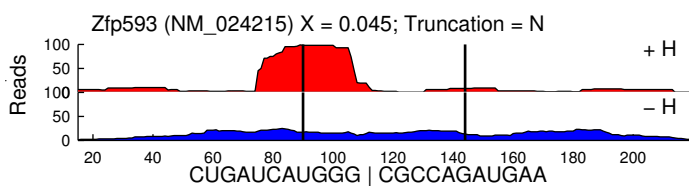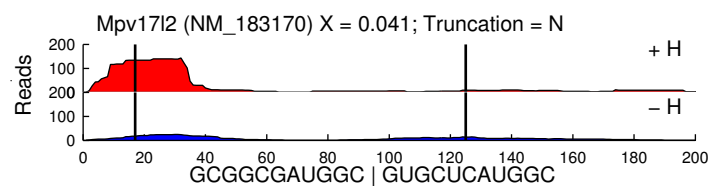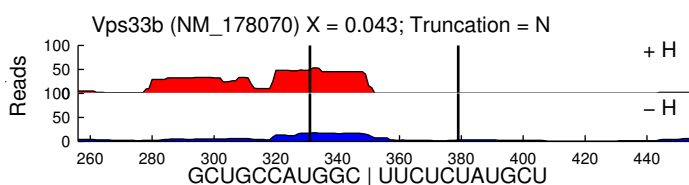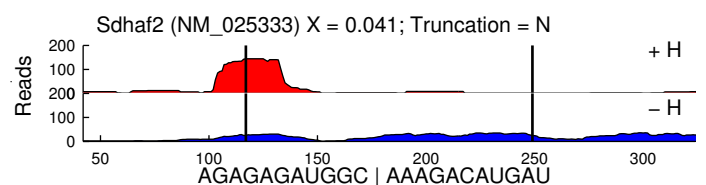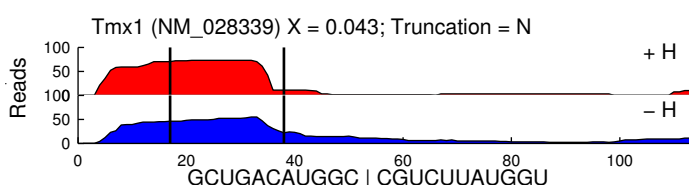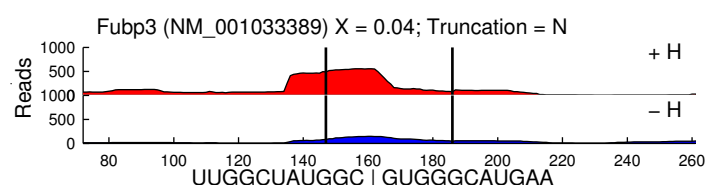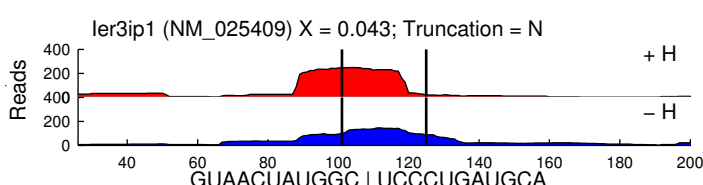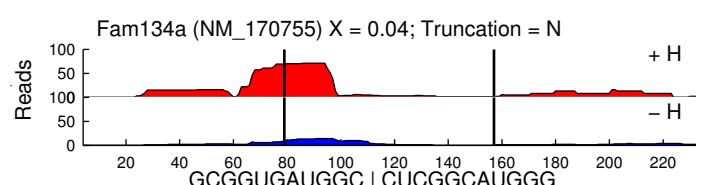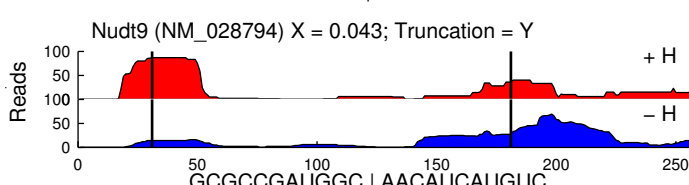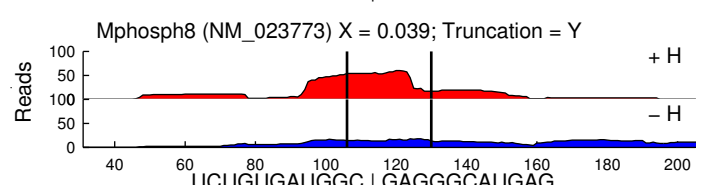

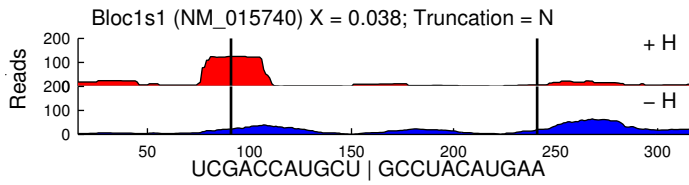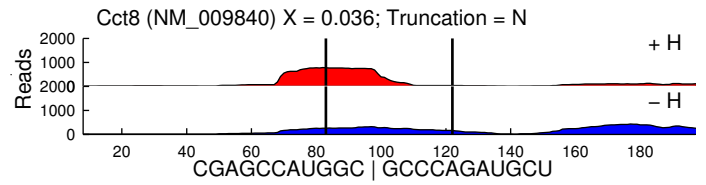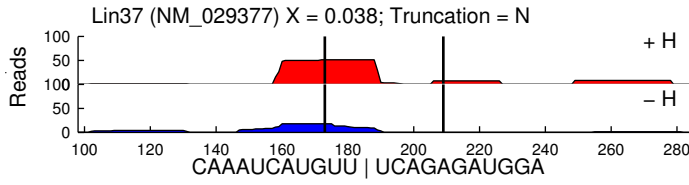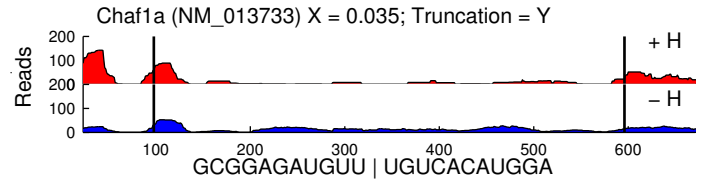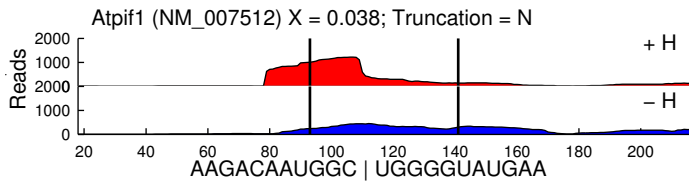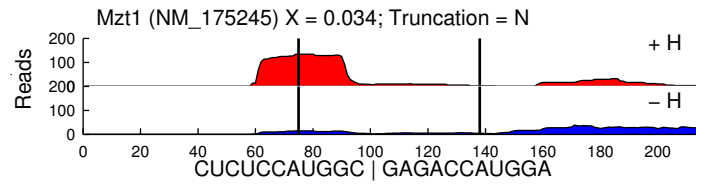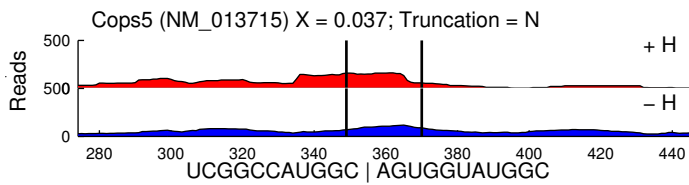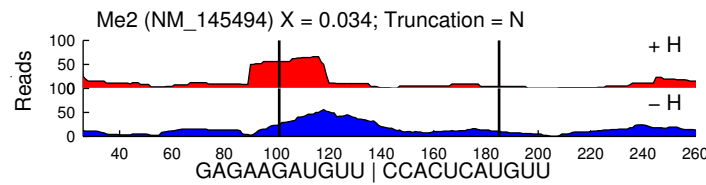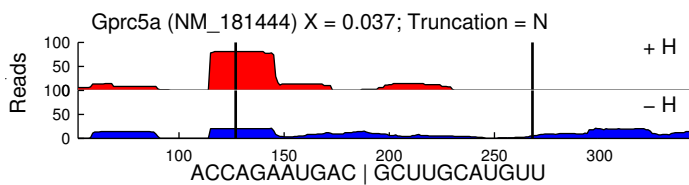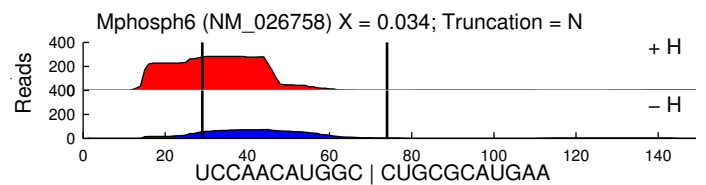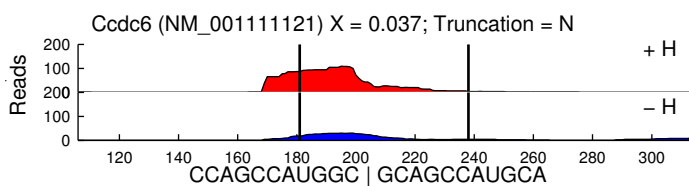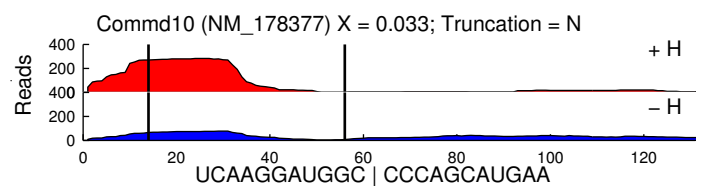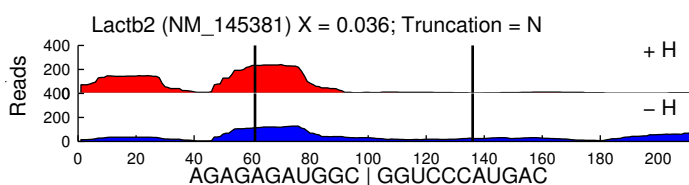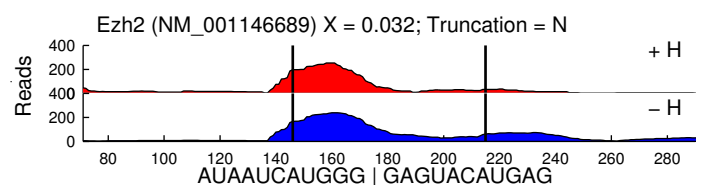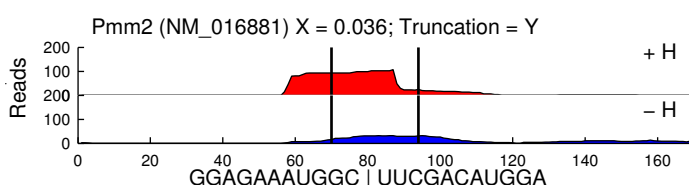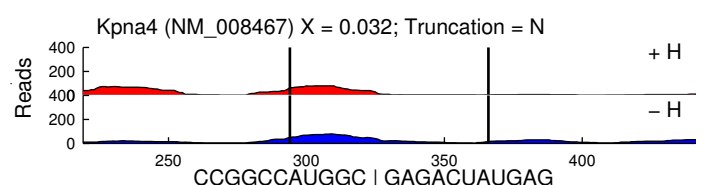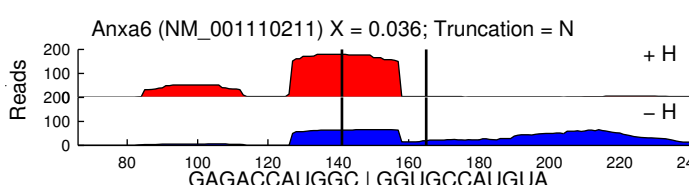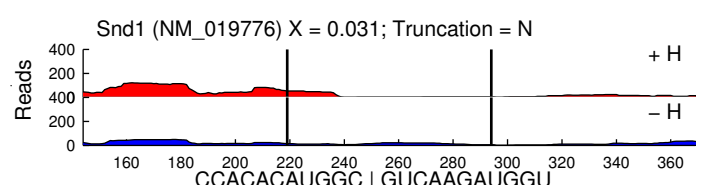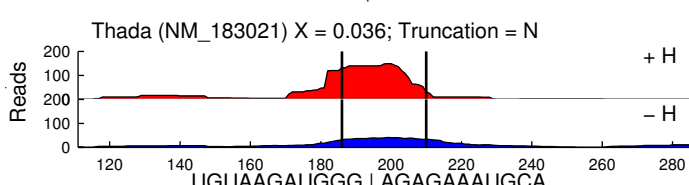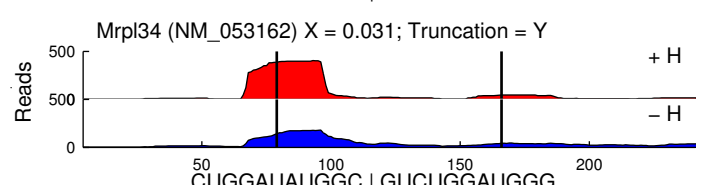

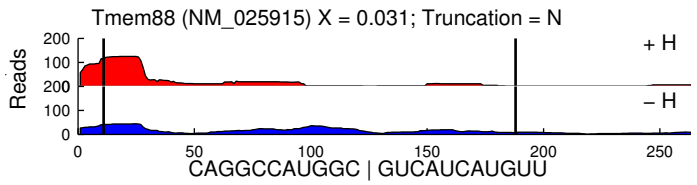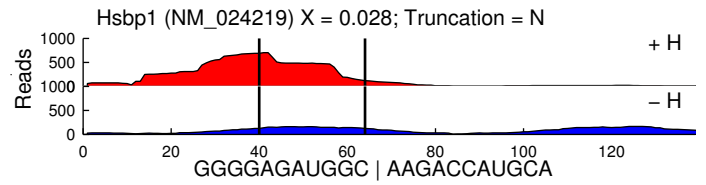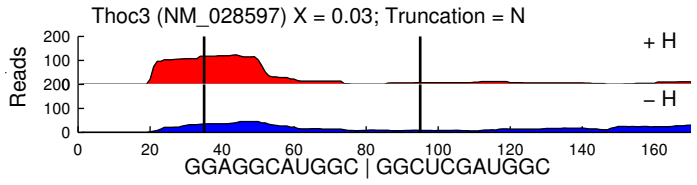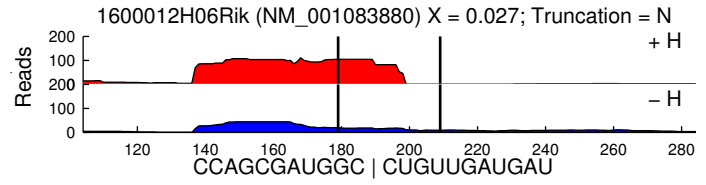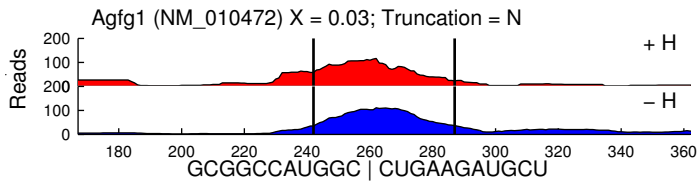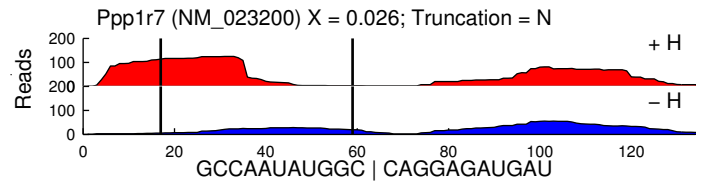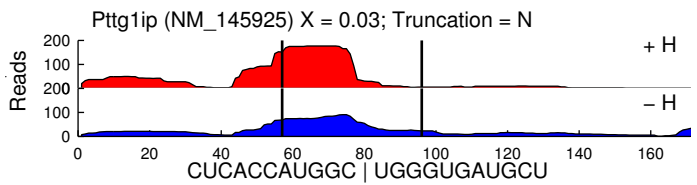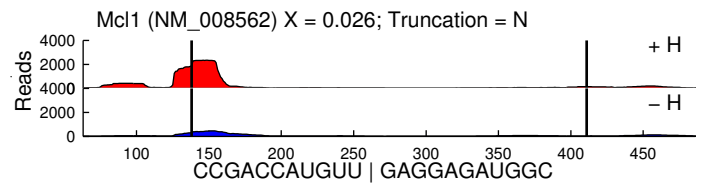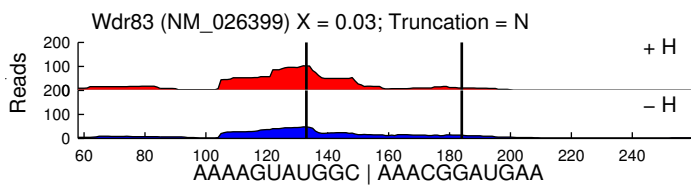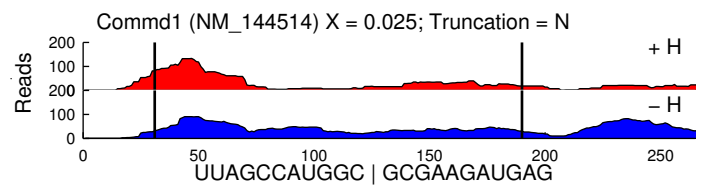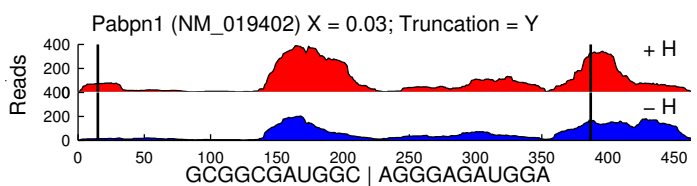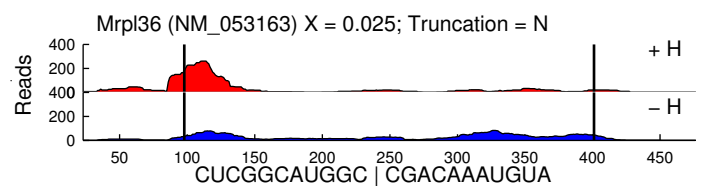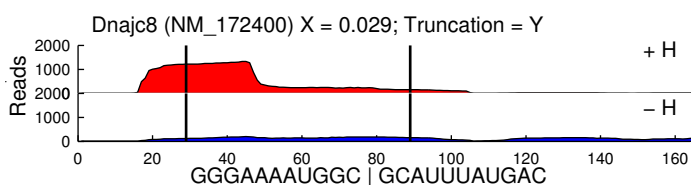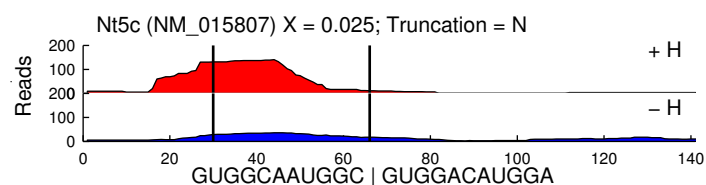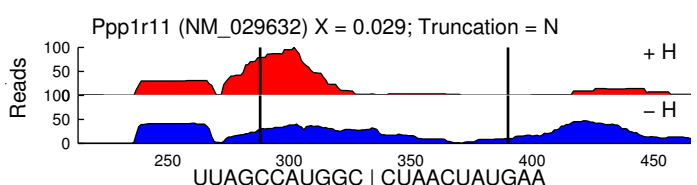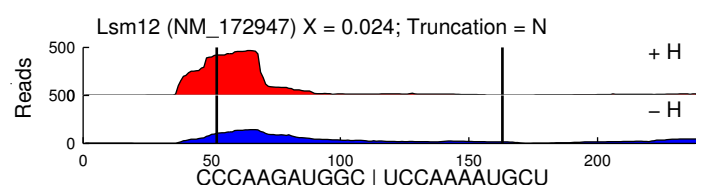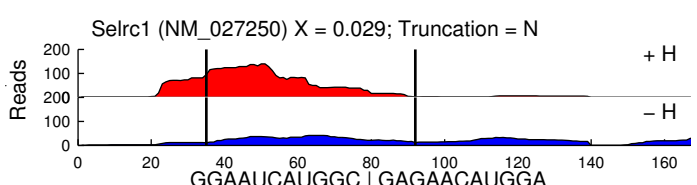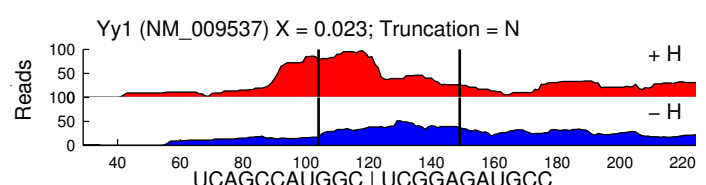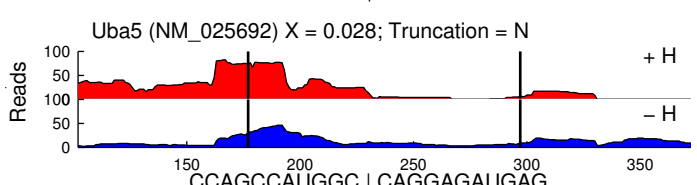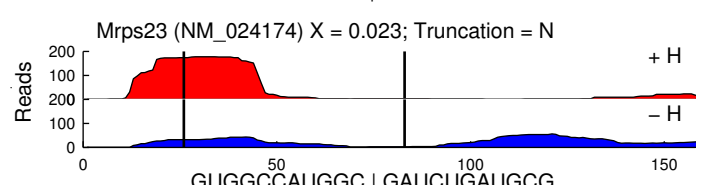



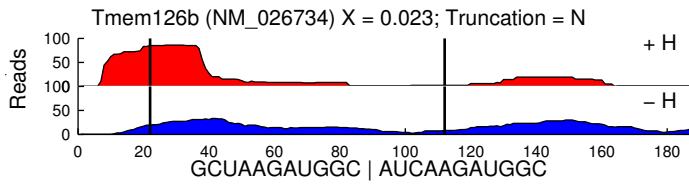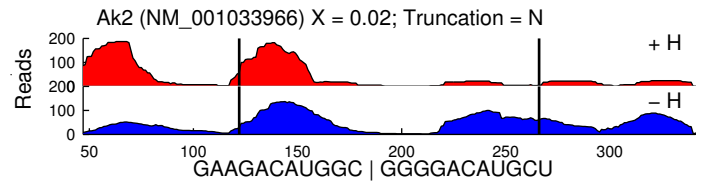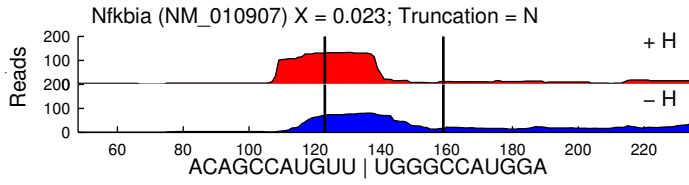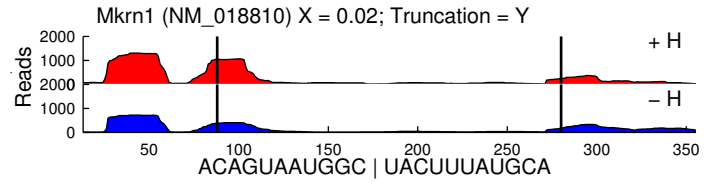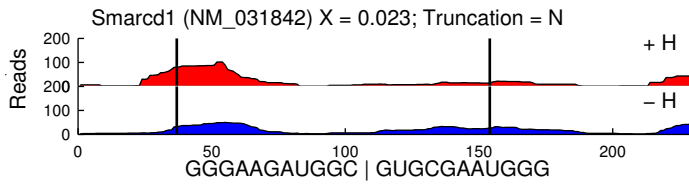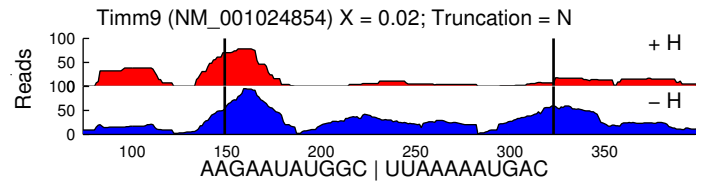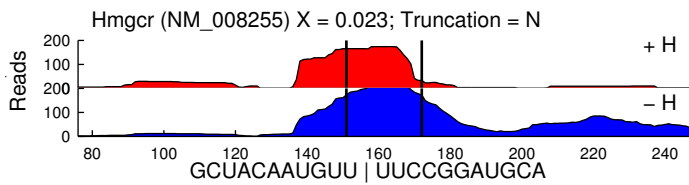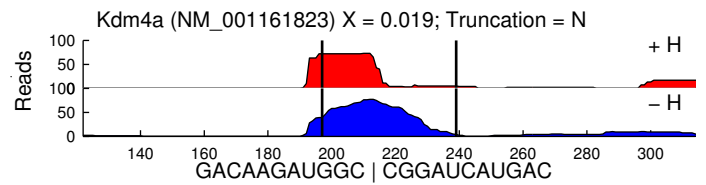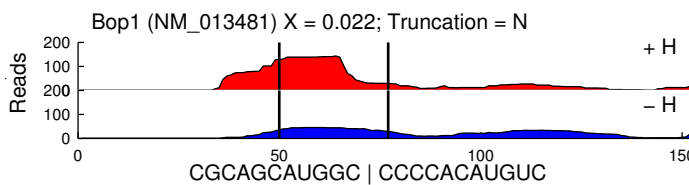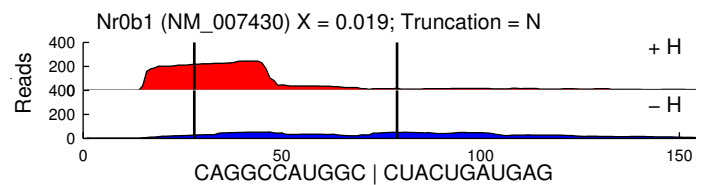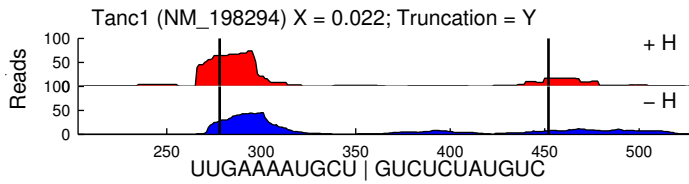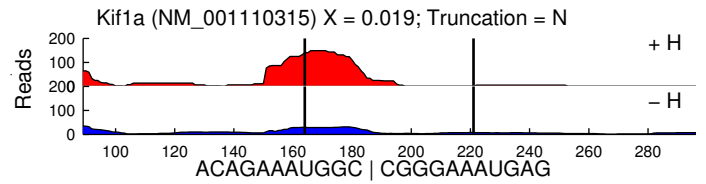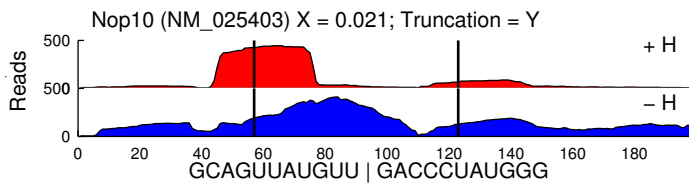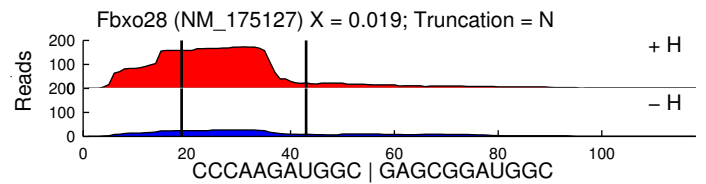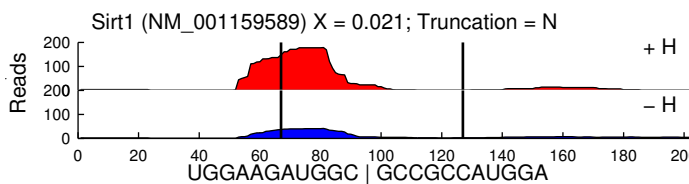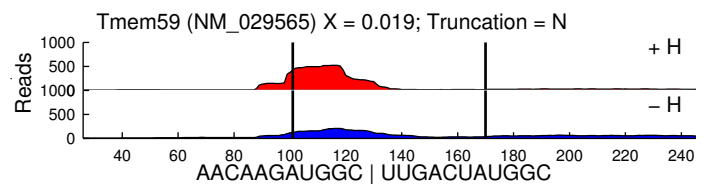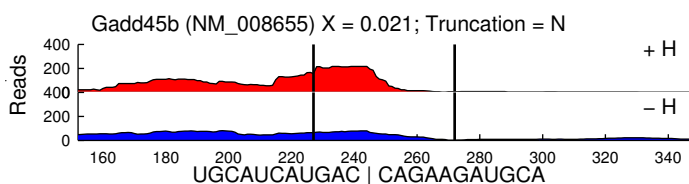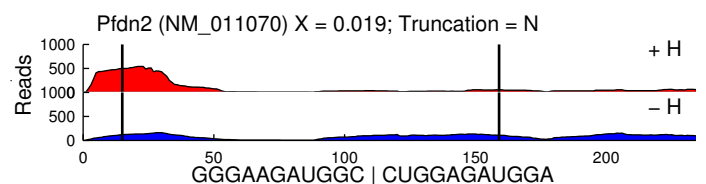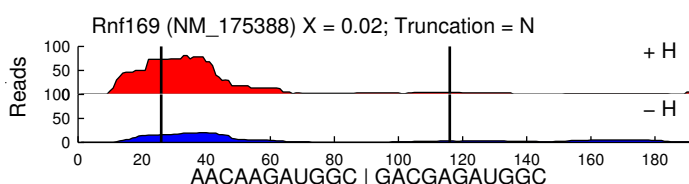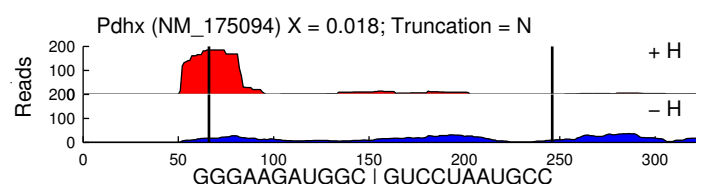

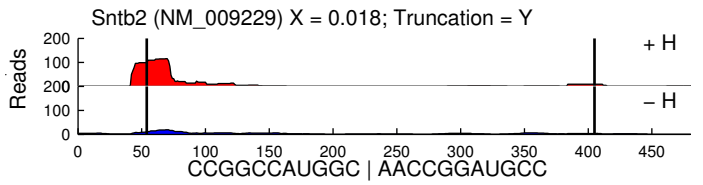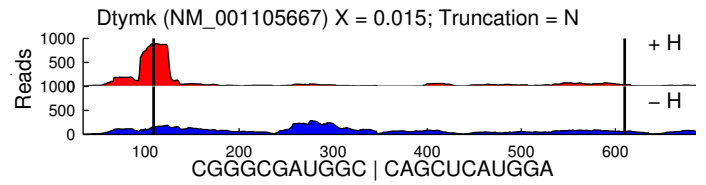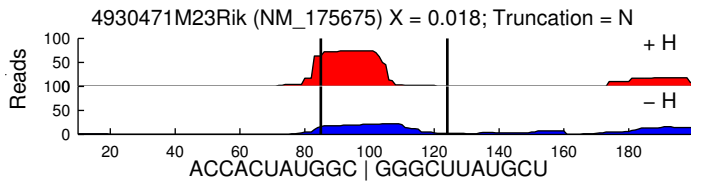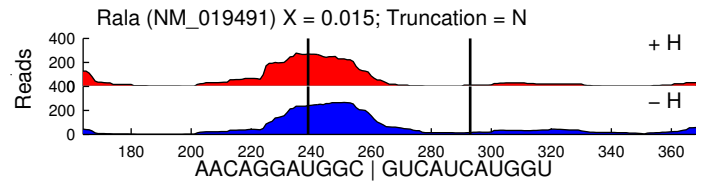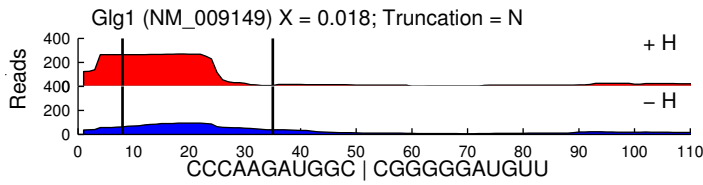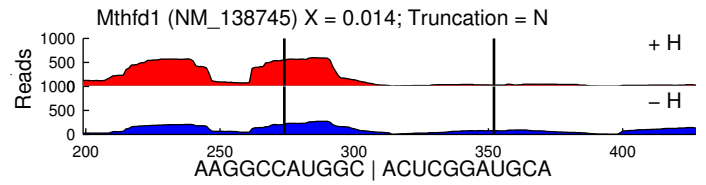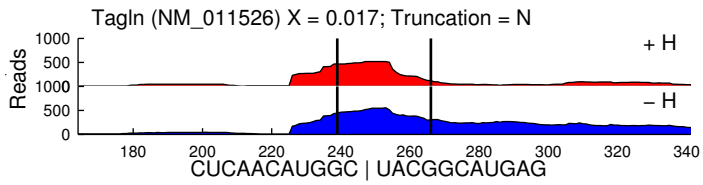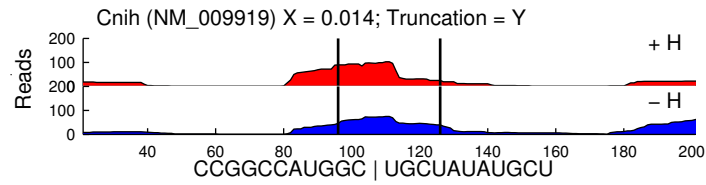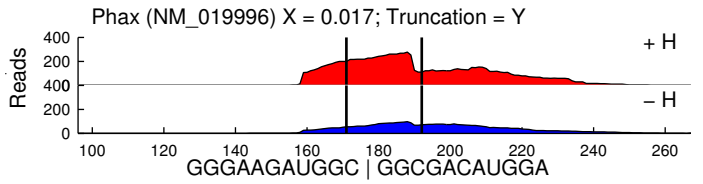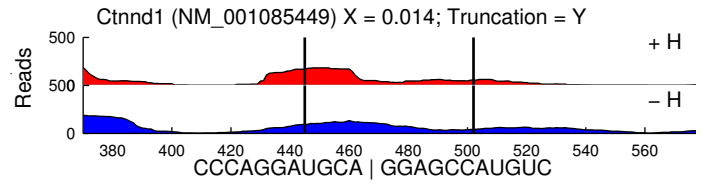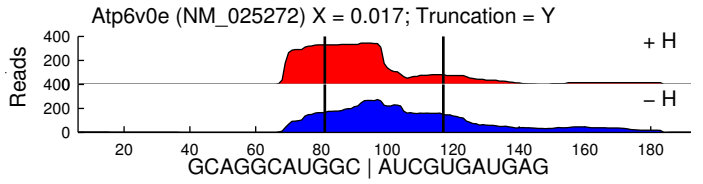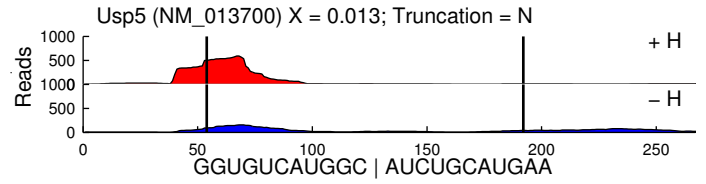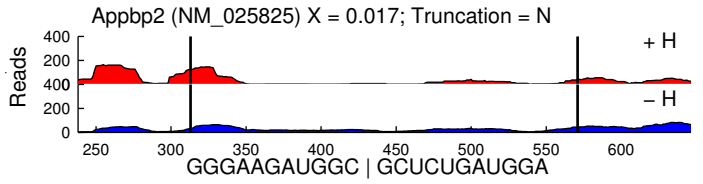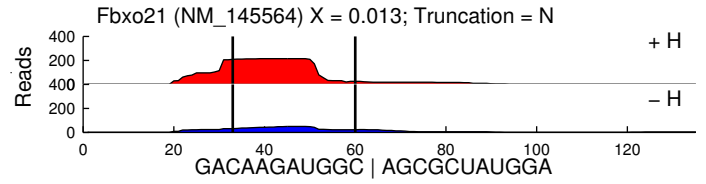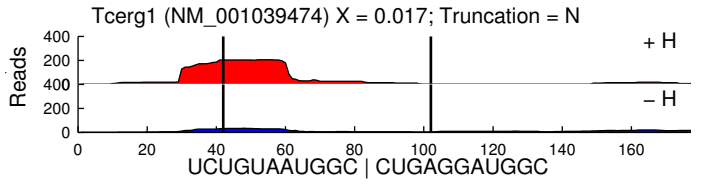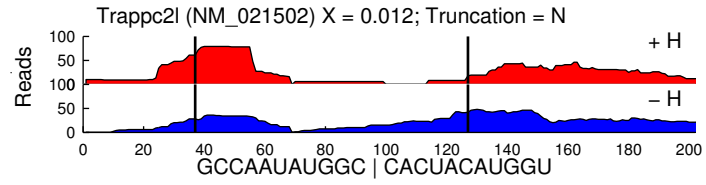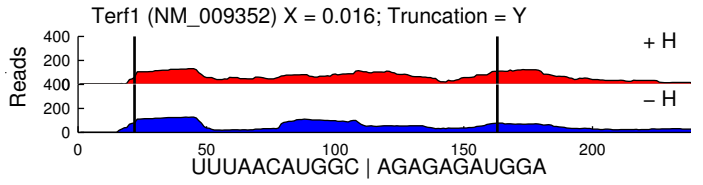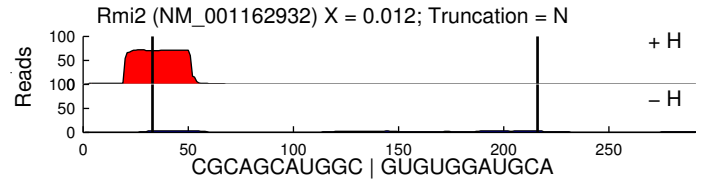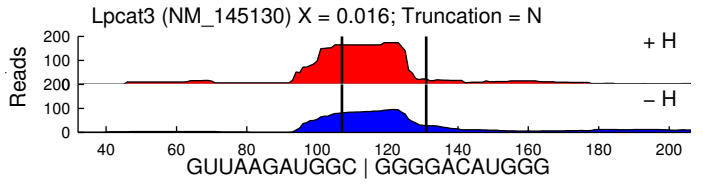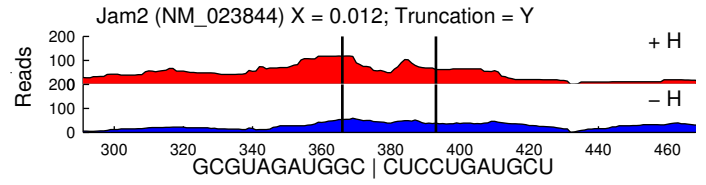

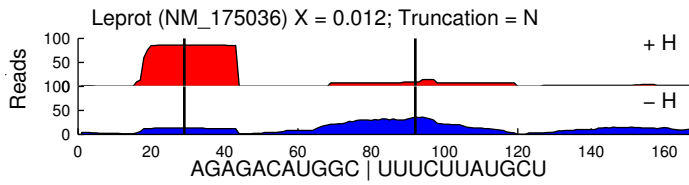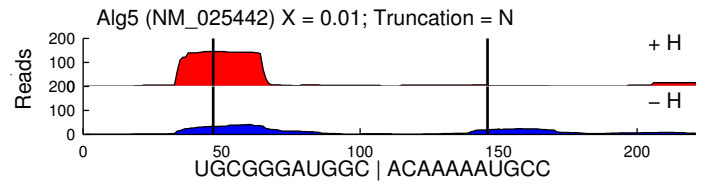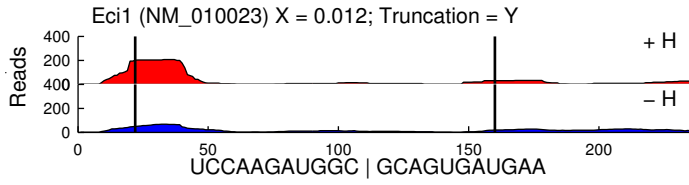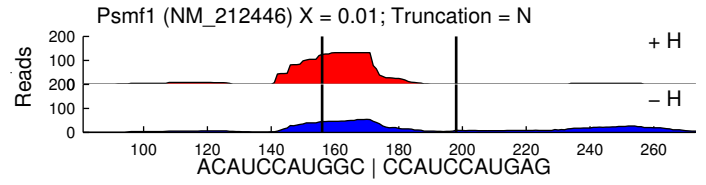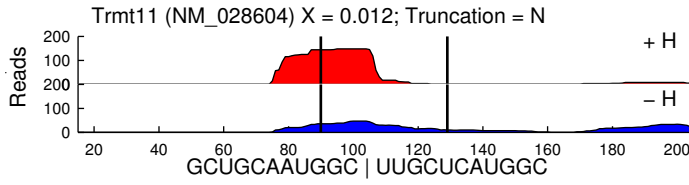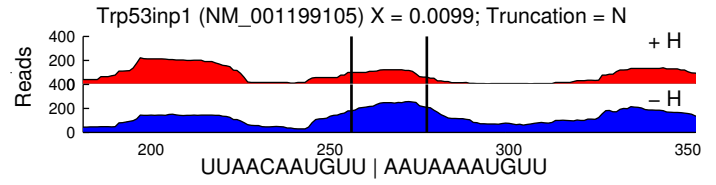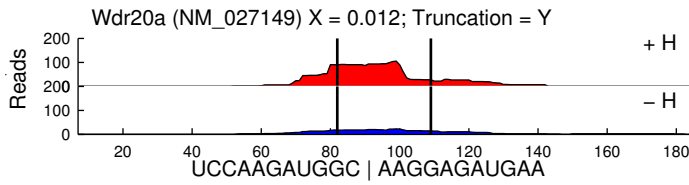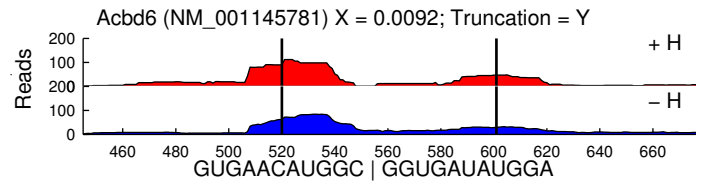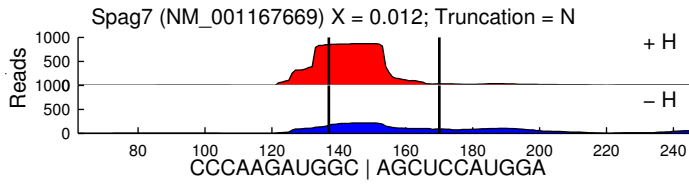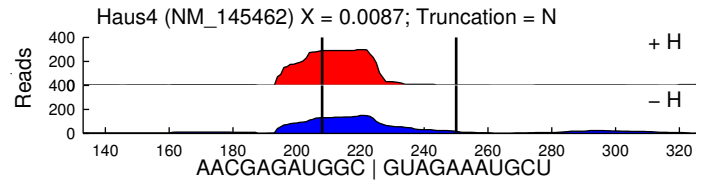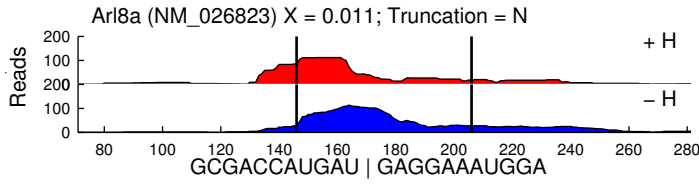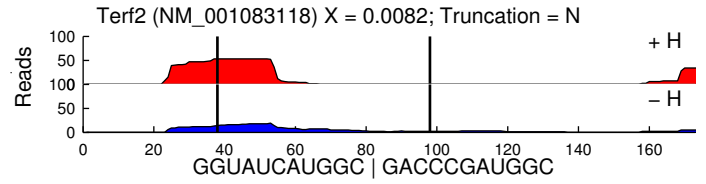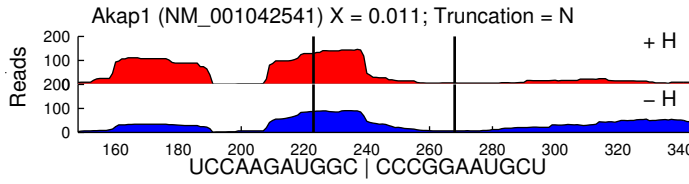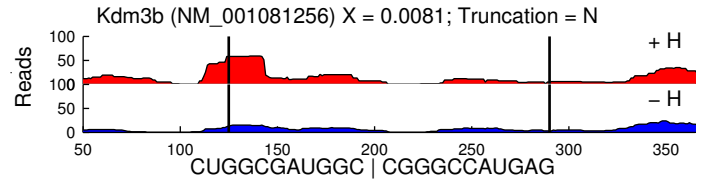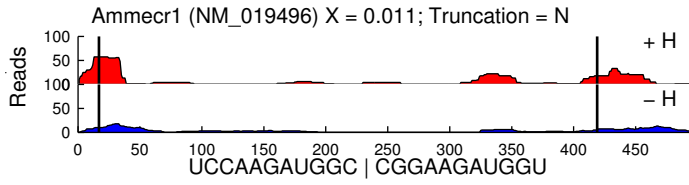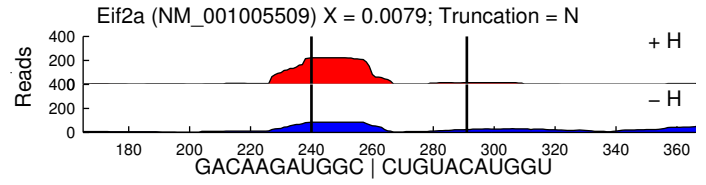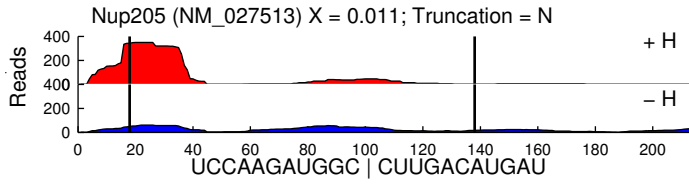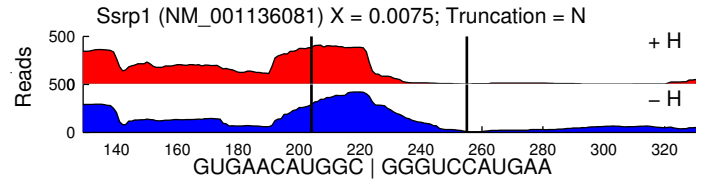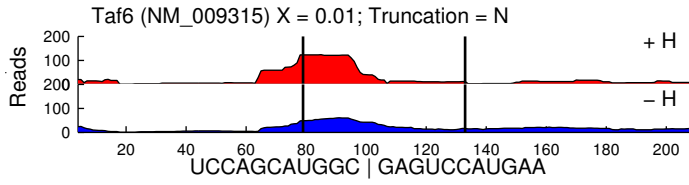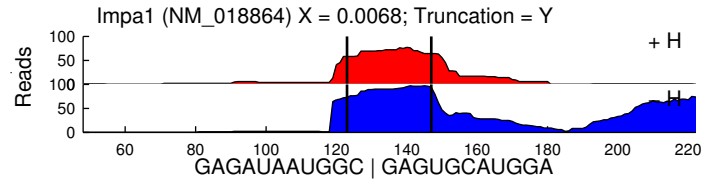

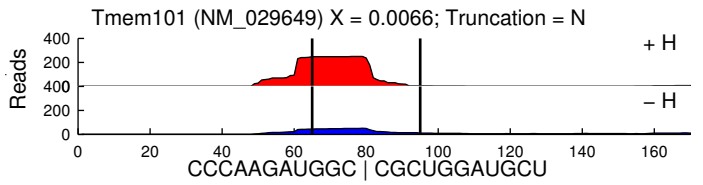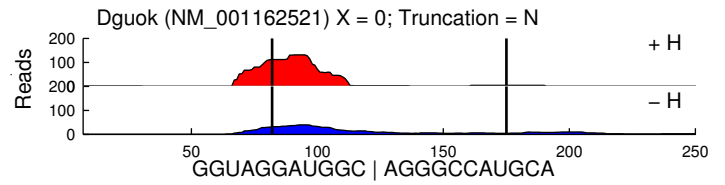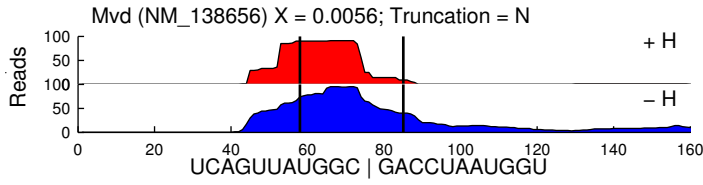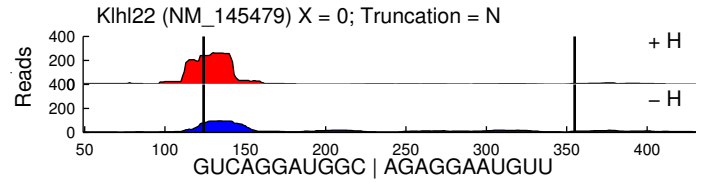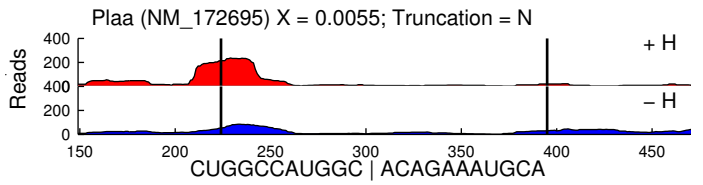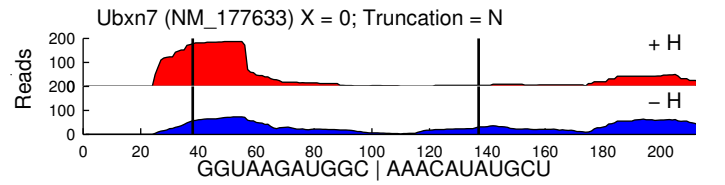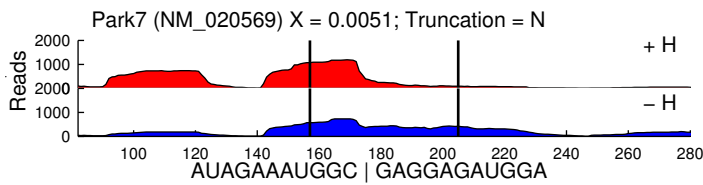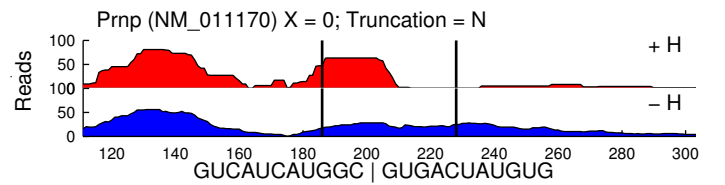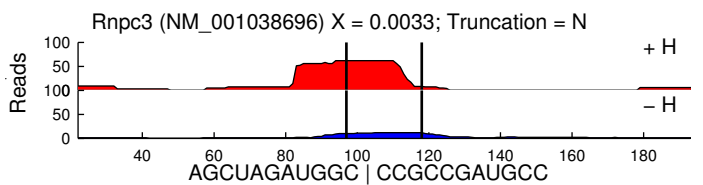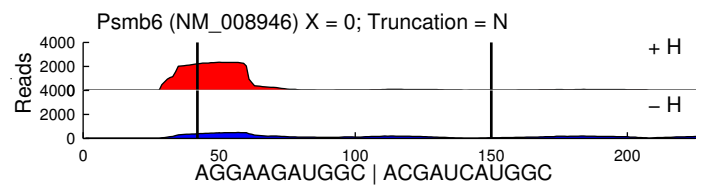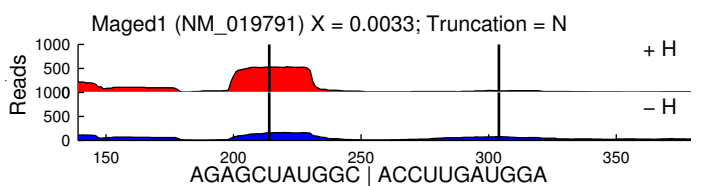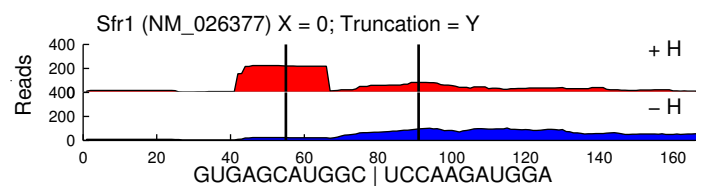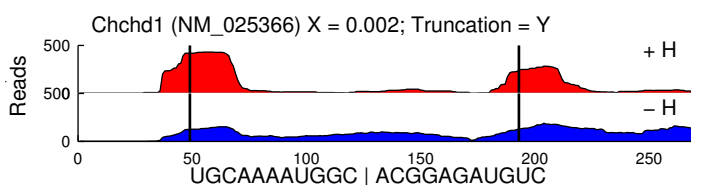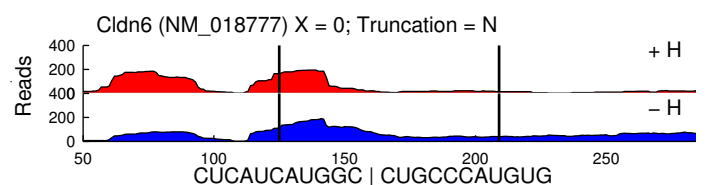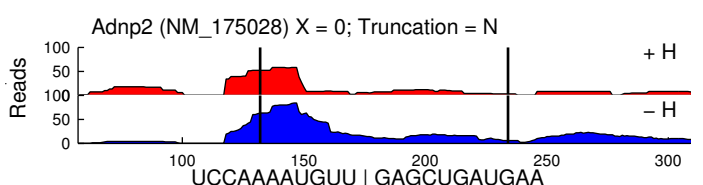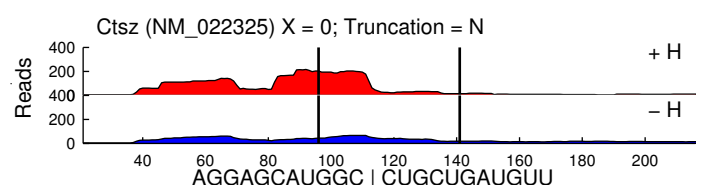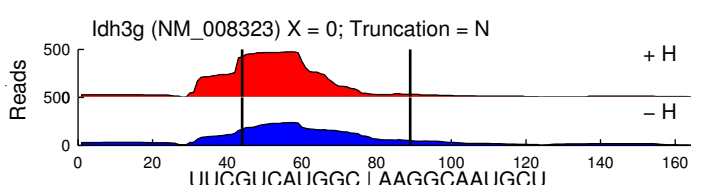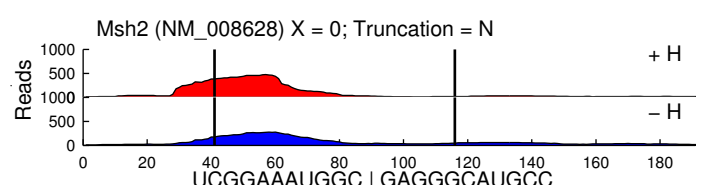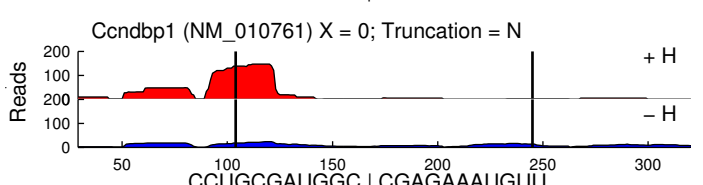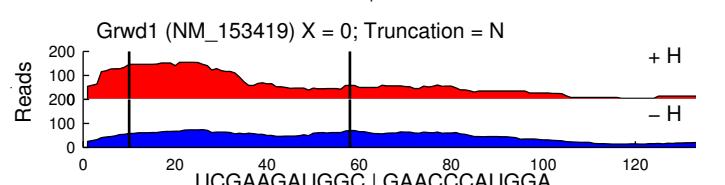

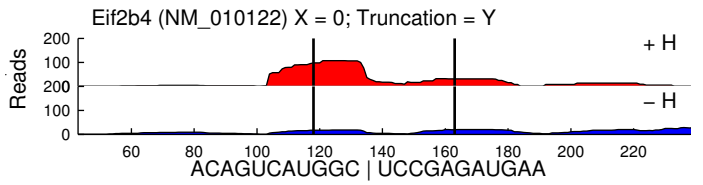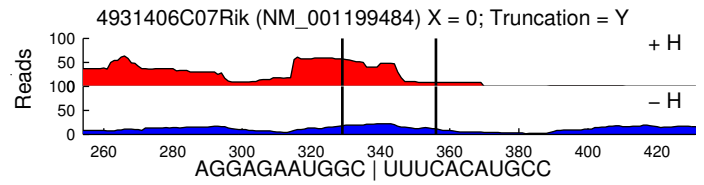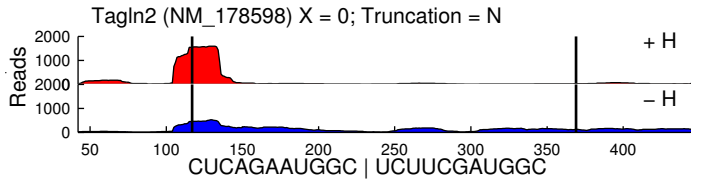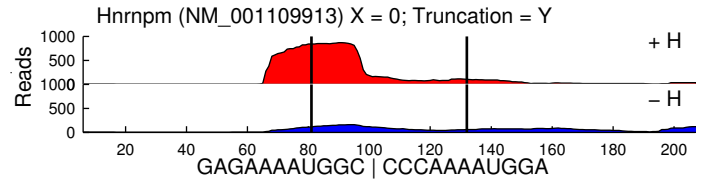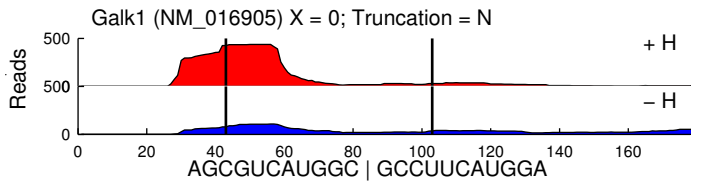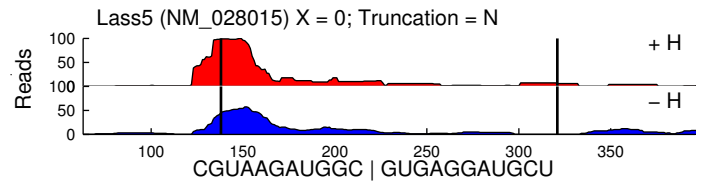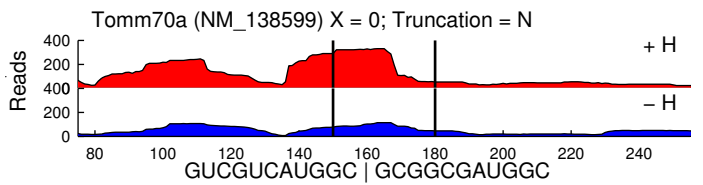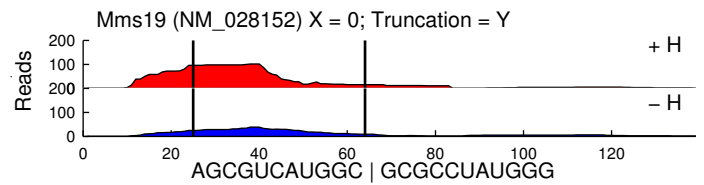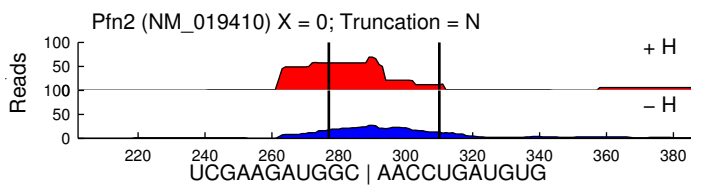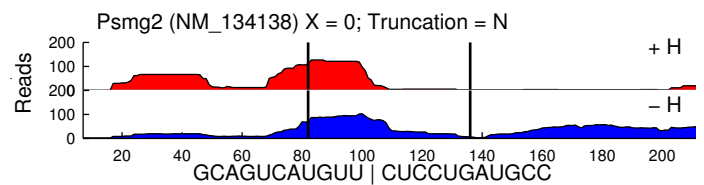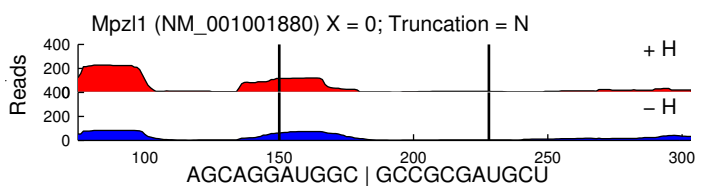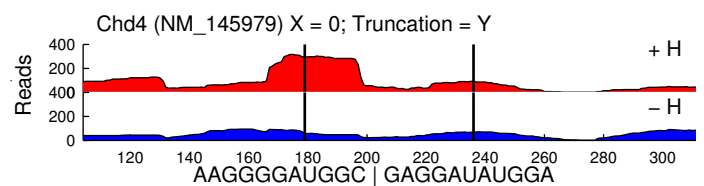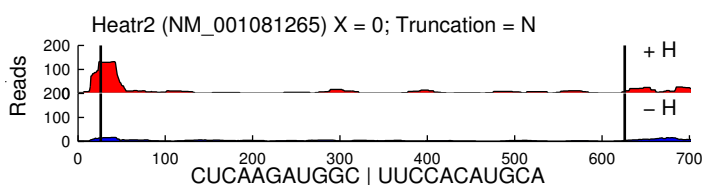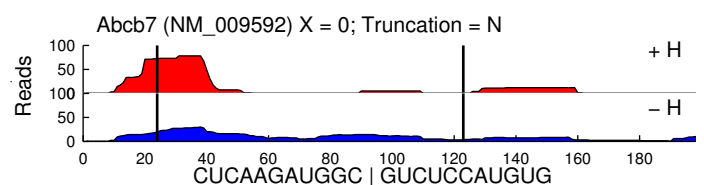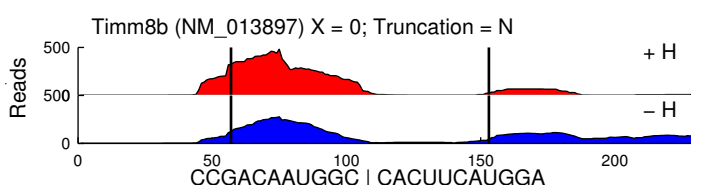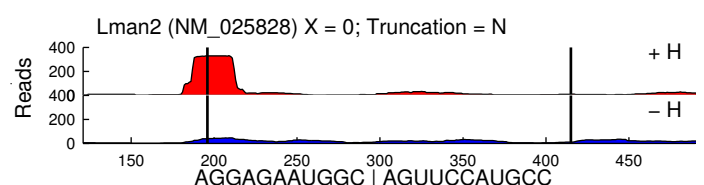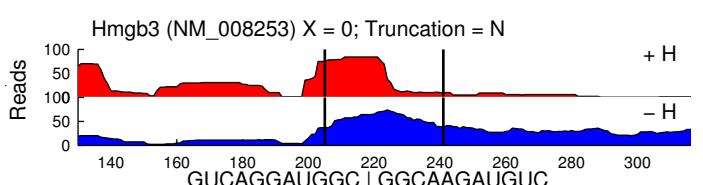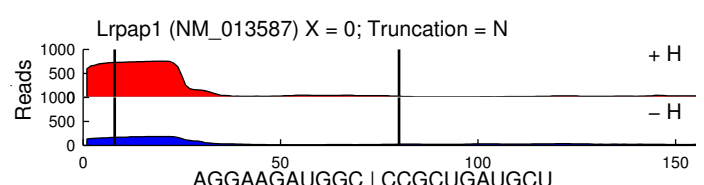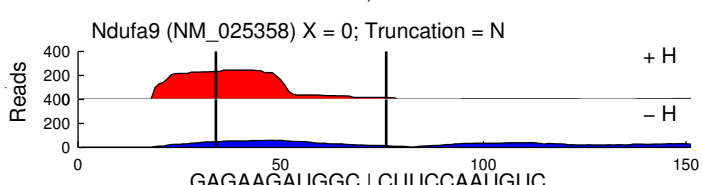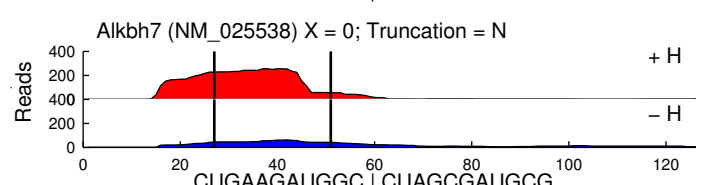

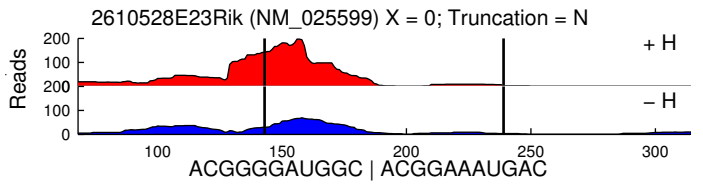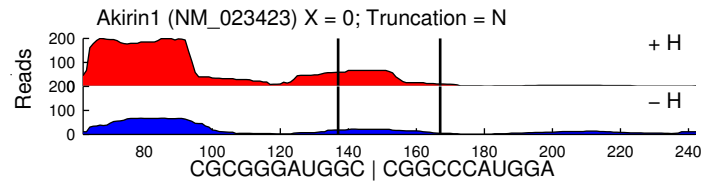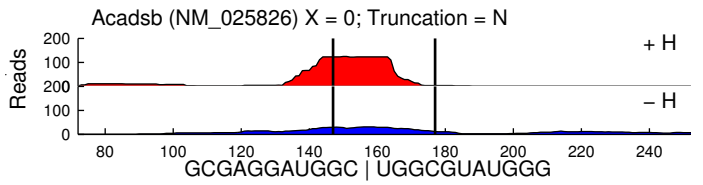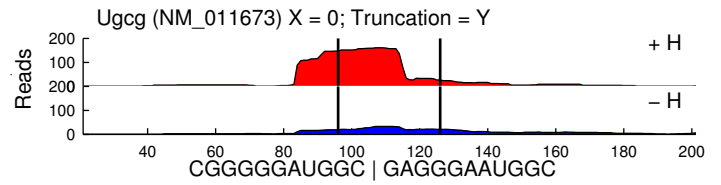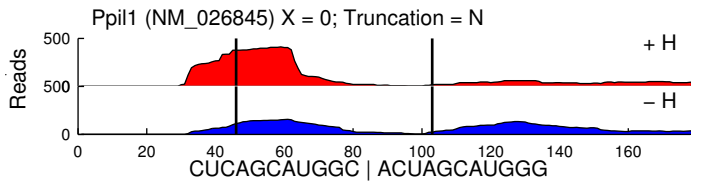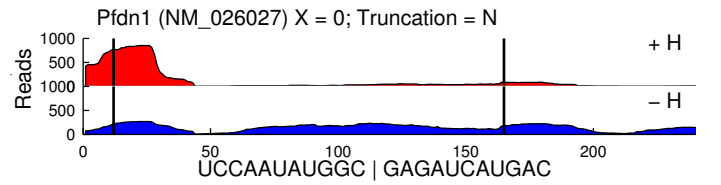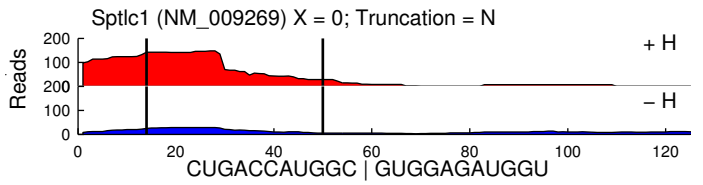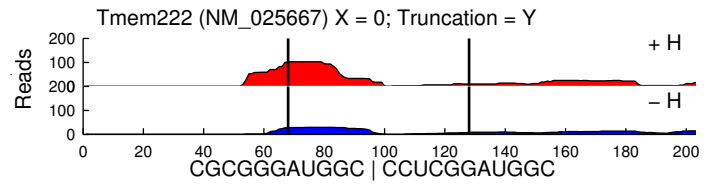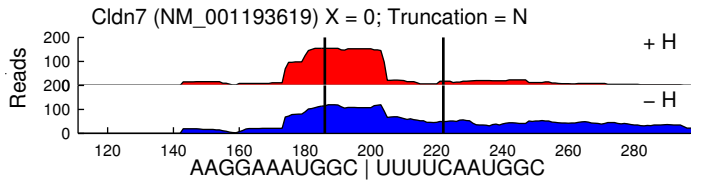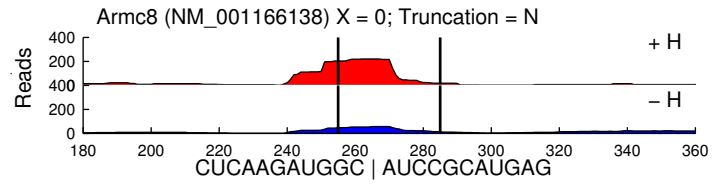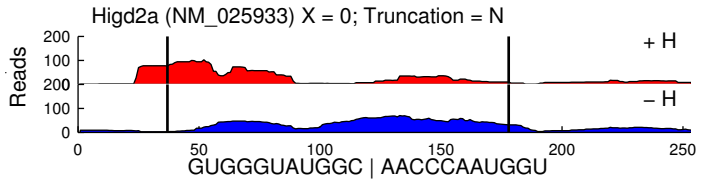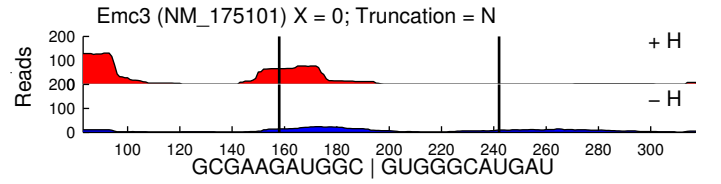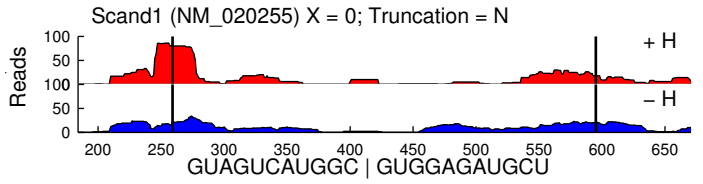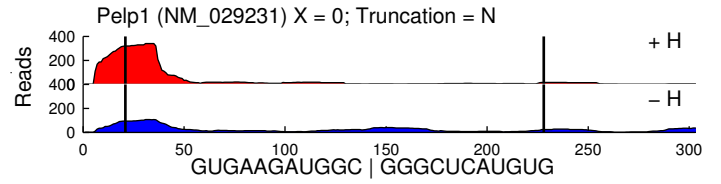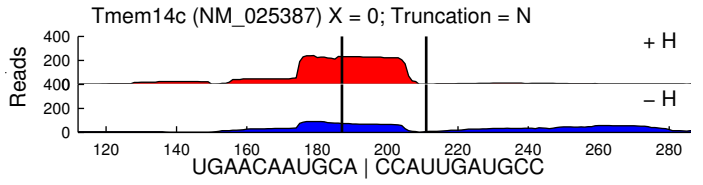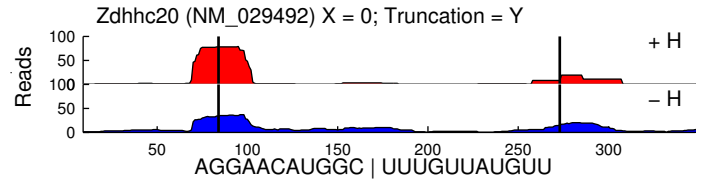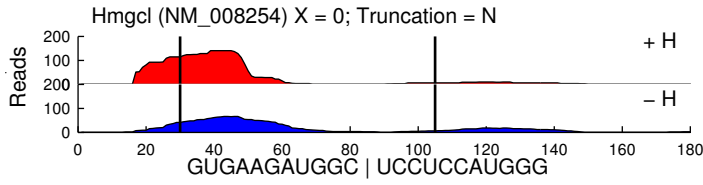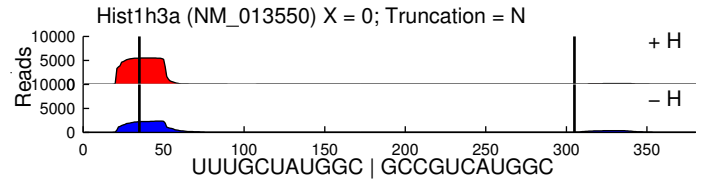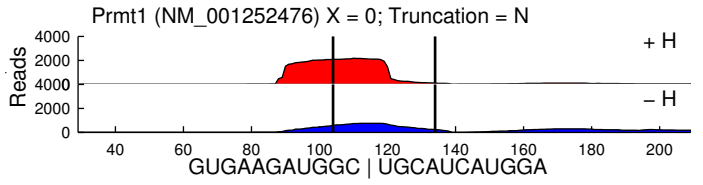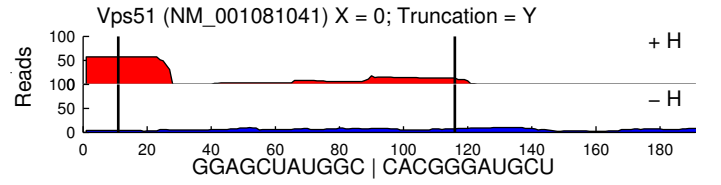

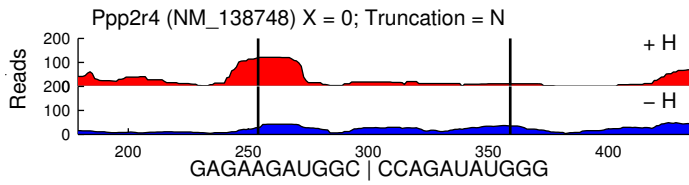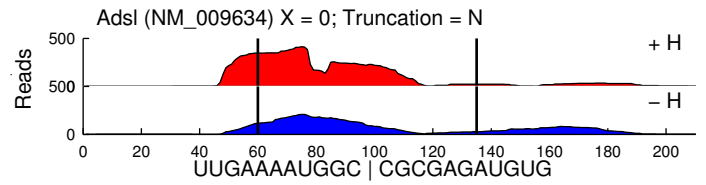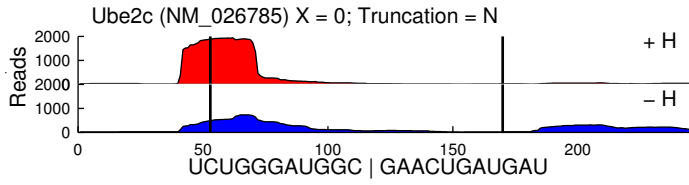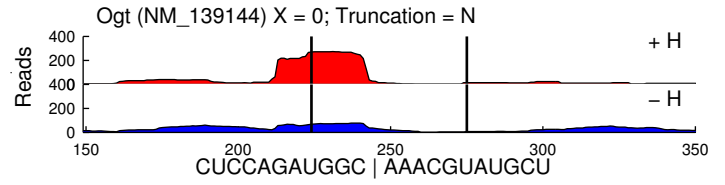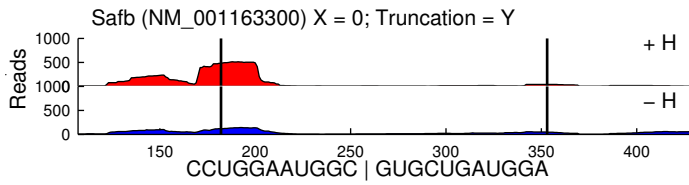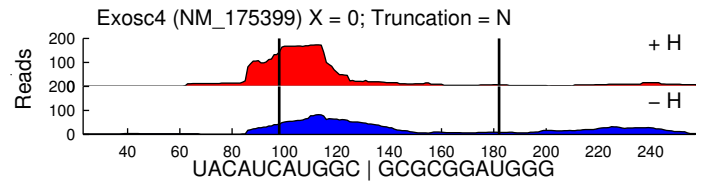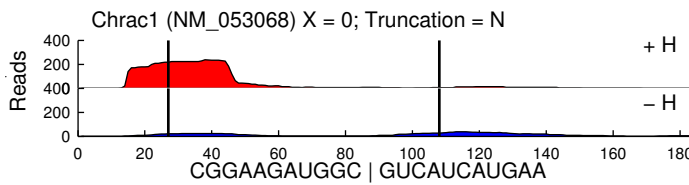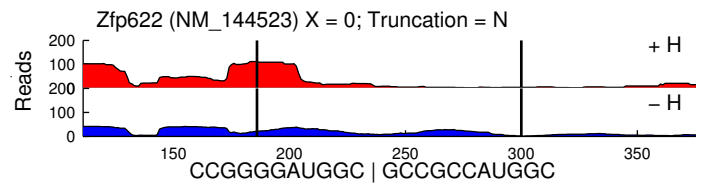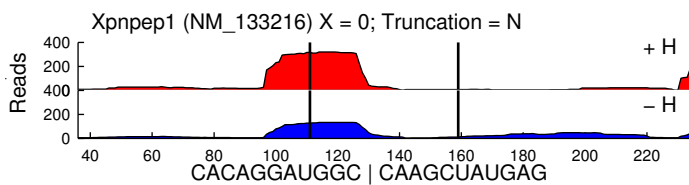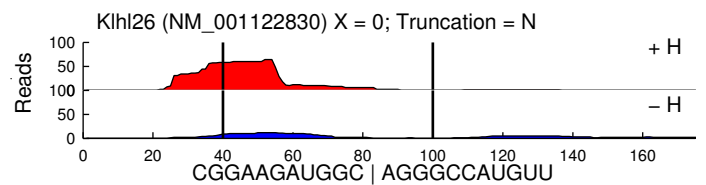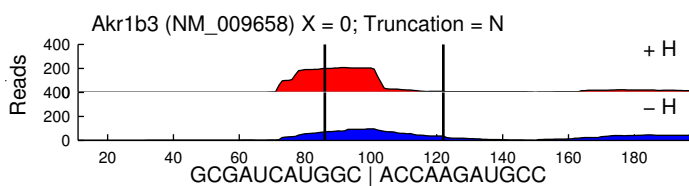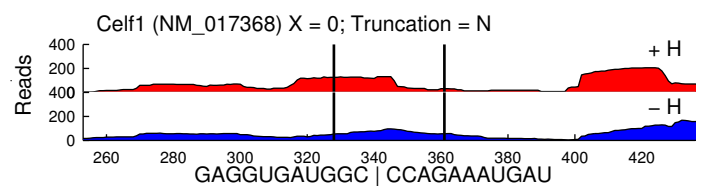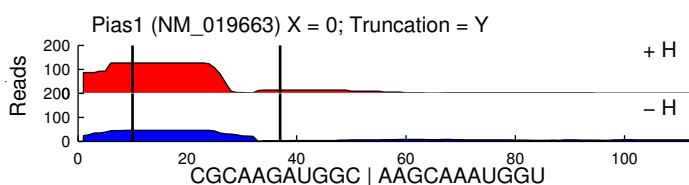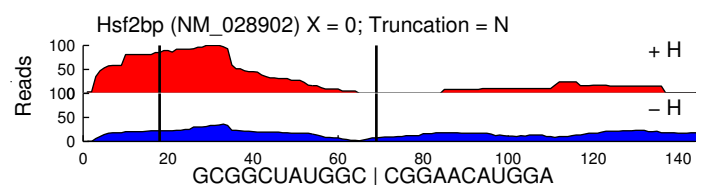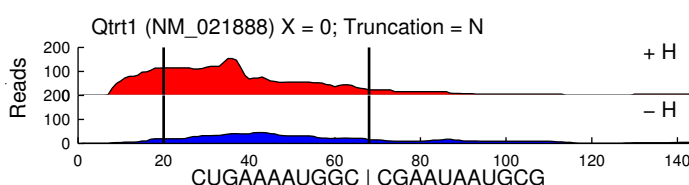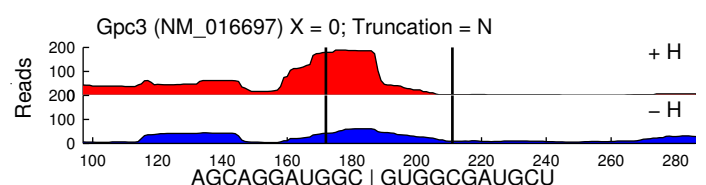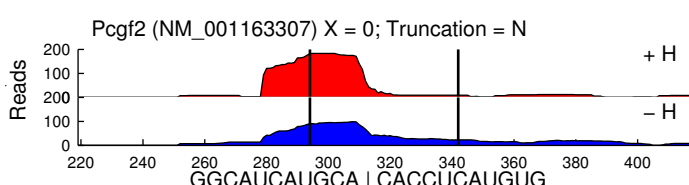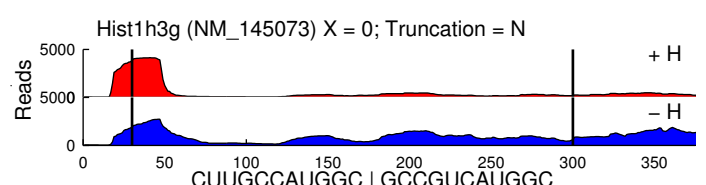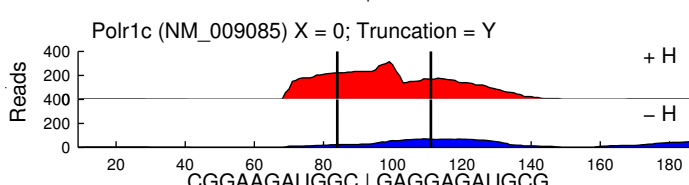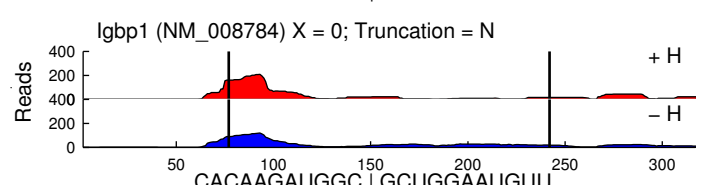

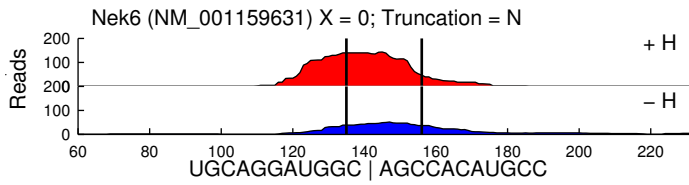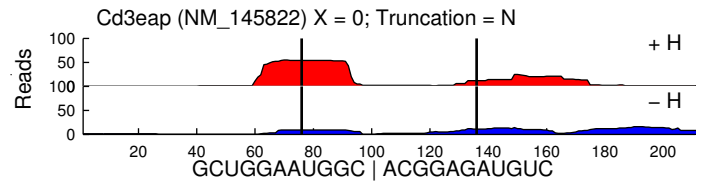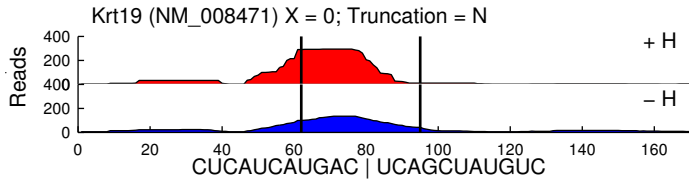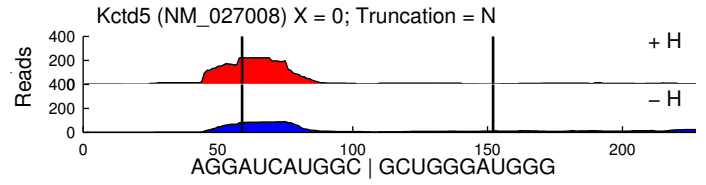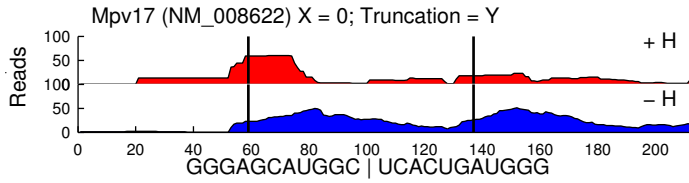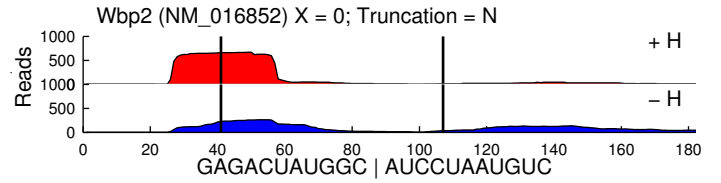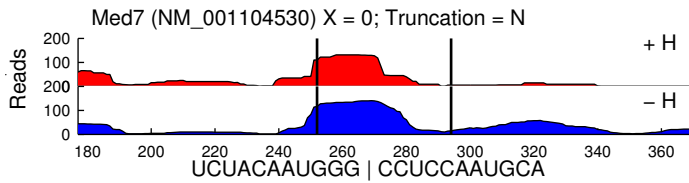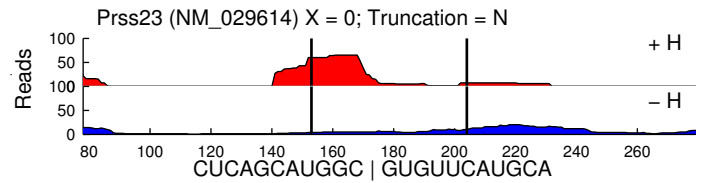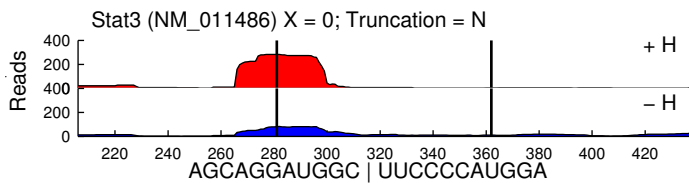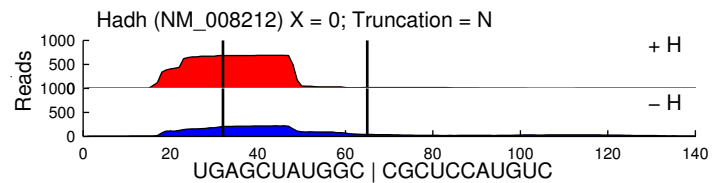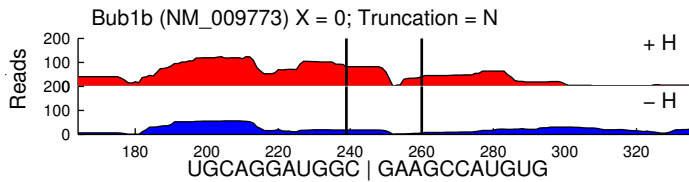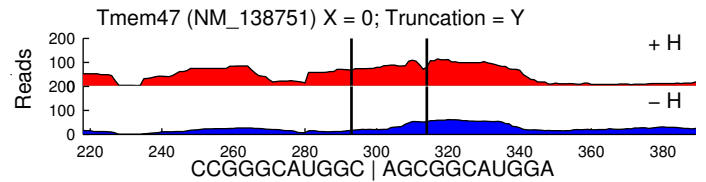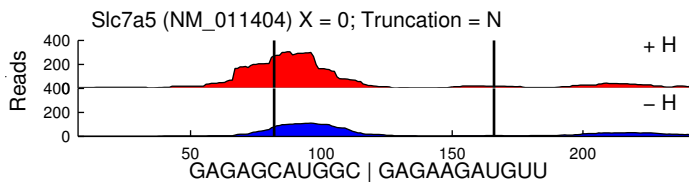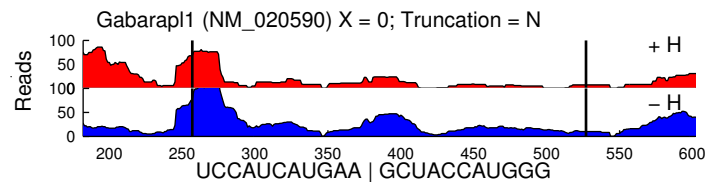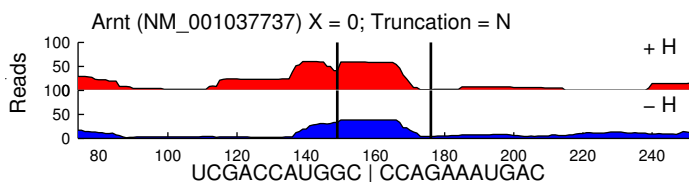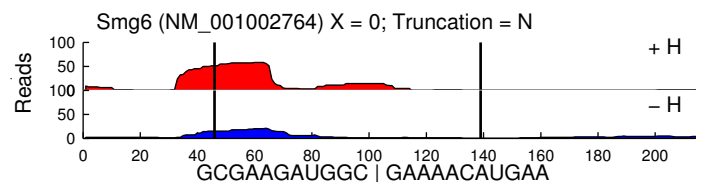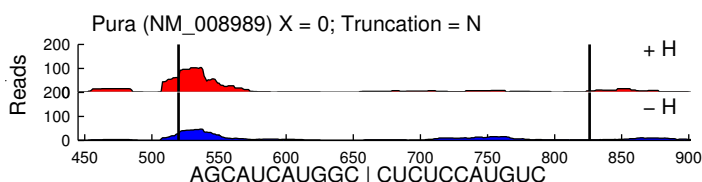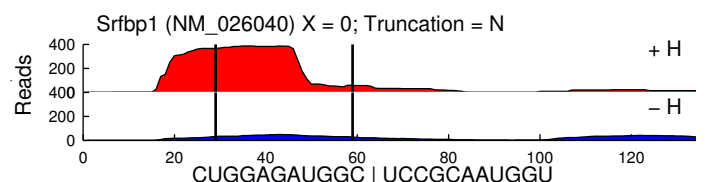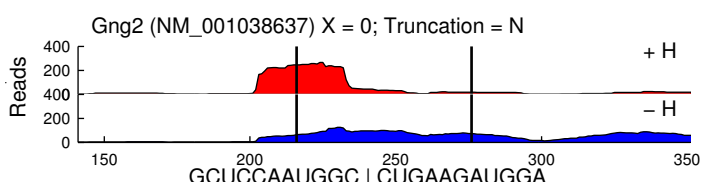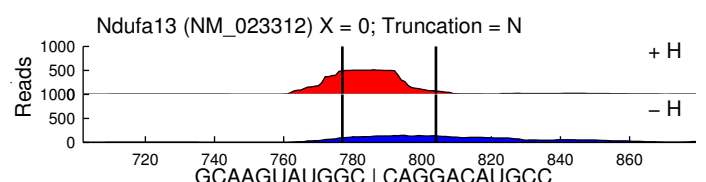



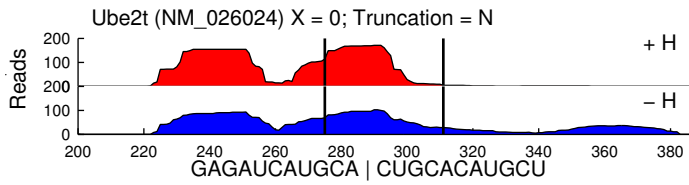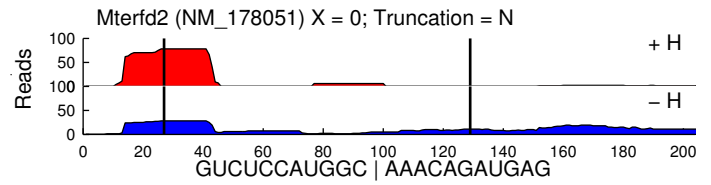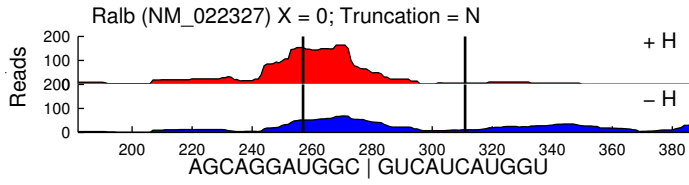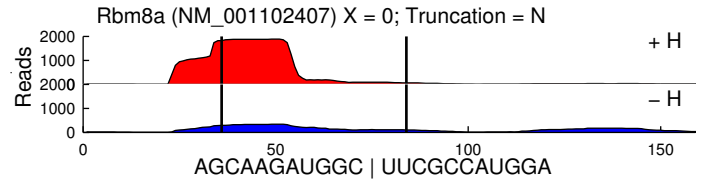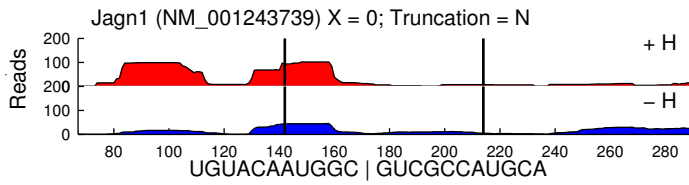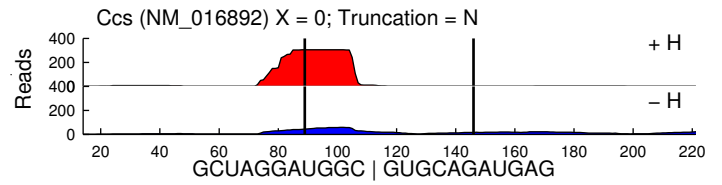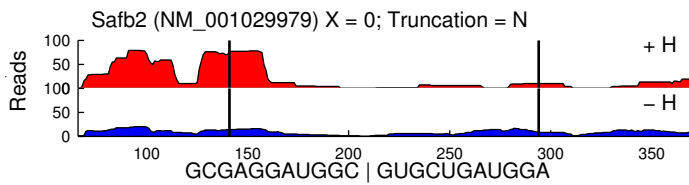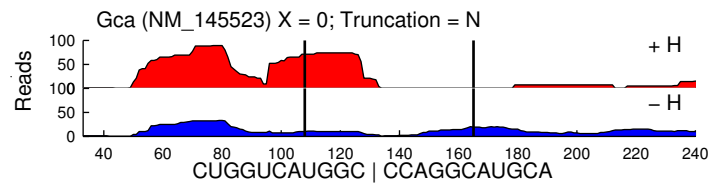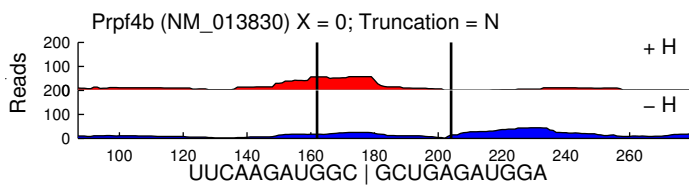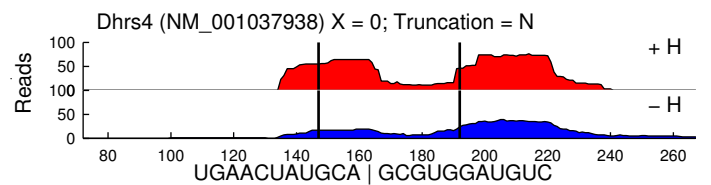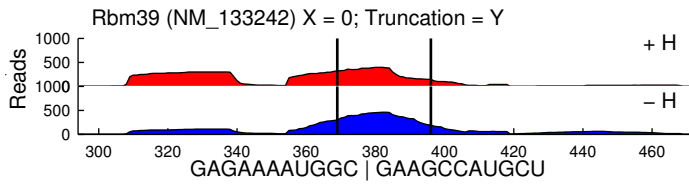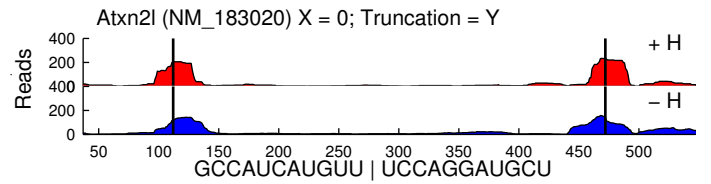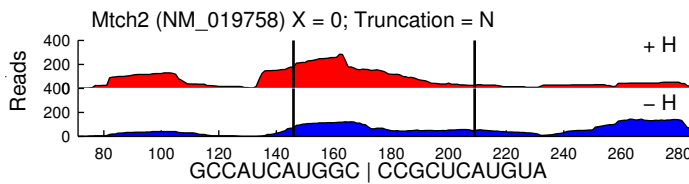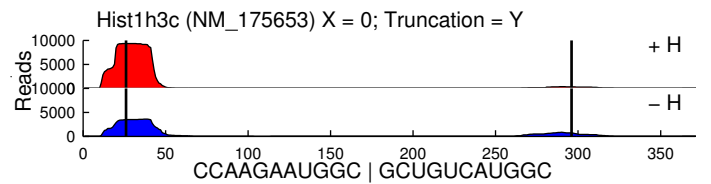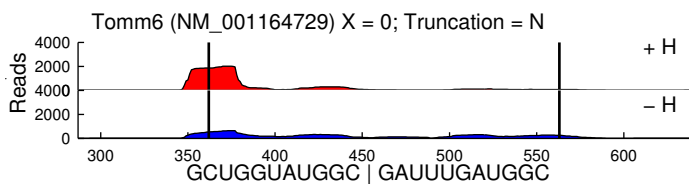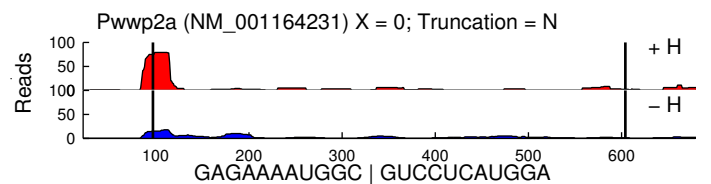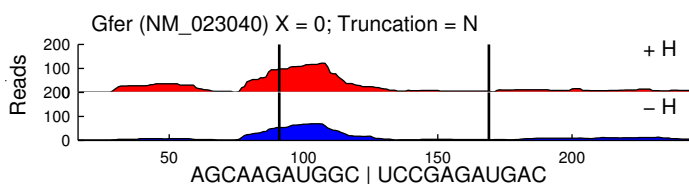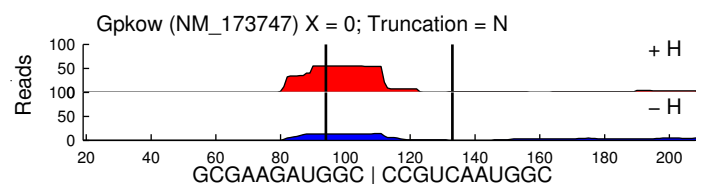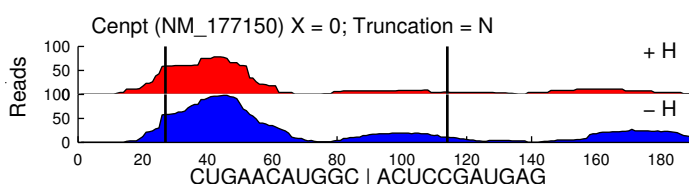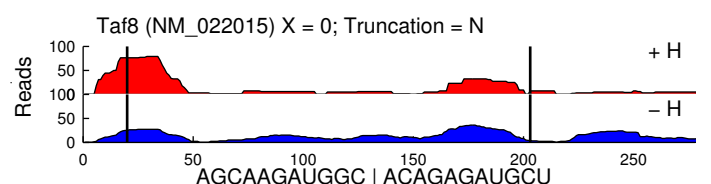

Supplement: msb0010-0748-SD2.pdf [file msb0010-0748-SD2.pdf]
